# Supplementary material
Source: PubMed Central journal article supplement (PMC7284301)
Supplement: jama-323-2290-s001.pdf [file jama-323-2290-s001.pdf]

## Supplementary Online Content

Levis B, Sun Y, He C, et al; Depression Screening Data (DEPRESSD) PHQ Collaboration. Accuracy of the PHQ-2 alone and in combination with the PHQ-9 for screening to detect major depression: systematic review and meta-analysis. *JAMA*. doi:10.1001/jama.2020.6504

**eMethods 1.** Search Strategies

**eMethods 2.** Quality Assessment of Diagnostic Accuracy Studies-2 (QUADAS-2) Coding Manual for Primary Studies Included in the Present Study

**eFigure 1.** Receiver operating characteristic (ROC) Plots Comparing Sensitivity and Specificity Estimates for Patient Health Questionnaire-2 (PHQ-2) Cutoffs 1-6 Among Semi-structured Diagnostic Interviews, Fully Structured Diagnostic Interviews, and the Mini International Neuropsychiatric Interview (MINI)

**eFigure 2.** Forest Plots of Sensitivity and Specificity Estimates for Cutoff 2 and 3 of the PHQ-2 for Each Reference Standard Category, Including Among Participants Verified to Not Currently be Diagnosed or Receiving Treatment for a Mental Health Problem as Well as Among Participant Subgroups Based on Age, Sex, Human Development Index and Care Setting

**eFigure 3.** Nomograms of Positive and Negative Predictive Value for Assumed Major Depression Prevalence of 5-25%, Based on Accuracy Estimates Among Studies With a Semi-structured Reference Standard and PHQ-9 Scores Available

**eTable 1.** Characteristics of Included Primary Studies as Well as Eligible Primary Studies Not Included in the Present Study

**eTable 2.** Numbers of Participants and Cases of Major Depression by Diagnostic Interview

**eTable 3.** Estimates of Heterogeneity at PHQ-2 Cutoff Score of 2 and 3

**eTable 4.** Comparison of PHQ-2 Sensitivity and Specificity Estimates Among Participants Verified to Not Currently be Diagnosed or Receiving Treatment for a Mental Health Problem Compared to All Participants as Well as Among Participant Subgroups Based on Age, Sex, Human Development Index, Care Setting, and Risk of Bias Factors, for Each Reference Standard Category

**eTable 5.** Sensitivity and Specificity Estimates for the PHQ-2 Alone, the PHQ-9 Alone, and for PHQ-2  $\geq$  2 Followed by PHQ-9 Among 44 Studies (N Participants = 10,627; N Major Depression = 1,361) That Used a Semi-structured Reference Standard and Had Both PHQ-2 and PHQ-9 Item Scores Available

**eTable 6.** Comparison of Sensitivity and Specificity for PHQ-2  $\geq$  2 in Combination With PHQ-9  $\geq$  5 to 15 Versus Sensitivity and Specificity for PHQ-9  $\geq$  5 to 15, Among Studies That Used a Semi-structured Diagnostic Interview as the Reference Standard

**eTable 7.** QUADAS-2 Ratings for Each Primary Study Included in the Present Study

This supplementary material has been provided by the authors to give readers additional information about their work.

## eMethods 1. Search strategies

### MEDLINE (OvidSP)

1. PHQ\*.af.
2. patient health questionnaire\*.af.
3. 1 or 2
4. Mass Screening/
5. Psychiatric Status Rating Scales/
6. "Predictive Value of Tests"/
7. "Reproducibility of Results"/
8. exp "Sensitivity and Specificity"/
9. Psychometrics/
10. Prevalence/
11. Reference Values/
- 12.. Reference Standards/
13. exp Diagnostic Errors/
14. Mental Disorders/di, pc [Diagnosis, Prevention & Control]
15. Mood Disorders/di, pc [Diagnosis, Prevention & Control]
16. Depressive Disorder/di, pc [Diagnosis, Prevention & Control]
17. Depressive Disorder, Major/di, pc [Diagnosis, Prevention & Control]
18. Depression, Postpartum/di, pc [Diagnosis, Prevention & Control]
19. Depression/di, pc [Diagnosis, Prevention & Control]
20. validation studies.pt.
21. comparative study.pt.
22. screen\*.af.
23. prevalence.af.
24. predictive value\*.af.
25. detect\*.ti.
26. sensitiv\*.ti.
27. valid\*.ti.
28. revalid\*.ti.
29. predict\*.ti.
30. accur\*.ti.
31. psychometric\*.ti.
32. identif\*.ti.
33. specificit\*.ab.
34. cut?off\*.ab.
35. cut\* score\*.ab.
36. cut?point\*.ab.
37. threshold score\*.ab.
38. reference standard\*.ab.
39. reference test\*.ab.
40. index test\*.ab.
41. gold standard.ab.
42. or/4-41
43. 3 and 42
44. limit 43 to yr="2000-Current"

## PsycINFO (OvidSP)

1. PHQ\*.af.
2. patient health questionnaire\*.af.
3. 1 or 2
4. Diagnosis/
5. Medical Diagnosis/
6. Psychodiagnosis/
7. Misdiagnosis/
8. Screening/
9. Health Screening/
10. Screening Tests/
11. Prediction/
12. Cutting Scores/
13. Psychometrics/
14. Test Validity/
15. screen\*.af.
16. predictive value\*.af.
17. detect\*.ti.
18. sensitiv\*.ti.
19. valid\*.ti.
20. revalid\*.ti.
21. accura\*.ti.
22. psychometric\*.ti.
23. specificit\*.ab.
24. cut?off\*.ab.
25. cut\* score\*.ab.
26. cut?point\*.ab.
27. threshold score\*.ab.
28. reference standard\*.ab.
29. reference test\*.ab.
30. index test\*.ab.
31. gold standard.ab.
32. or/4-31
33. 3 and 32
38. Limit 33 to "2000 to current"

## Web of Science (Web of Knowledge)

#1: TS=(PHQ\* OR "Patient Health Questionnaire\*")

#2: TS= (screen\* OR prevalence OR "predictive value\*" OR detect\* OR sensitiv\* OR valid\* OR revalid\* OR predict\* OR accura\* OR psychometric\* OR identif\* OR specificit\* OR cutoff\* OR "cut off\*" OR "cut\* score\*" OR cutpoint\* OR "cut point\*" OR "threshold score\*" OR "reference standard\*" OR "reference test\*" OR "index test\*" OR "gold standard")

#1 AND #2

Indexes=SCI-EXPANDED, SSCI, A&HCI, CPCI-S, CPCI-SSH Timespan=2000-2018

## eMethods 2. Quality Assessment of Diagnostic Accuracy Studies-2 (QUADAS-2) coding manual for primary studies included in the present study

### **Domain 1: Participant Selection**

1. **Signalling question 1 – Was a consecutive or random sample of patients enrolled?:** Code as “yes” if a consecutive or random sample of participants were recruited for the study and the percentage of eligible participants who participate is  $\geq 75\%$ . If the study indicates that consecutive or random participants were recruited, but does not give an indication of the total number of eligible participants and how many agreed to participate in the study, this should be rated “unclear”. If the percentage of eligible participants included in the study was between  $\geq 50\%$  and  $< 75\%$ , then this should also be marked as “unclear”. If a very low rate of eligible participants ( $< 50\%$ ) were included in the study, this should be coded “no.” In “Notes”, please provide the relevant numbers and percentages used to make a determination. If a convenience sample of participants was recruited for the study or if the study was a case-control design, code as “no”.
2. **Signalling question 2 – Was a case-control design avoided?:** Code as “yes” if the study did not employ a case-control design. Code as “no” if the study used a case-control design.
3. **Signalling question 3 – Did the study avoid inappropriate exclusions?:** Inappropriate exclusions refer to situations where an important part of the screening population was excluded from the study based on characteristics that could be related to screening results. Code as “yes” if the study does not inappropriately exclude participants. Code as “no” if the study inappropriately excludes participants.
4. **Overall risk of bias:** Rate as “low”, “high”, or “unclear” as described in QUADAS-2. Please indicate factors in decision in “Notes”. NOTE: if signalling question 1 was coded “Unclear” the overall risk of bias is either a) Unclear, in cases where the denominator is not specified, or the percentage cannot be calculated, or method of participant selection is unclear OR b) Low, in cases where the percentage can be calculated, and is between 50-75%. If signalling question 1 is a “no” and signalling questions 2 and 3 are both “yes” then the risk of bias is coded “Unclear”.
5. **Applicability concerns:** Code as “low” if study excluded participants who were already diagnosed or treated for depression or if the study included these patients, but they can be excluded using the individual patient data. Also code as “low” if the study did not exclude participants already diagnosed with depression and the overall percentage of these participants is low (e.g.,  $\leq 2.0\%$  of total participants), even if there is not a variable to exclude them. Code “unclear” if the study did not exclude participants already diagnosed or treated for depression and it is not known how many diagnosed and treated patients were included or if the percentage is moderate (e.g.,  $> 2.0\%$  but  $\leq 5.0\%$ ). Code “high” if already diagnosed and treated patients are included and make up  $> 5.0\%$  of the total sample and there is not a variable to exclude them. Please see aggregated study information sheet to code this.

### **Domain 2: Index Test**

1. **Signalling question 1 - Were the index test results interpreted without the knowledge of the results of the reference standard?:** Code this item as “N/A” for all studies, as the index test is scored and does not require interpretation.
2. **Signalling question 2 - If a threshold was used, was it pre-specified?:** Code this item as “N/A” for all studies, as individual participant data allows for testing at all thresholds/cut-offs.
3. **Overall risk of bias:** Rate this item as “low” for all studies since the interpretation of the index test is fully automated in scoring self-report depressive symptom questionnaires and the individual participant data allows for testing at all thresholds/cut-offs.

4. **Applicability concerns:** Code “low” if the standard language version of the index test was used or if a translated version was used with an appropriate translation and back-translation process, or a translated version is located online. Code “unclear” if a translated version was used and it is not clear what steps were taken to ensure the quality of the translation or if only forward translation was used.

### **Domain 3: Reference Standard**

1. **Signalling question 1 – Is the reference standard likely to correctly classify the condition?:** This question will be coded as “yes” for all studies because the use of a validated semi- or fully structured psychiatric interview to assess participants for a DSM or ICD diagnosis of MDD/MDE is an eligibility requirement.
2. **Signalling question 2 – Were the reference standard results interpreted without knowledge of the results of the index test?:** Code as “yes” if the person administering the diagnostic interview was blinded to the participant’s score on the index test, or if the diagnostic interview was administered before the index test. Code as “no” if the person administering the diagnostic interview was not blinded or was aware of the participant’s score on the index test. Code as “unclear” if the study does not indicate whether blinding occurred and we cannot ascertain whether blinding occurred.
3. **Signalling question 3 – Did a qualified person administer the reference standard?:** For structured clinical interviews, this will typically be coded “yes” as no specific clinical training is required. For semi-structured interviews, this will be coded “yes” if a trained mental health diagnostician administered the clinical interview (e.g., psychiatrist, psychologist, clinician, social worker, general practitioner, psychiatric nurse) or if non-clinicians who have comprehensive diagnostic experience and documented adequate training administered the clinical interview (e.g. trained doctoral student, research assistant, nurse, nurse practitioner, advanced practice nurse). Code “no” if individuals without the required training administered the reference standard (e.g., student, research assistant, nurse without documented extensive training necessary). Code “unclear” if the characteristics of personnel who administered the diagnostic interview cannot be ascertained or if a vague description of training is provided (e.g., trained research assistants with no additional information). If the name of the interviewer is provided in the article, but no credentials are listed, then code based on credentials retrieved online for the interviewer.  
**Fully structured:** CIDI, DIS, MINI, CIS-R  
**Semi-structured:** SCID, SCAN, DISH, CIS
4. **Overall risk of bias:** The coding of this item should consider blinding of the person administering the diagnostic interview to the participant’s score on the index test and the qualifications of individuals administering the reference standard interview.
5. **Applicability concerns:** This item will be coded as “low” for most standard language studies, since the use of a validated semi- or fully structured psychiatric interview to assess participants for a DSM or ICD diagnosis of MDD/MDE is an eligibility requirement. For translated versions of a validated reference standard, code “low” if a translated version was used with an appropriate translation and back-translation process. Code “unclear” if a translated version was used and it is not clear what steps were taken to ensure the quality of the translation or if only forward translation was used.

### **Domain 4: Flow and Timing**

1. **Signalling question 1 – Was there an appropriate interval between index test and reference standard?:** Only patient data with two weeks or less between the index test and reference standard are included. Thus, code “yes” if index test and reference standard were administered within a week of each other. Code “unclear” if the period was greater than one week (but less than two weeks) or if the timing cannot be ascertained beyond knowing that it was < 2 weeks. Note that this item may be coded differently for different patients from the same study. Please see aggregated study information sheet to code this.

2. **Signalling question 2 – Did all patients receive a reference standard?:** This will typically be coded “yes”. If a portion of positive and negative screens receive the reference standard, and the patients selected were chosen randomly, code “yes”. If non-random selection based on clinical factors or the index test determined whether or not patients received a reference standard, then code “unclear” or “no”. An example of all patients not receiving a reference standard would occur, for instance, if patients who endorsed suicidality on the index test were referred for evaluation and did not receive the reference standard interview.
3. **Signalling question 3 – Did all patients receive the same reference standard?:** This question will typically be coded as “yes” for all studies, since the reference standard is almost always consistent within each study.
4. **Signalling question 4 – Were all patients included in the analysis?:** When coding for this question, compare the number of participants who received the index test to the number of participants who received the reference standard. Code as “yes” if at least 90% of participants who received the index test also received the reference standard, or vice versa, and were included in analyses. Code as “unclear” if this difference is  $\geq 80\%$ , but  $< 90\%$  or if it cannot be determined. Code as “no” if it is  $< 80\%$ . If the study used randomly selected patients for either the index test or the reference standard, do not count the participants who did not receive the reference standard for that reason as missing. In “Notes”, please provide the relevant numbers and percentages used to make a determination.
5. **Overall risk of bias:** Rate as “low”, “high”, or “unclear” risk of bias. Given that questions 2 and 3 will typically be coded as “yes”, use the following rules to code the overall risk of bias:

**SQ1 = UNCLEAR and SQ4 = YES:** code as UNCLEAR risk of bias

**SQ1 = UNCLEAR and SQ4 = UNCLEAR:** code as UNCLEAR risk of bias

**SQ1 = UNCLEAR and SQ4 = NO:** code as HIGH risk of bias if the % in SQ4 is  $< 50\%$  and code as UNCLEAR risk of bias if the % in SQ4 is  $\geq 50\%$

**SQ1 = YES and SQ4 = UNCLEAR:** code as UNCLEAR risk of bias

**SQ1 = YES and SQ4 = YES:** code as LOW risk of bias

**SQ1 = YES and SQ4 = NO:** code as HIGH risk of bias if the % in SQ4 is  $< 50\%$  and code as UNCLEAR risk of bias if the % in SQ4 is  $\geq 50\%$

**Note:** If “IPD” was selected for signalling question 1, and the overall risk of bias rating depends on the individual patient rating in signalling question 1, then rate as “IPD” and indicate which participants should receive which bias rating (for example, participants administered the reference standard within 1 week are rated as “low”, whereas those administered the reference standard within 1-2 weeks are rated as “unclear”).

Please indicate factors in decision in “Notes”.

**eFigure 1. Receiver operating characteristic (ROC) plots comparing sensitivity and specificity estimates for Patient Health Questionnaire-2 (PHQ-2) cutoffs 1-6 among semi-structured diagnostic interviews, fully structured diagnostic interviews, and the Mini International Neuropsychiatric Interview (MINI)<sup>a</sup>**

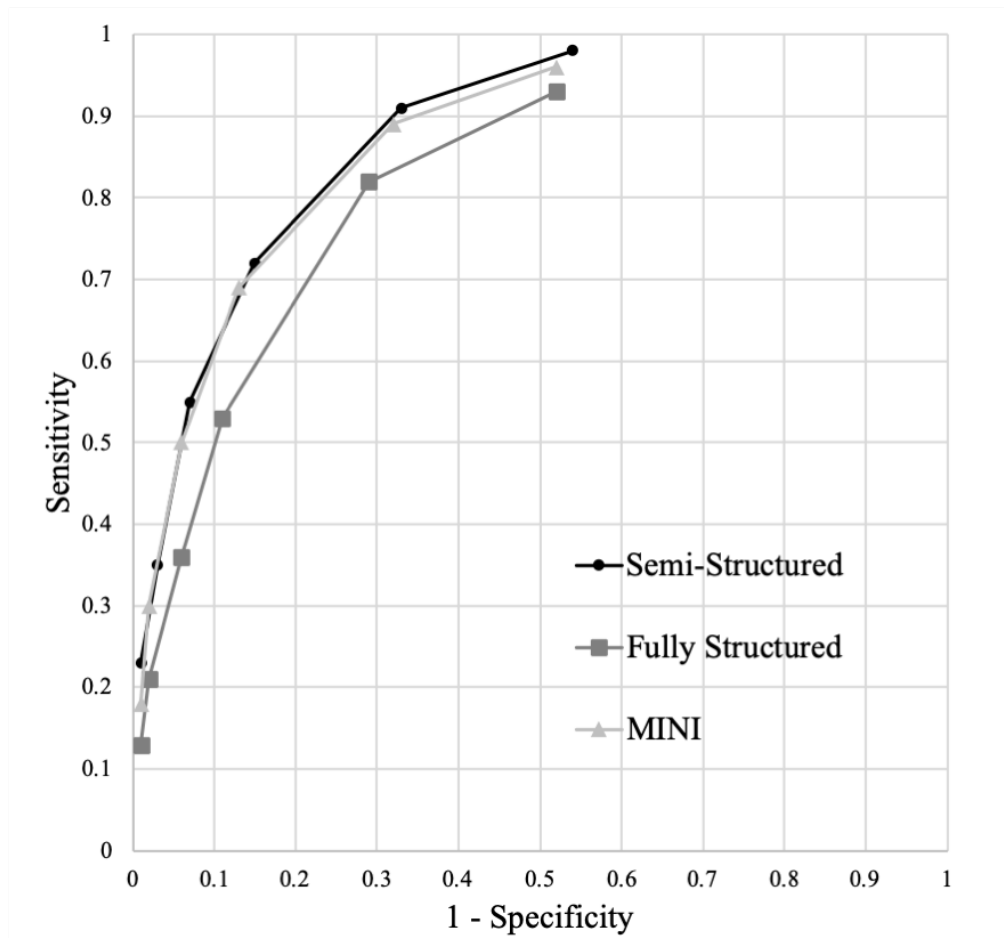

<sup>a</sup>Area under the curve and 95% confidence intervals: 0.875 (0.864, 0.887) for semi-structured interviews, 0.821 (0.807, 0.835) for fully structured interviews, and 0.866 (0.854, 0.877) for MINI

**eFigure 2a. Forest plots of sensitivity and specificity estimates for cutoff 2 of the PHQ-2, among studies that used a semi-structured diagnostic interview as the reference standard (N Studies = 48; N Participants = 11,703; N major depression = 1,538)**

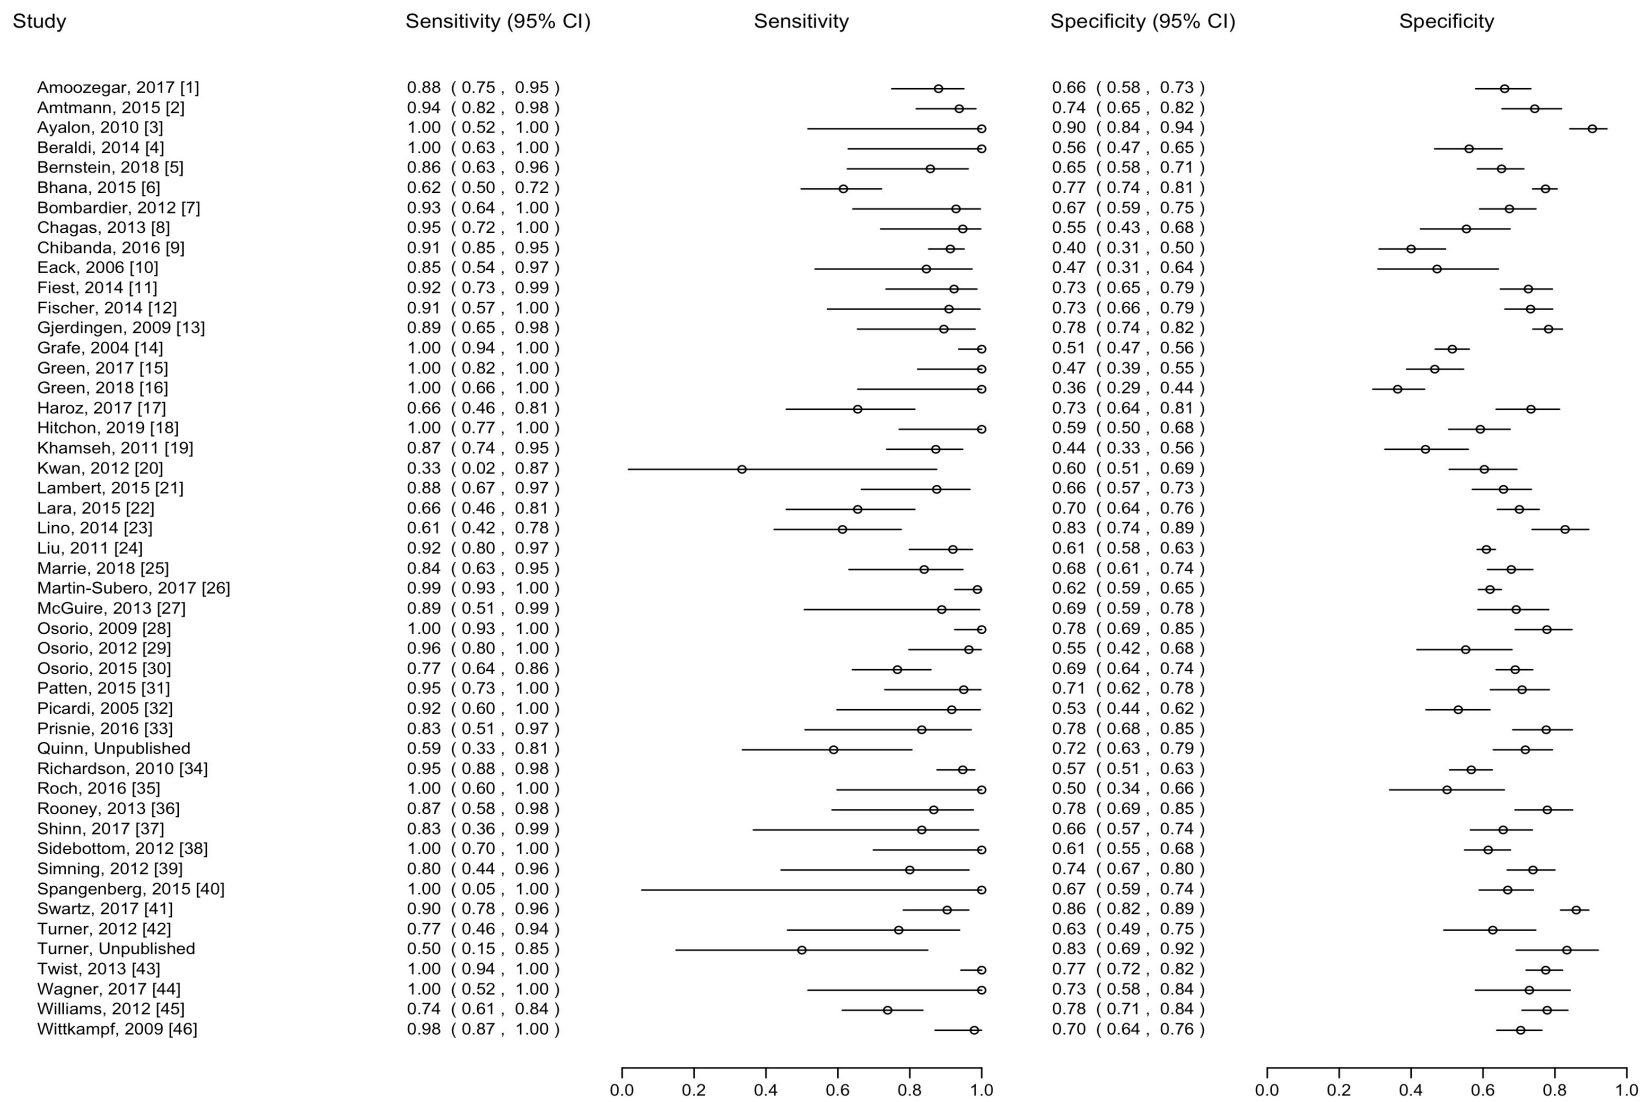



**eFigure 2b. Forest plots of sensitivity and specificity estimates for cutoff 2 of the PHQ-2 among participants verified to not currently be diagnosed or receiving treatment for a mental health problem, among studies that used a semi-structured diagnostic interview as the reference standard (N Studies = 25; N Participants = 3,708; N major depression = 527)**

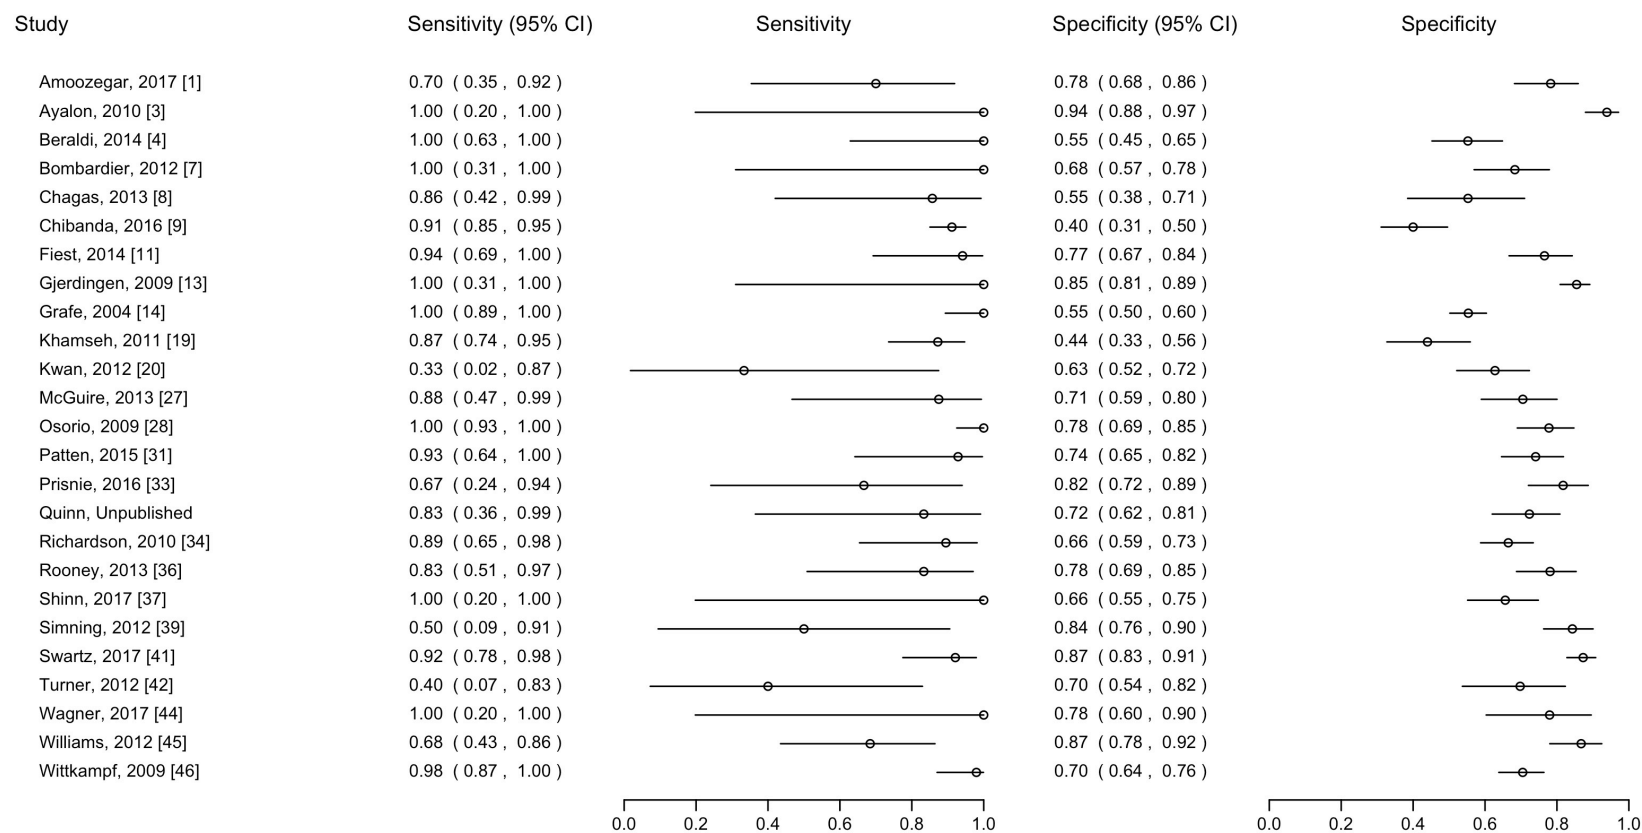

**eFigure 2c. Forest plots of sensitivity and specificity estimates for cutoff 2 of the PHQ-2 among participants aged < 60, among studies that used a semi-structured diagnostic interview as the reference standard (N Studies = 43; N Participants = 7,759; N major depression = 1,117)**

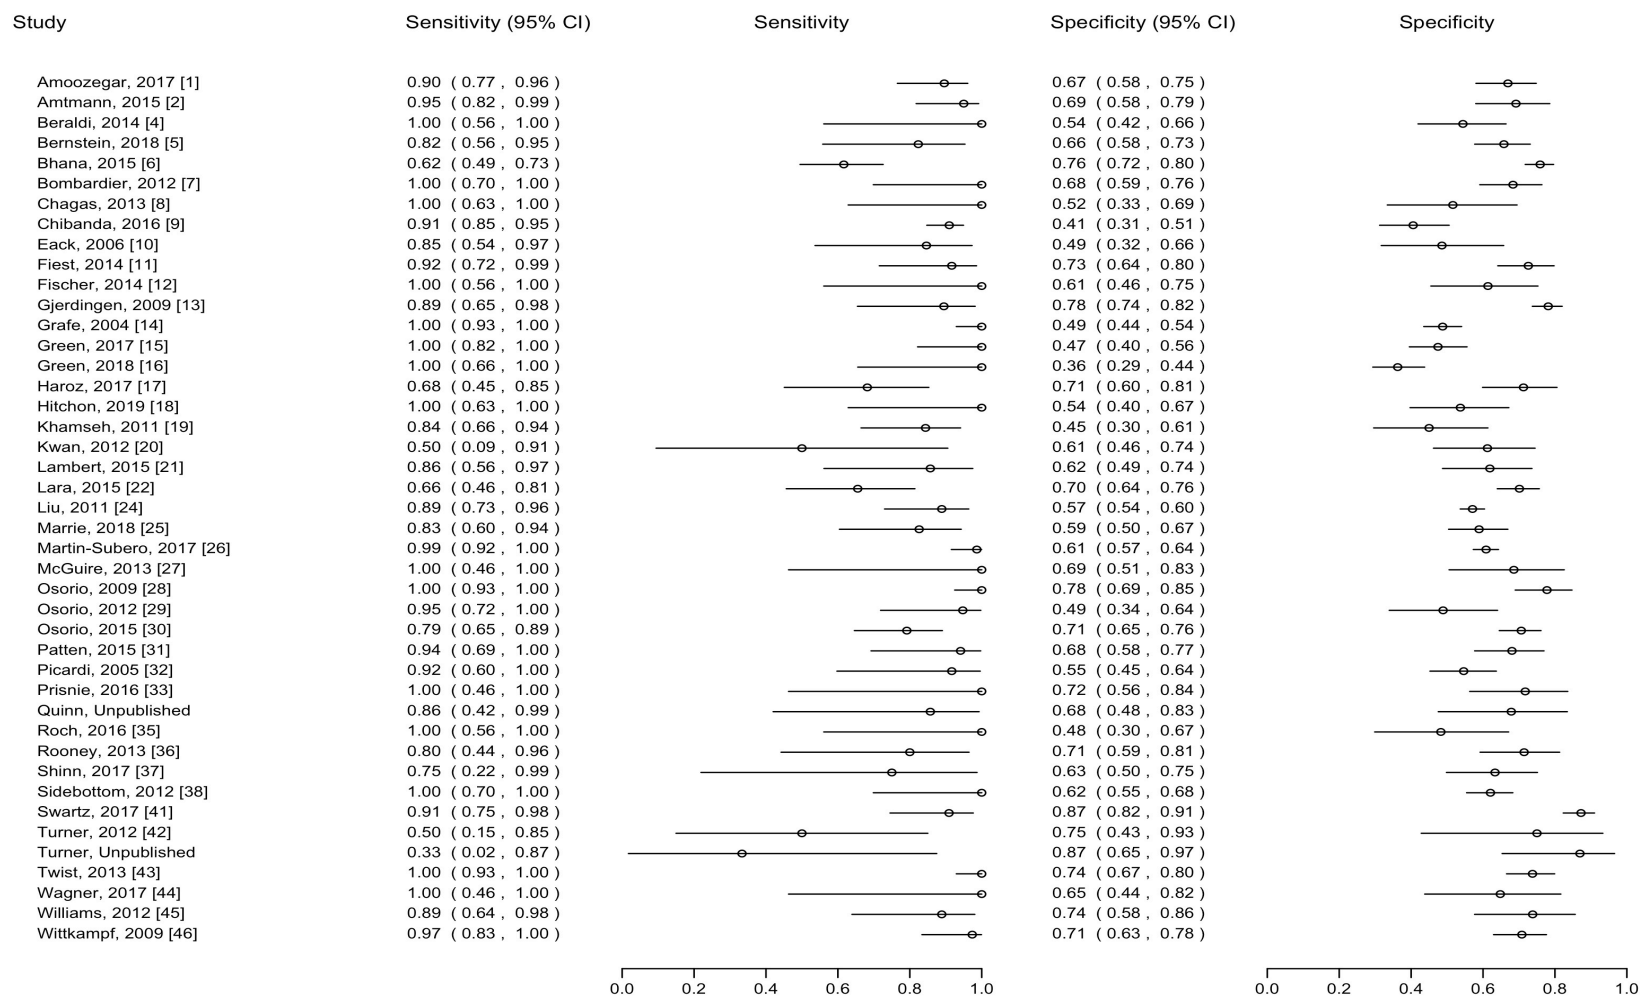

**eFigure 2d. Forest plots of sensitivity and specificity estimates for cutoff 2 of the PHQ-2 among participants aged  $\geq 60$ , among studies that used a semi-structured diagnostic interview as the reference standard (N Studies = 40; N Participants = 3,875; N major depression = 415)**

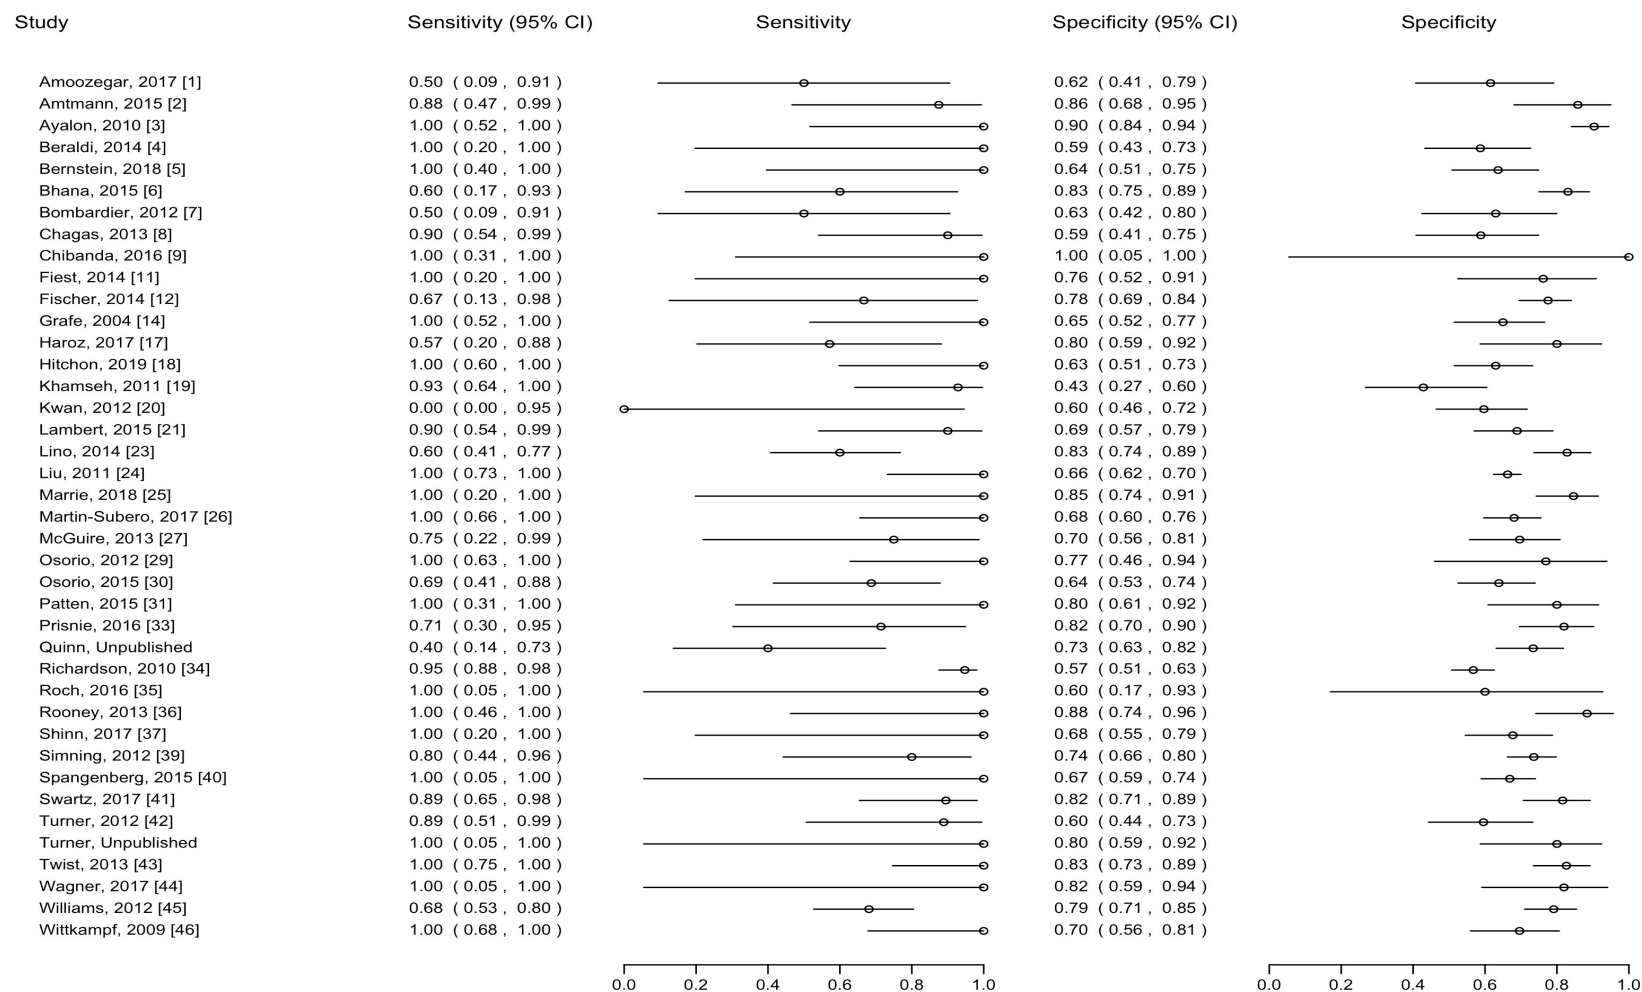

**eFigure 2e. Forest plots of sensitivity and specificity estimates for cutoff 2 of the PHQ-2 among women, among studies that used a semi-structured diagnostic interview as the reference standard (N Studies = 47; N Participants = 7,280; N major depression = 1,054)**

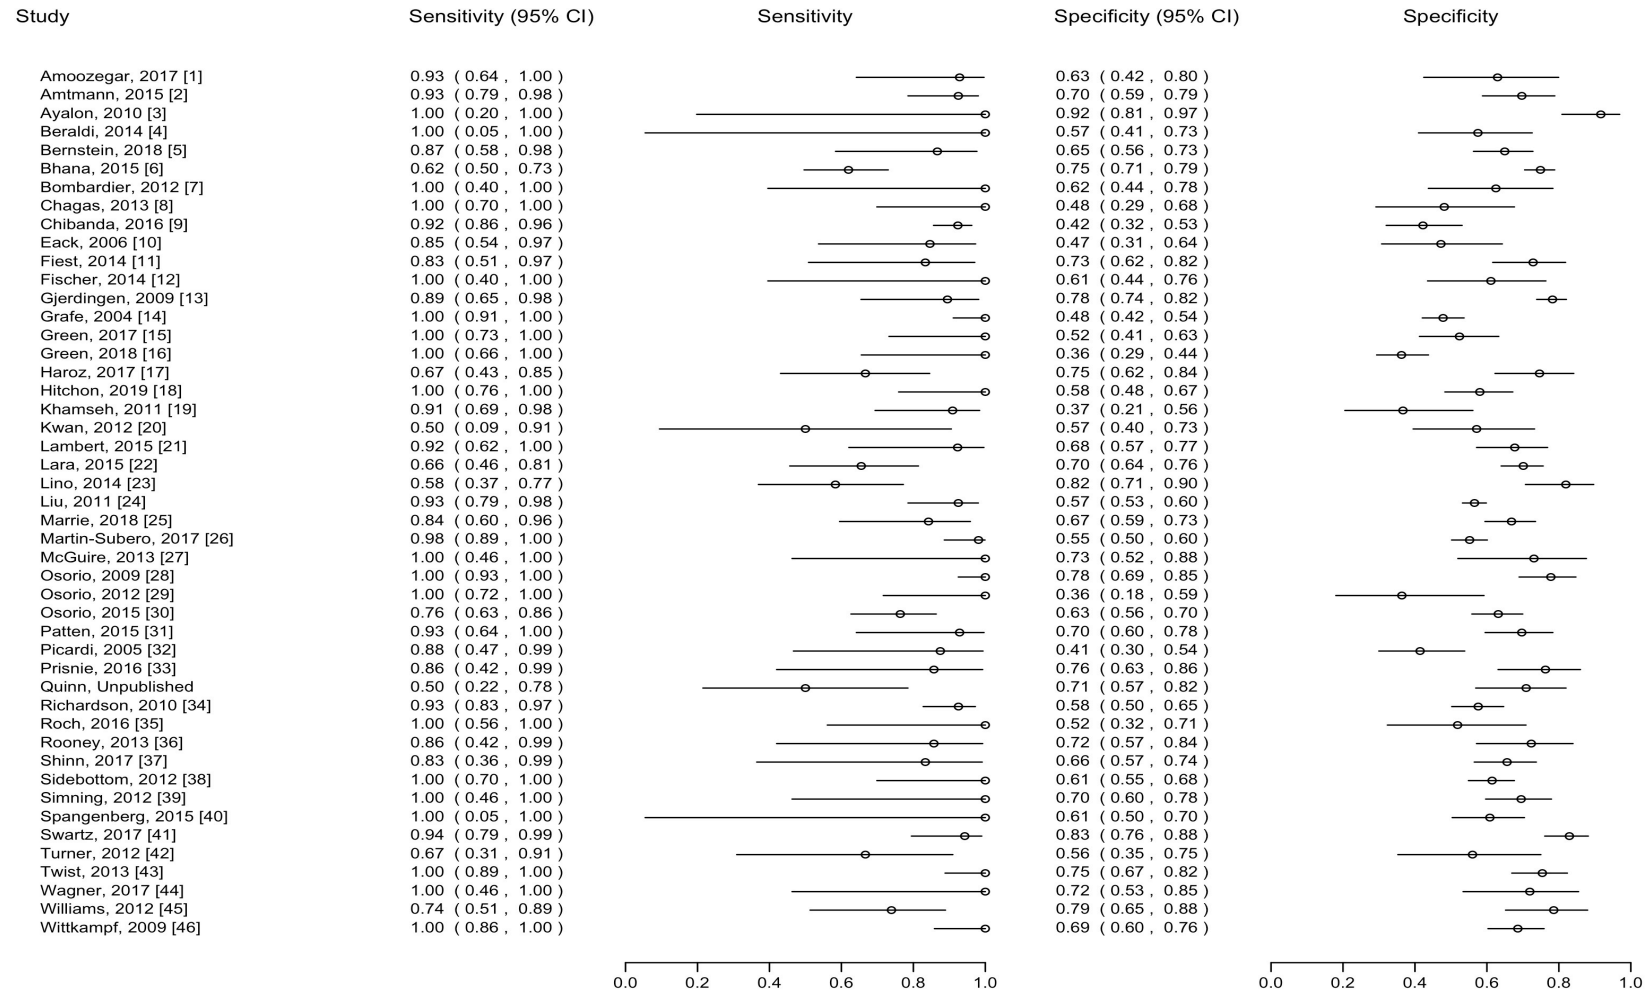

**eFigure 2f. Forest plots of sensitivity and specificity estimates for cutoff 2 of the PHQ-2 among men, among studies that used a semi-structured diagnostic interview as the reference standard (N Studies = 40; N Participants = 4,345; N major depression = 484)**

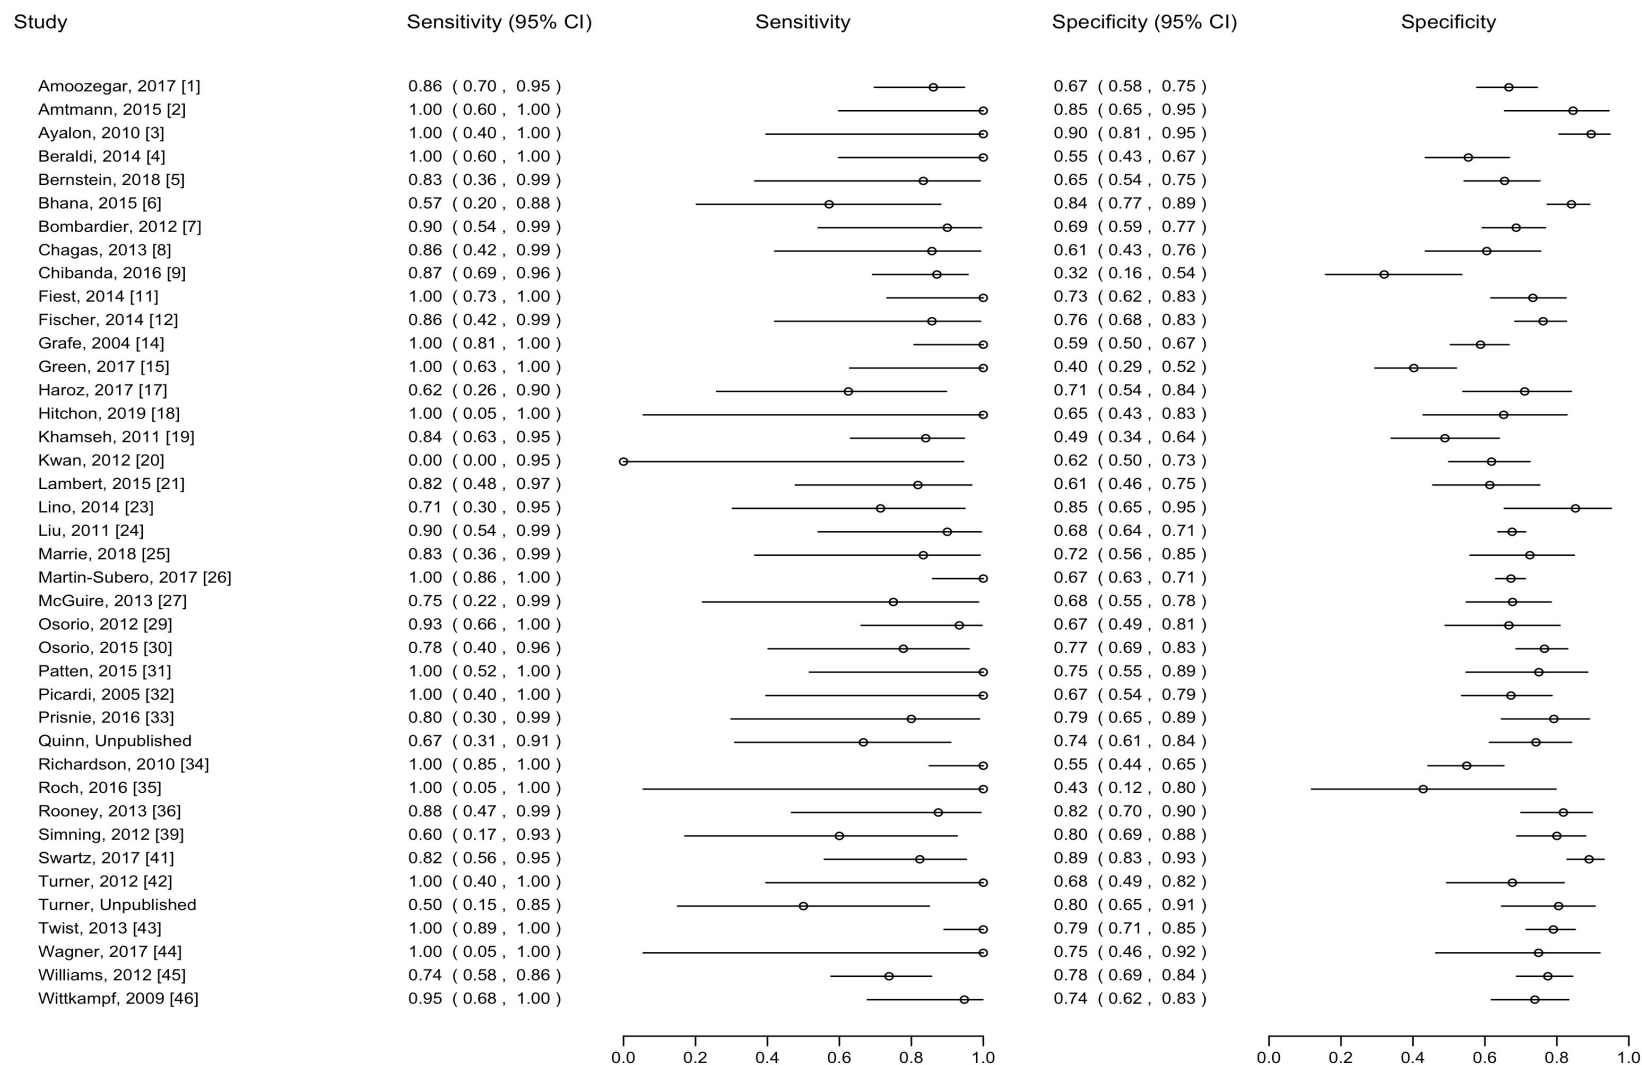

**eFigure 2g. Forest plots of sensitivity and specificity estimates for cutoff 2 of the PHQ-2 among participants from a country with a very high human development index, among studies that used a semi-structured diagnostic interview as the reference standard (N Studies = 37; N Participants = 9,156; N major depression = 994)**

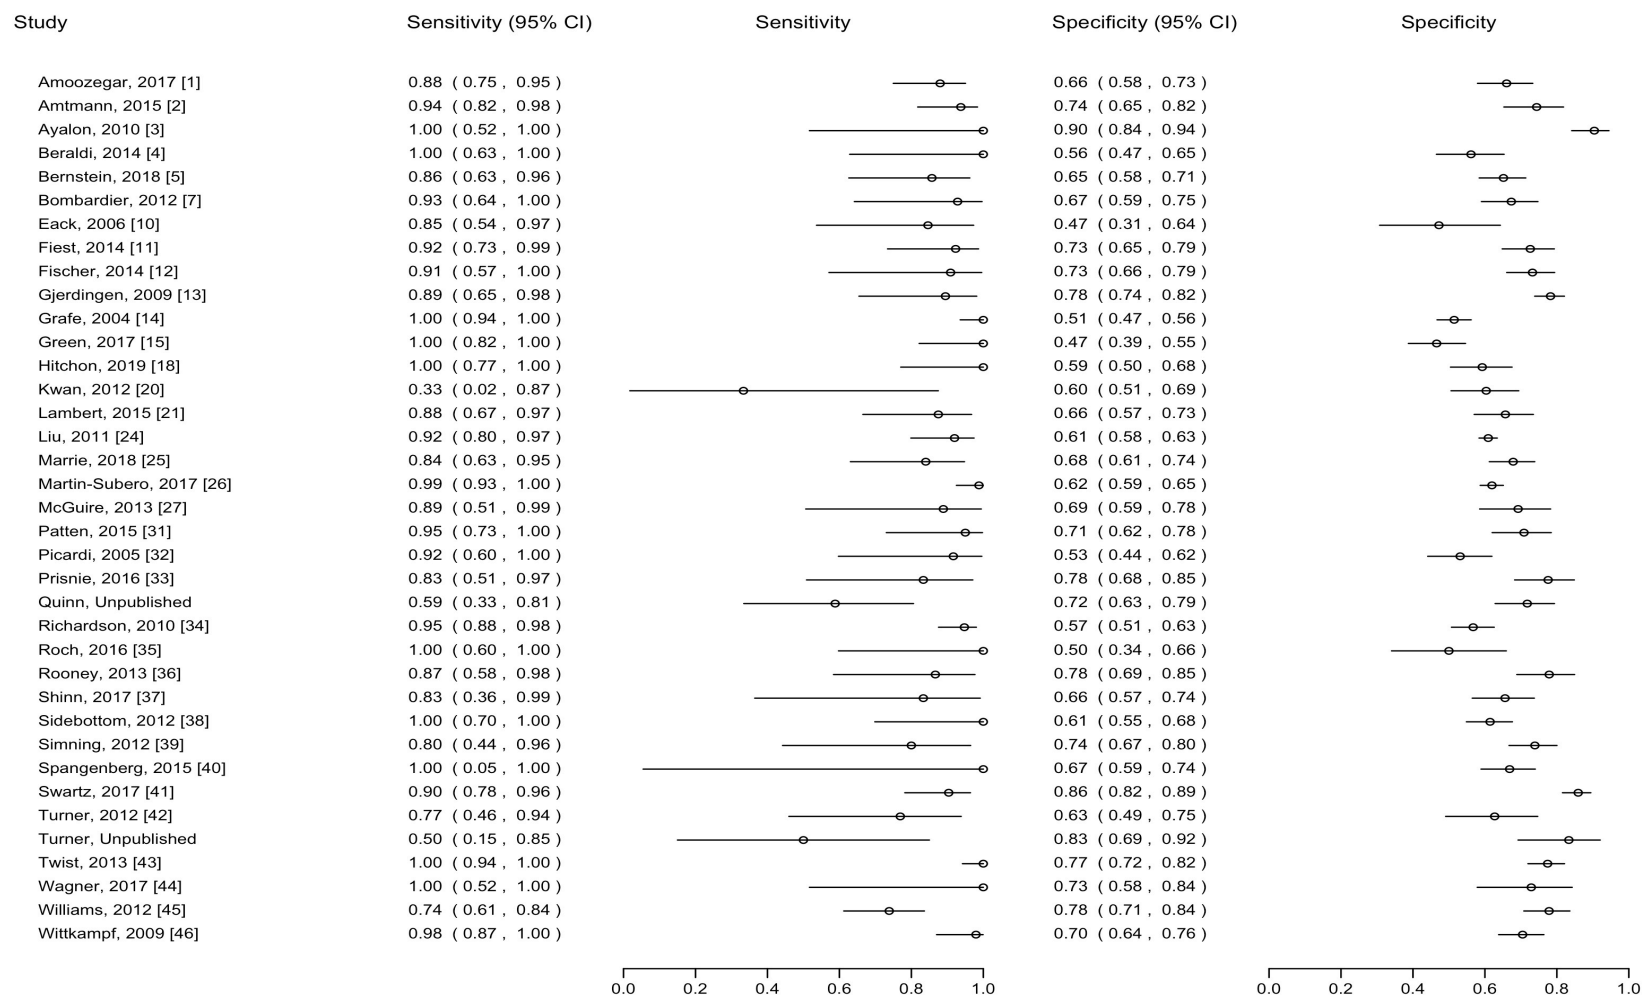

**eFigure 2h. Forest plots of sensitivity and specificity estimates for cutoff 2 of the PHQ-2 among participants from a country with a high human development index, among studies that used a semi-structured diagnostic interview as the reference standard (N**

Studies = 8; N Participants = 1,957; N major depression = 356)

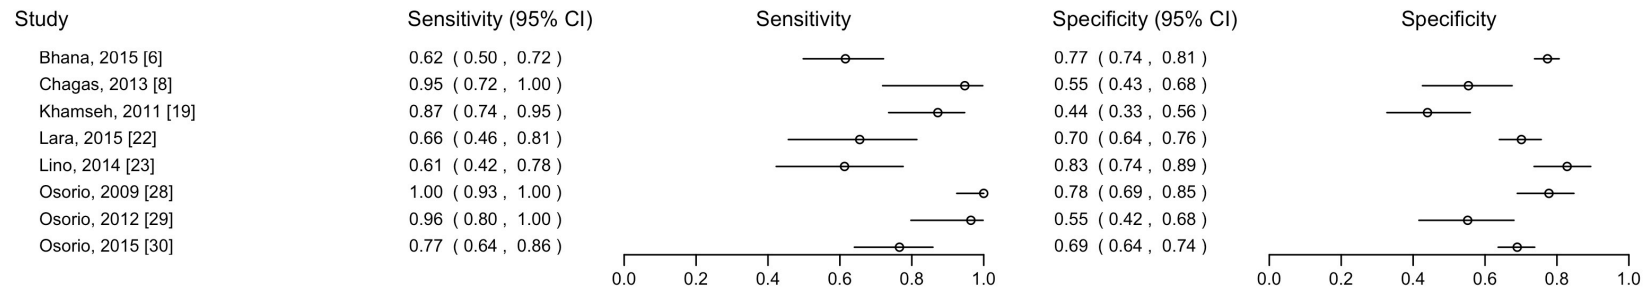

**eFigure 2i. Forest plots of sensitivity and specificity estimates for cutoff 2 of the PHQ-2 among participants from a country with a low-medium human development index, among studies that used a semi-structured diagnostic interview as the reference standard (N Studies = 3; N Participants = 590; N major depression = 188)**

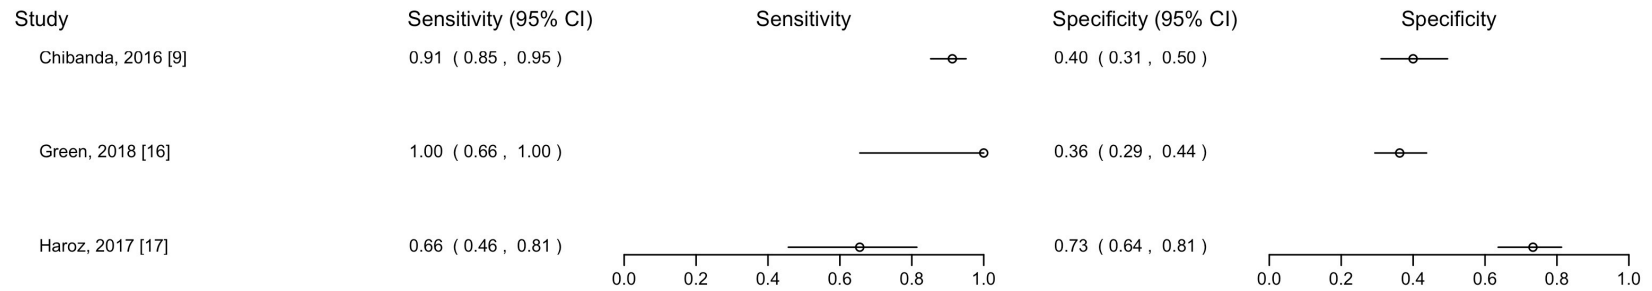



**eFigure 2j. Forest plots of sensitivity and specificity estimates for cutoff 2 of the PHQ-2 among participants from a non-medical setting, among studies that used a semi-structured diagnostic interview as the reference standard (N Studies = 2; N Participants = 567; N major depression = 105)**

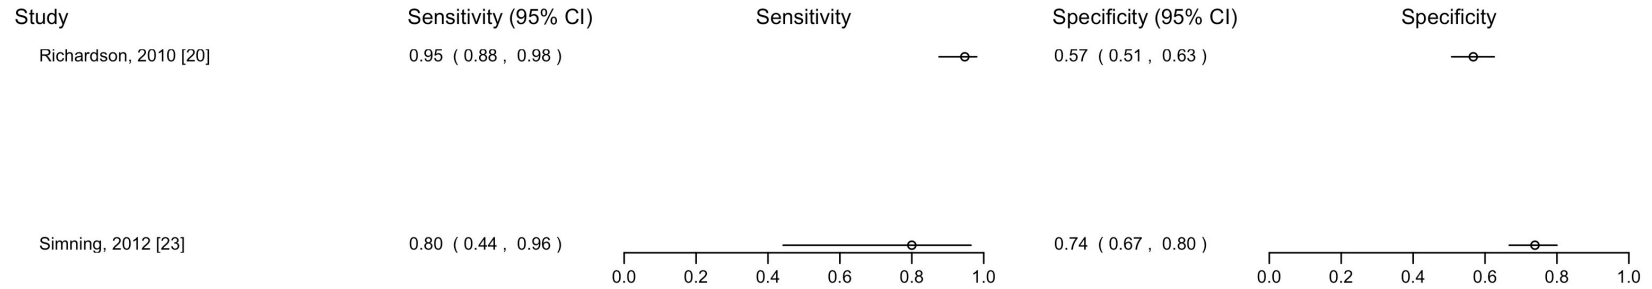

**eFigure 2k. Forest plots of sensitivity and specificity estimates for cutoff 2 of the PHQ-2 among participants from a primary care setting, among studies that used a semi-structured diagnostic interview as the reference standard (N Studies = 15; N Participants = 4,569; N major depression = 667)**

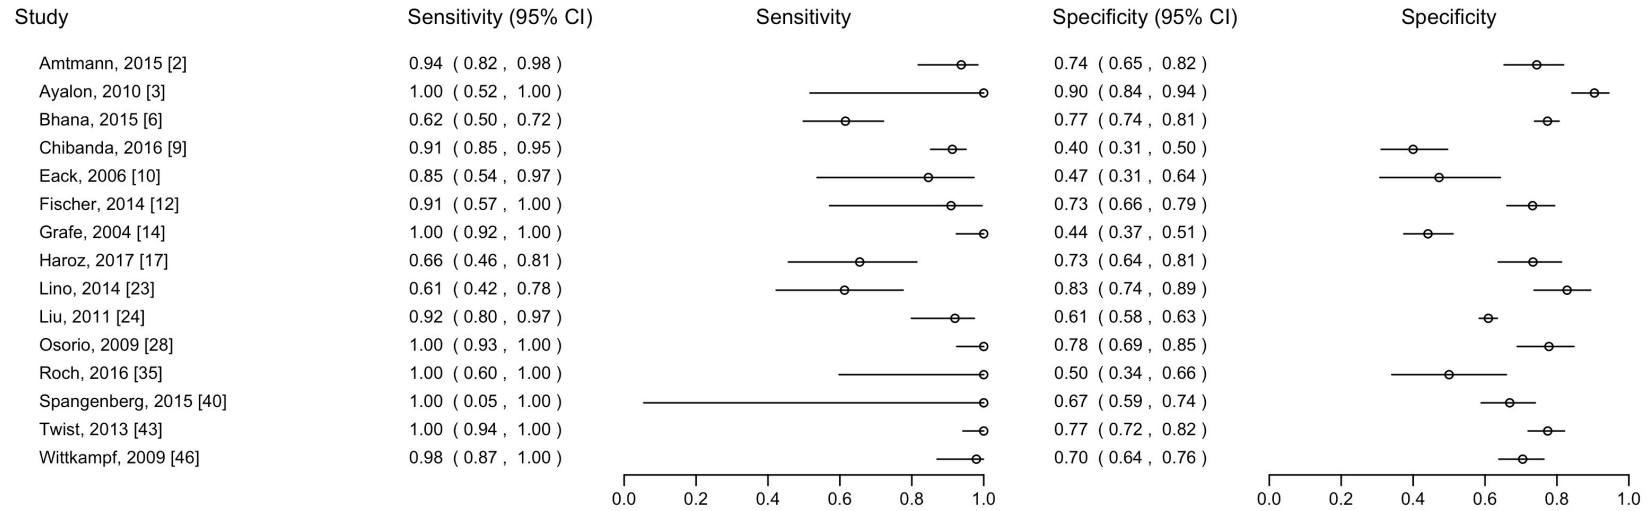

**eFigure 2I. Forest plots of sensitivity and specificity estimates for cutoff 2 of the PHQ-2 among participants from an inpatient specialty care setting, among studies that used a semi-structured diagnostic interview as the reference standard (N Studies = 10; N Participants = 2,019; N major depression = 184)**

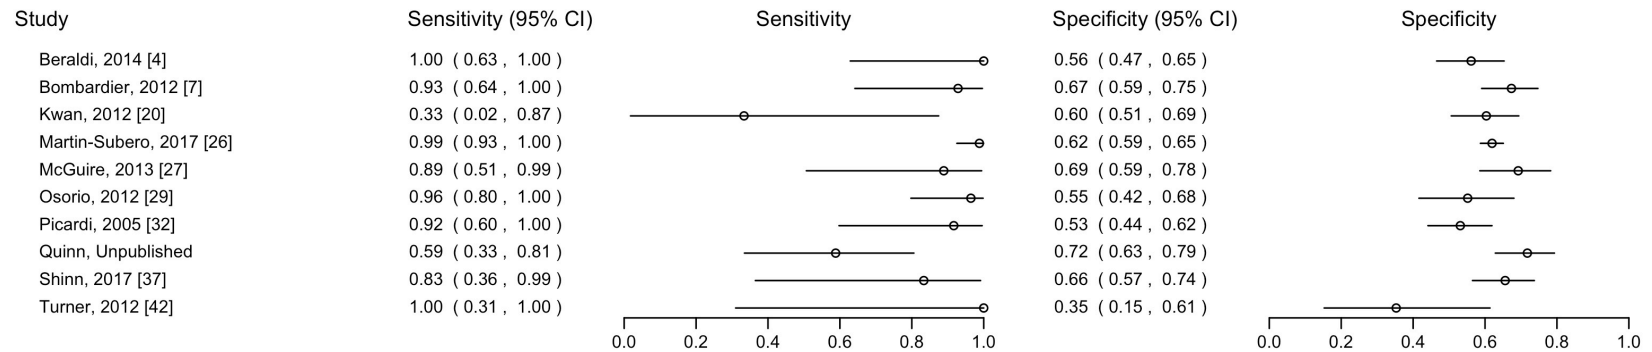

**eFigure 2m. Forest plots of sensitivity and specificity estimates for cutoff 2 of the PHQ-2 among participants from an outpatient specialty care setting, among studies that used a semi-structured diagnostic interview as the reference standard (N Studies = 23; N Participants = 4,548; N major depression = 582)**

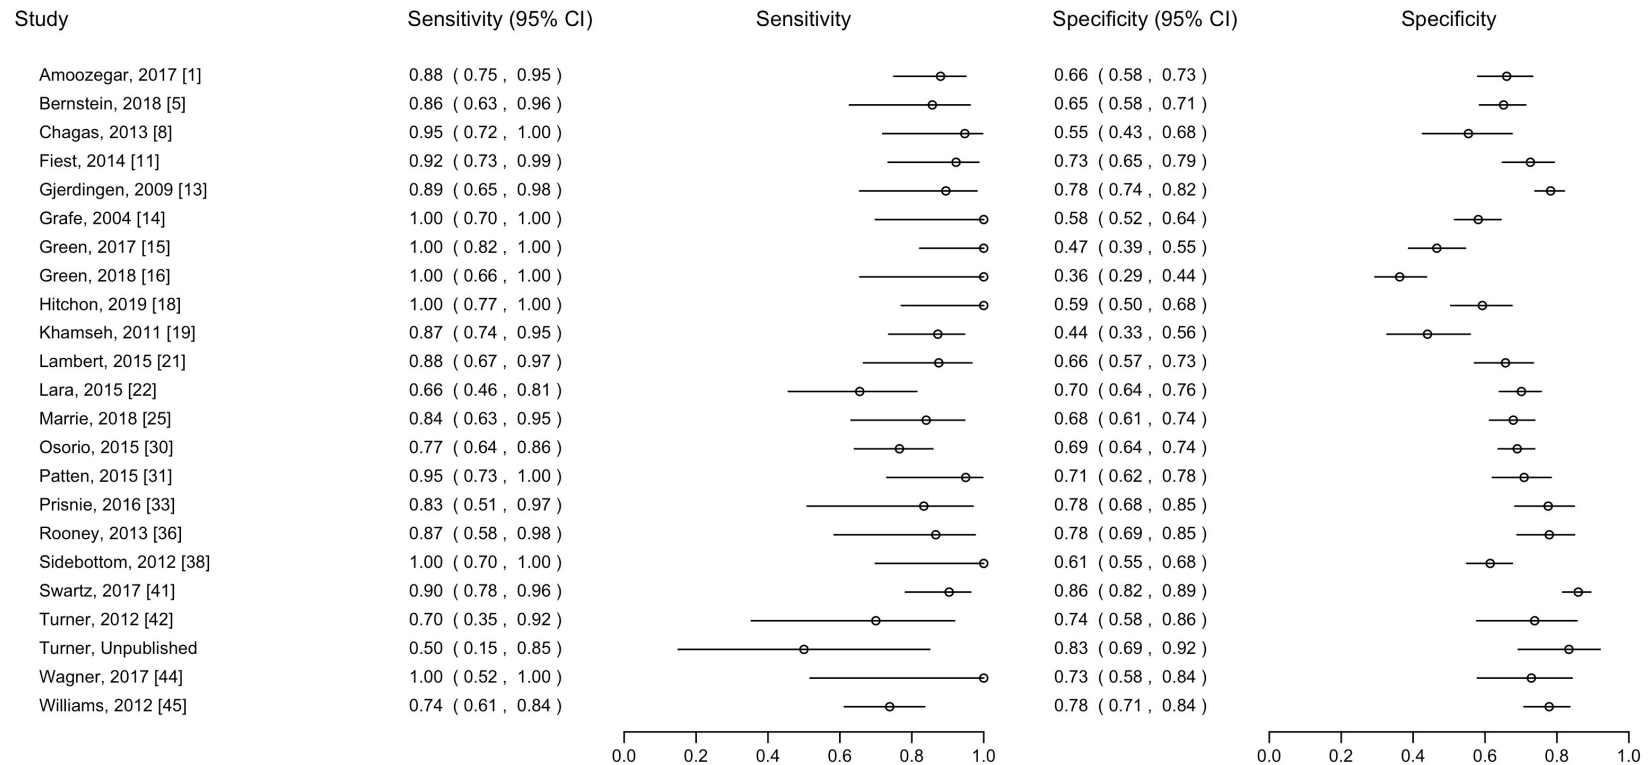

**eFigure 2n. Forest plots of sensitivity and specificity estimates for cutoff 2 of the PHQ-2, among studies that used a fully structured diagnostic interview as the reference standard (N Studies = 20; N Participants = 17,319; N major depression = 1,365)**

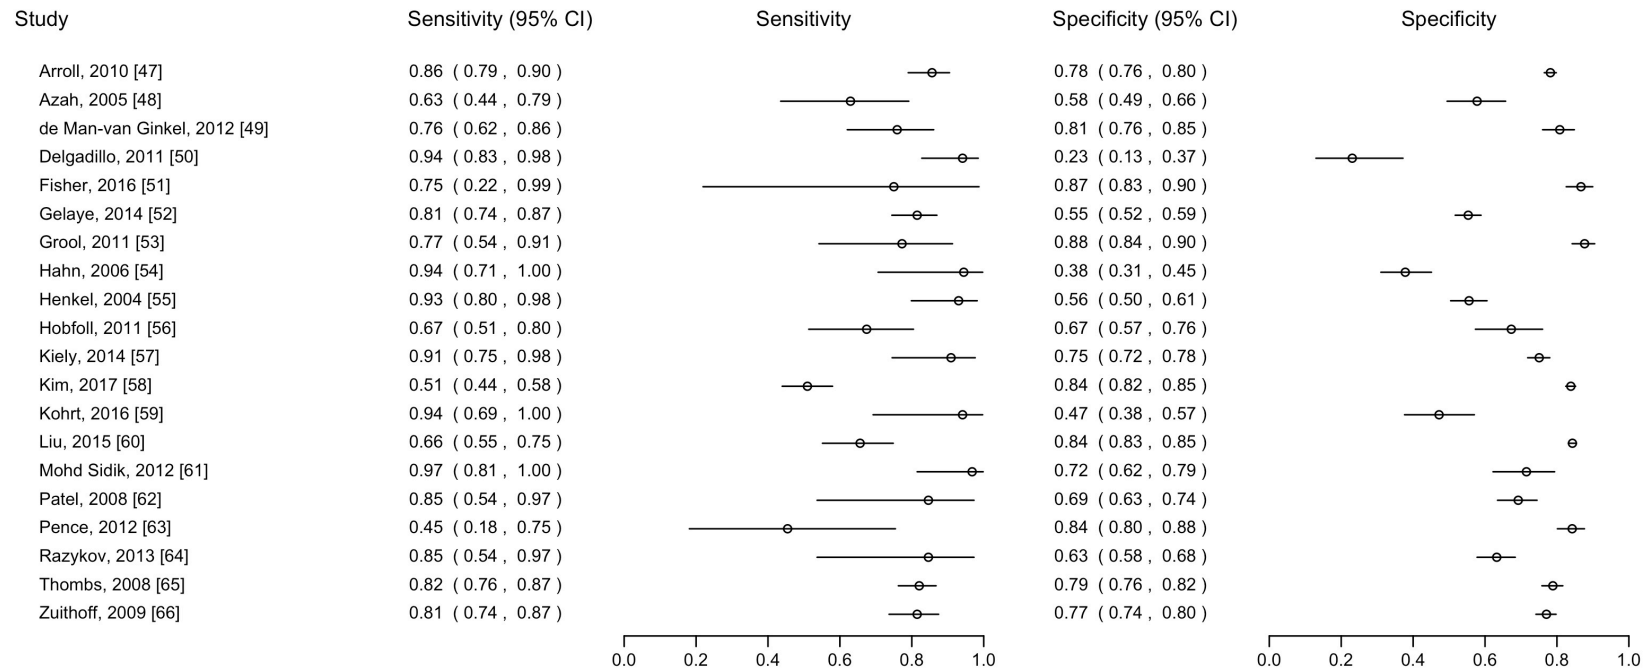

**eFigure 2o. Forest plots of sensitivity and specificity estimates for cutoff 2 of the PHQ-2 among participants verified to not currently be diagnosed or receiving treatment for a mental health problem, among studies that used a fully structured diagnostic interview as the reference standard (N Studies = 5; N Participants = 4,050; N major depression = 292)**

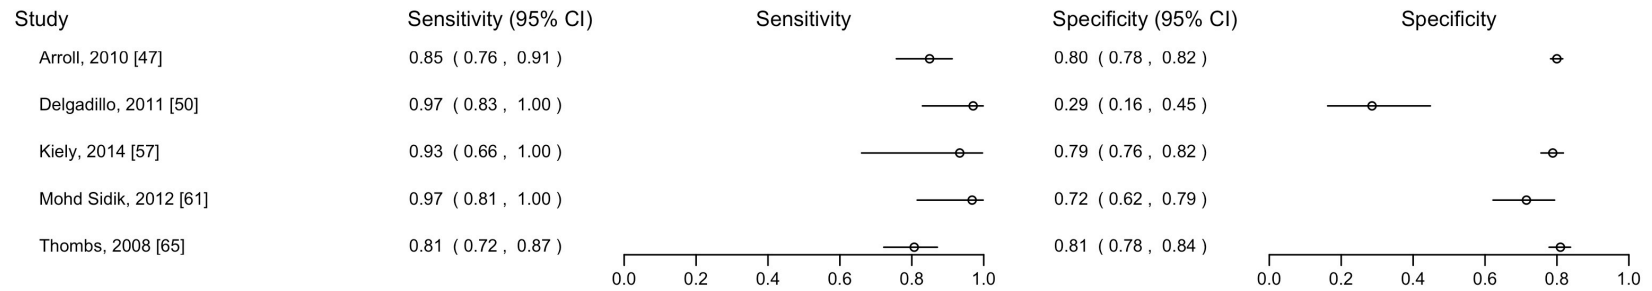

**eFigure 2p. Forest plots of sensitivity and specificity estimates for cutoff 2 of the PHQ-2 among participants aged < 60, among studies that used a fully structured diagnostic interview as the reference standard (N Studies = 20; N Participants = 13,901; N major depression = 1,097)**

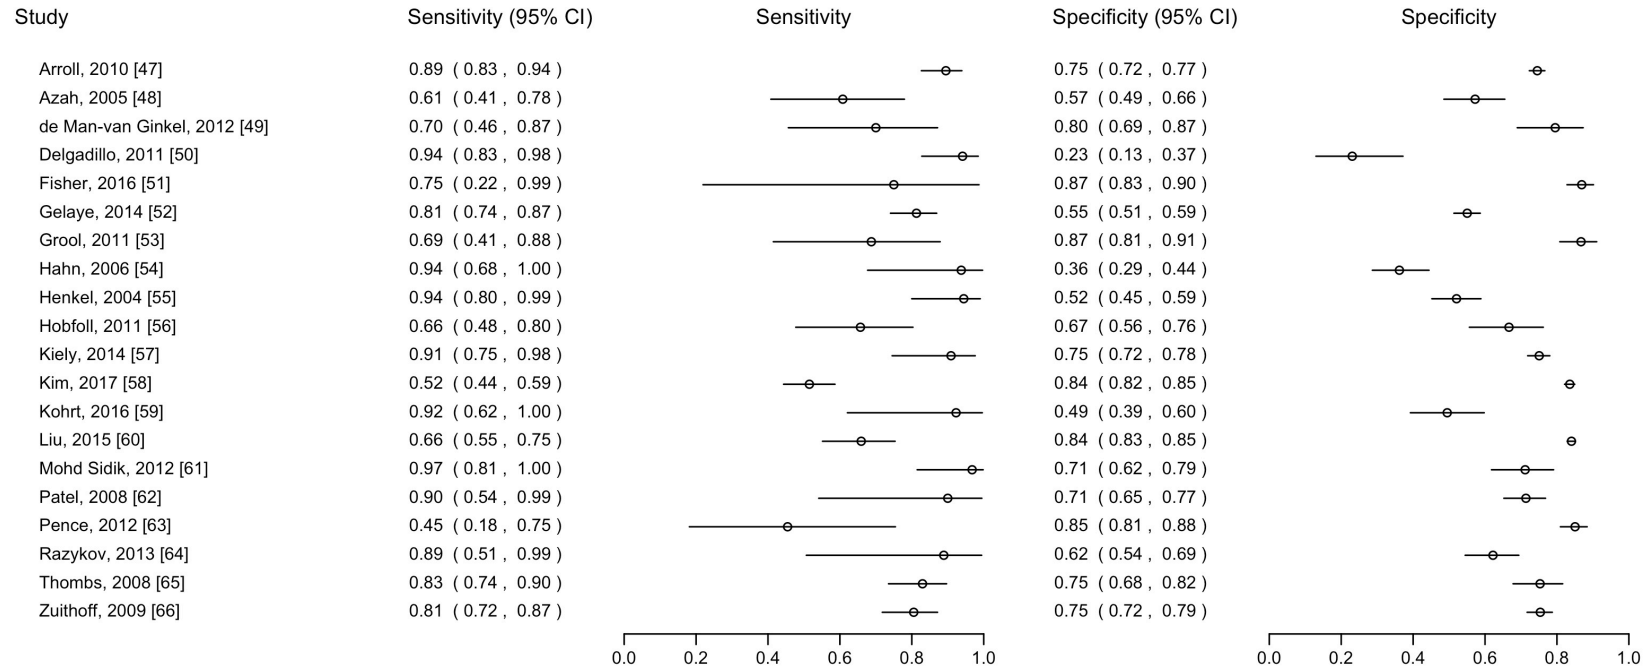

**eFigure 2q. Forest plots of sensitivity and specificity estimates for cutoff 2 of the PHQ-2 among participants aged  $\geq 60$ , among studies that used a fully structured diagnostic interview as the reference standard (N Studies = 15; N Participants = 3,400; N major depression = 268)**

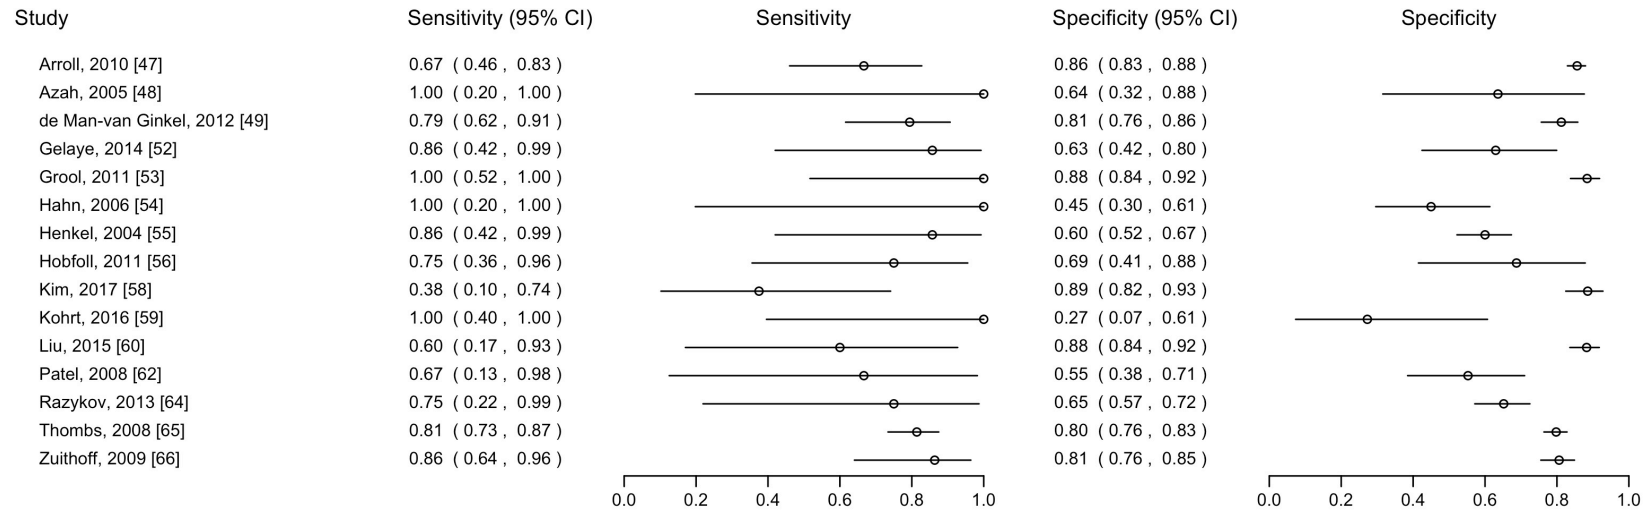



**eFigure 2r. Forest plots of sensitivity and specificity estimates for cutoff 2 of the PHQ-2 among women, among studies that used a fully structured diagnostic interview as the reference standard (N Studies = 20; N Participants = 9,690; N major depression = 802)**

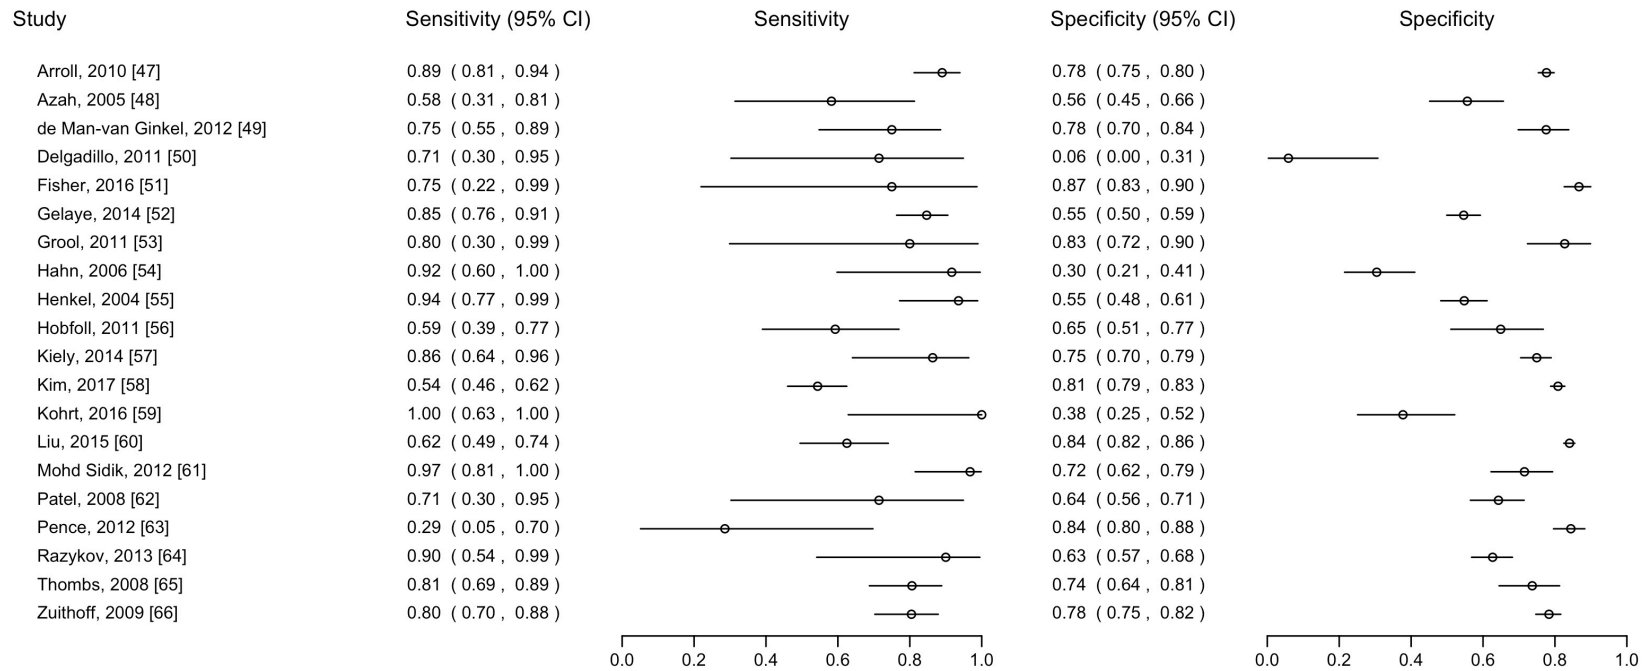

**eFigure 2s. Forest plots of sensitivity and specificity estimates for cutoff 2 of the PHQ-2 among men, among studies that used a fully structured diagnostic interview as the reference standard (N Studies = 18; N Participants = 7,619; N major depression = 561)**

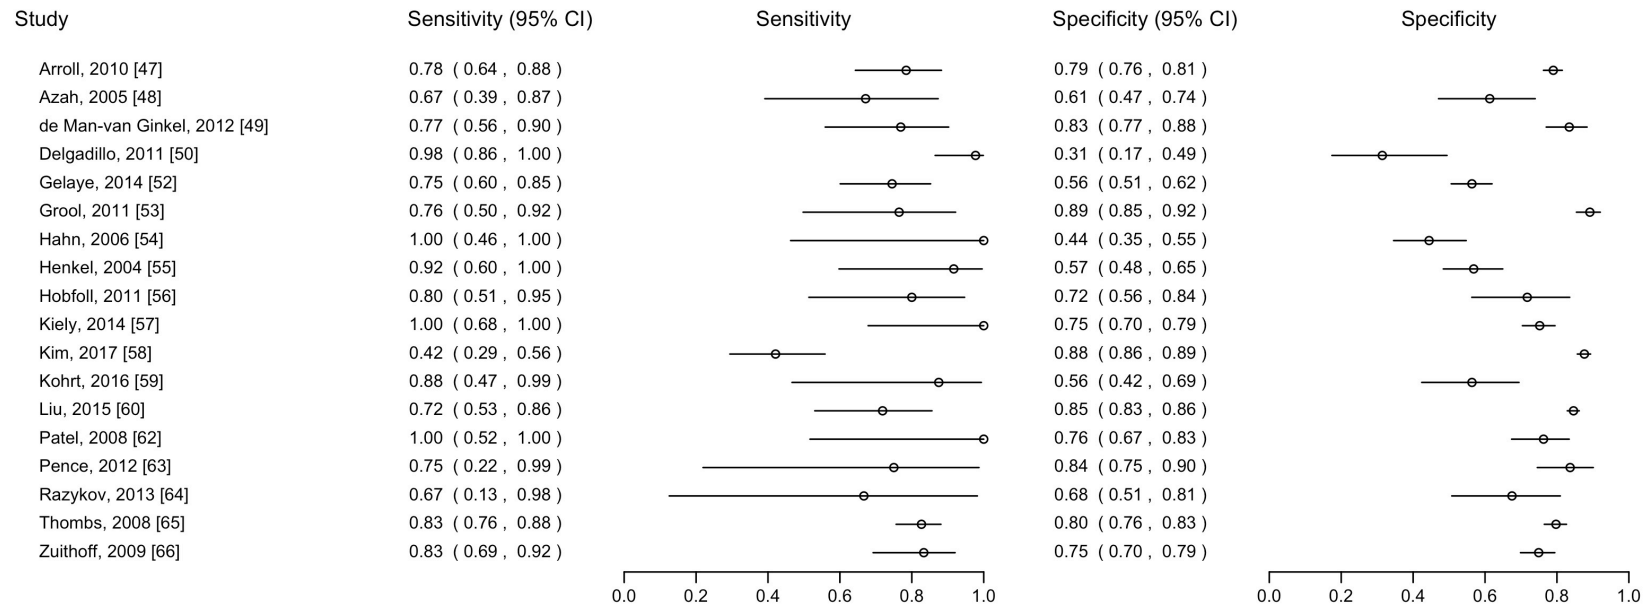

**eFigure 2t. Forest plots of sensitivity and specificity estimates for cutoff 2 of the PHQ-2 among participants from a country with a very high human development index, among studies that used a fully structured diagnostic interview as the reference standard**

(N Studies = 16; N Participants = 15,574; N major depression =1,162)

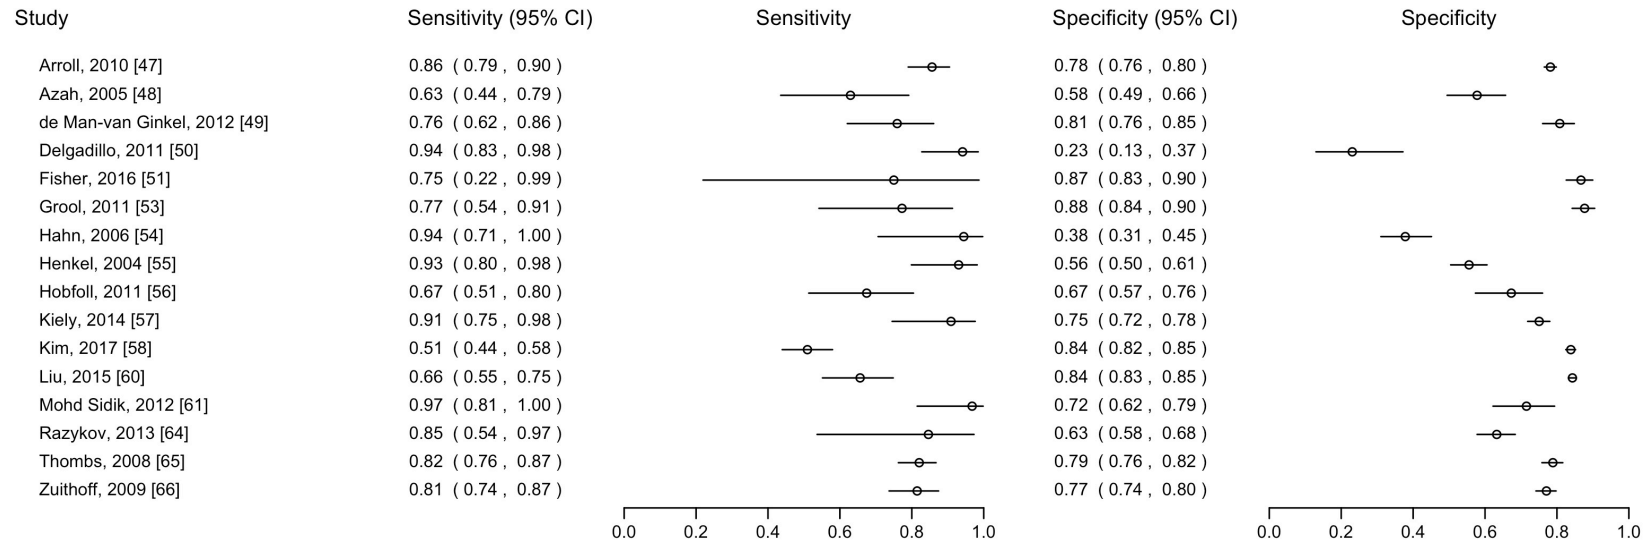

**eFigure 2u. Forest plots of sensitivity and specificity estimates for cutoff 2 of the PHQ-2 among participants from a country with a low-medium human development index, among studies that used a fully structured diagnostic interview as the reference standard (N Studies = 4; N Participants = 1,745; N major depression = 203)**

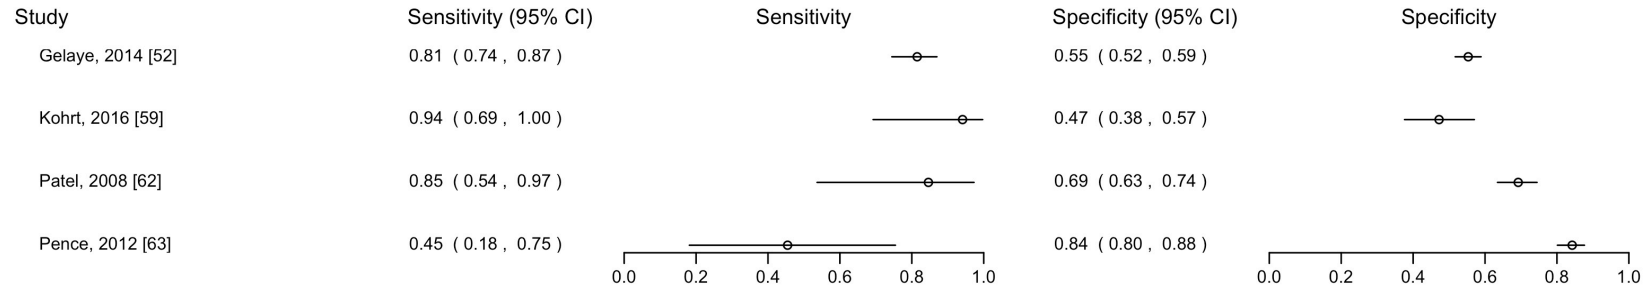

**eFigure 2v. Forest plots of sensitivity and specificity estimates for cutoff 2 of the PHQ-2 among participants from a non-medical setting, among studies that used a fully structured diagnostic interview as the reference standard (N Studies = 4; N Participants = 8,316; N major depression = 378)**

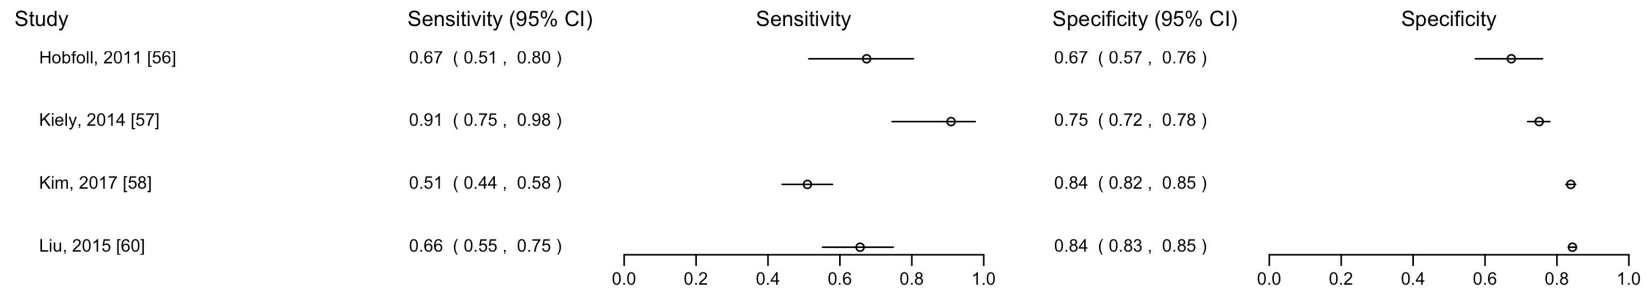

**eFigure 2w. Forest plots of sensitivity and specificity estimates for cutoff 2 of the PHQ-2 among participants from a primary care setting, among studies that used a fully structured diagnostic interview as the reference standard (N Studies = 7; N**

**Participants = 4,789; N major depression = 429)**

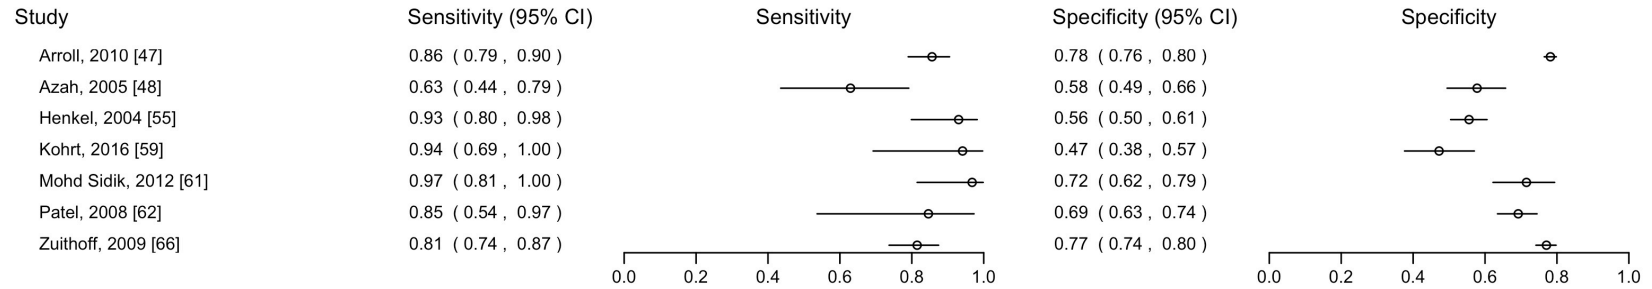

**eFigure 2x. Forest plots of sensitivity and specificity estimates for cutoff 2 of the PHQ-2 among participants from an inpatient specialty care setting, among studies that used a fully structured diagnostic interview as the reference standard (N Studies = 2; N Participants = 593; N major depression = 72)**

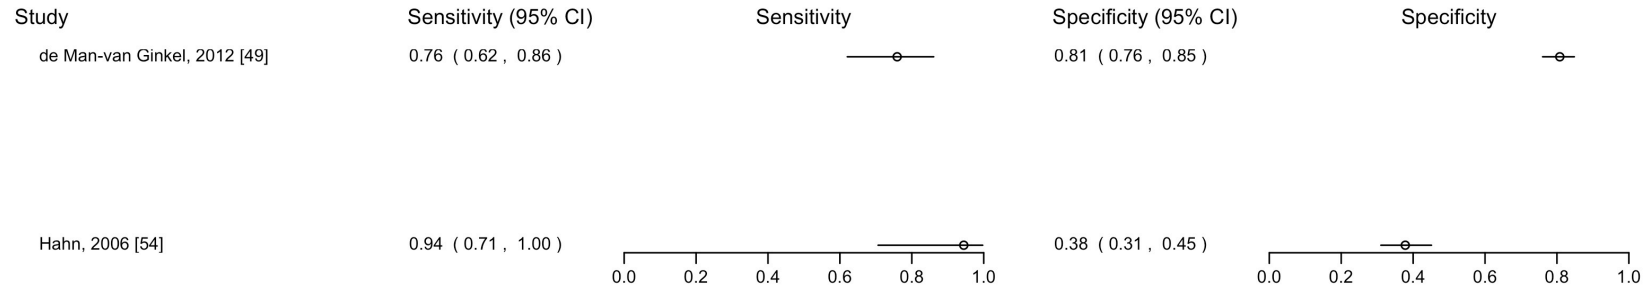

**eFigure 2y. Forest plots of sensitivity and specificity estimates for cutoff 2 of the PHQ-2 among participants from an outpatient specialty care setting, among studies that used a fully structured diagnostic interview as the reference standard (N Studies = 7; N Participants = 3,621; N major depression = 486)**

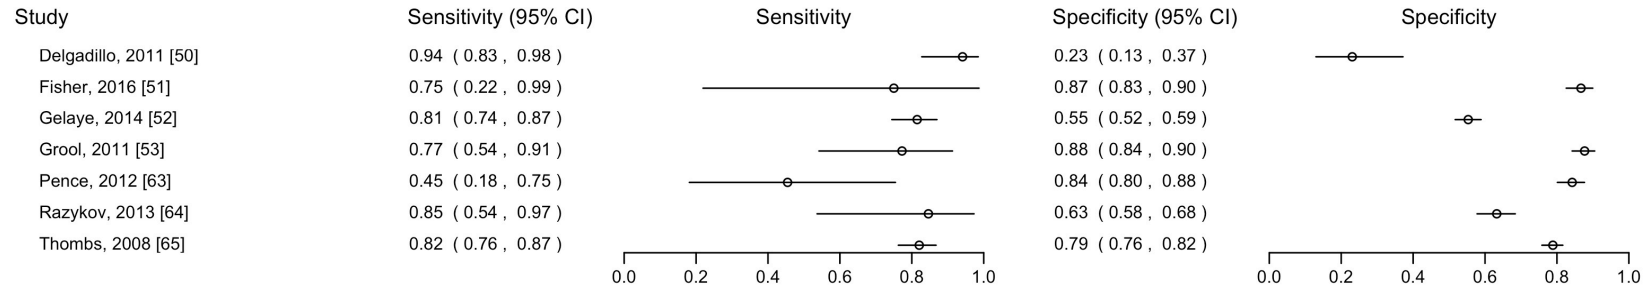



**eFigure 2z. Forest plots of sensitivity and specificity estimates for cutoff 2 of the PHQ-2, among studies that used the MINI as the reference standard (N Studies = 32; N Participants = 15,296; N major depression = 1,669)**

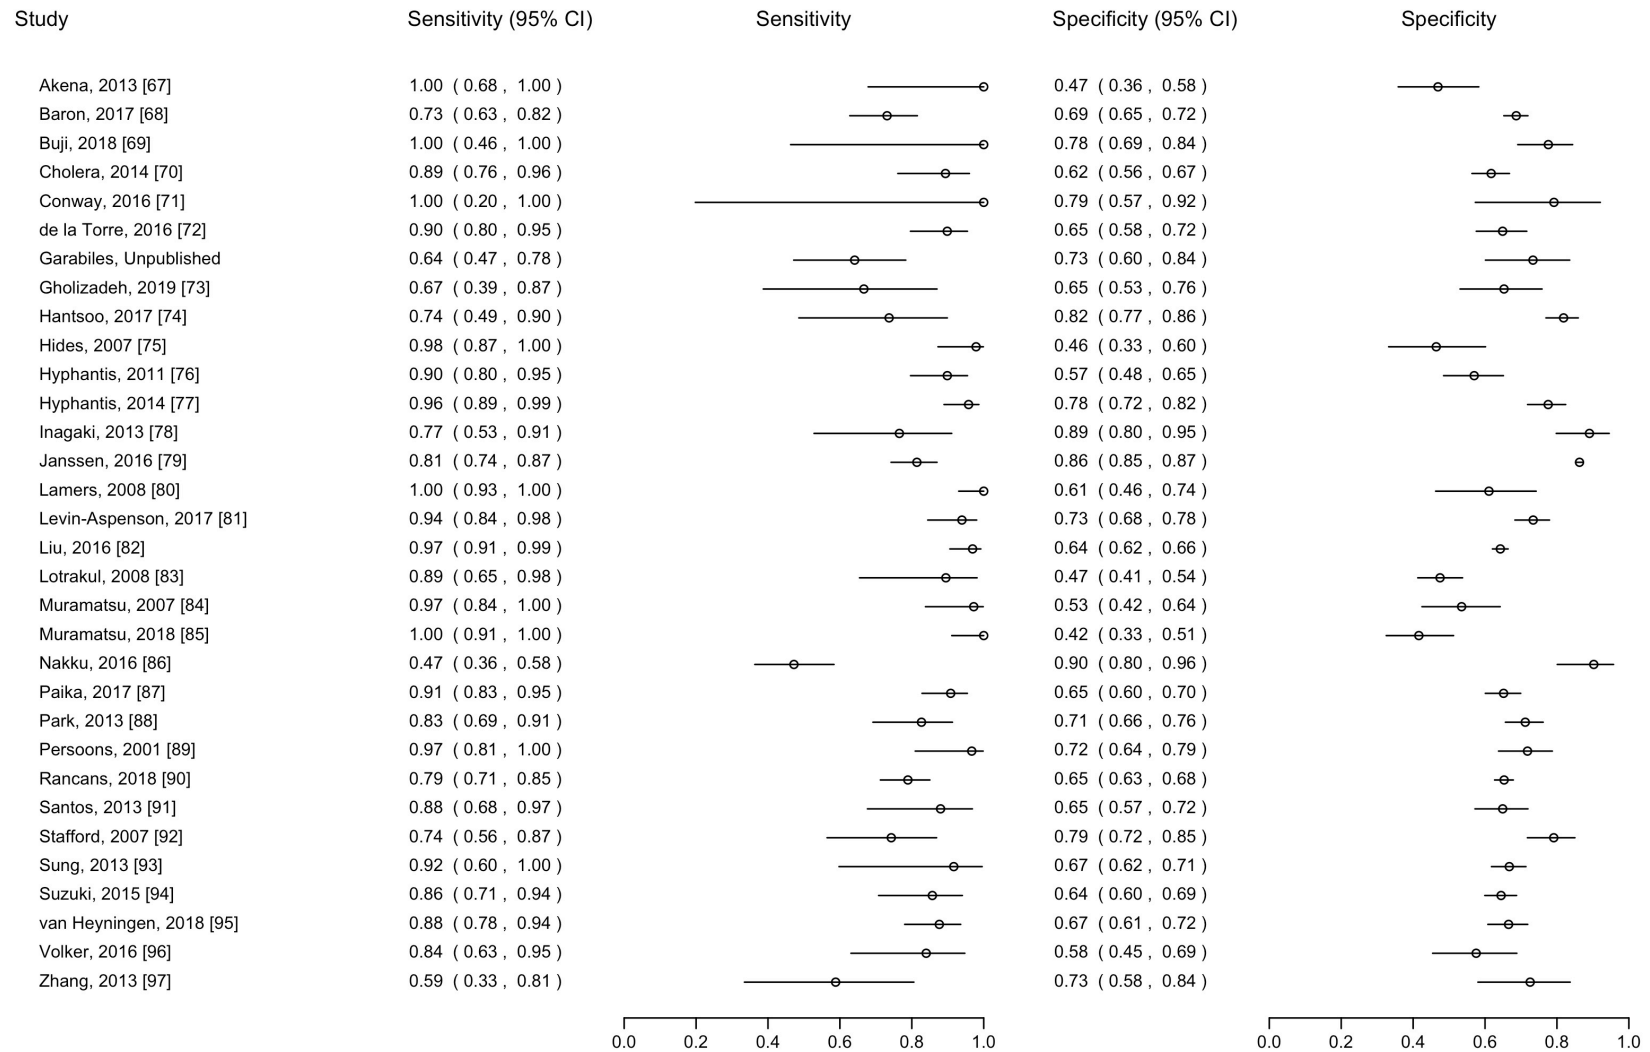

**eFigure 2aa. Forest plots of sensitivity and specificity estimates for cutoff 2 of the PHQ-2 among participants verified to not currently be diagnosed or receiving treatment for a mental health problem, among studies that used the MINI as the reference standard (N Studies = 15; N Participants = 8,390; N major depression = 581)**

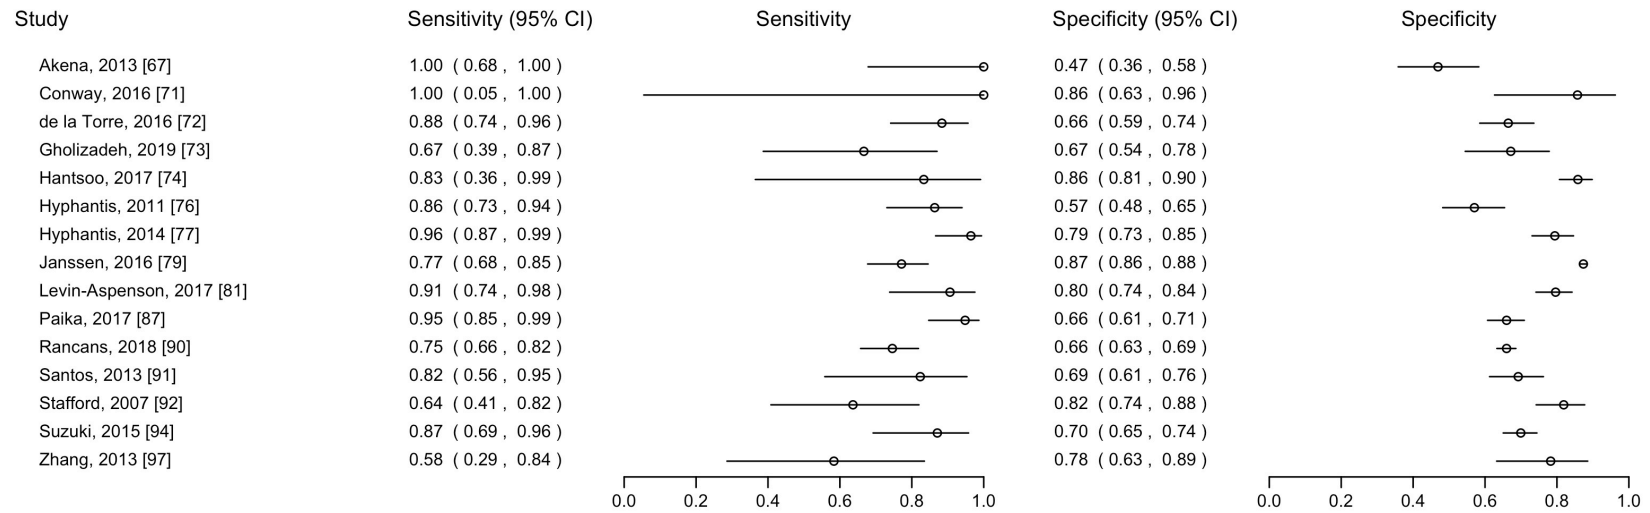

**eFigure 2ab. Forest plots of sensitivity and specificity estimates for cutoff 2 of the PHQ-2 among participants aged < 60, among studies that used the MINI as the reference standard (N Studies = 31; N Participants = 10,071; N major depression = 1,153)**

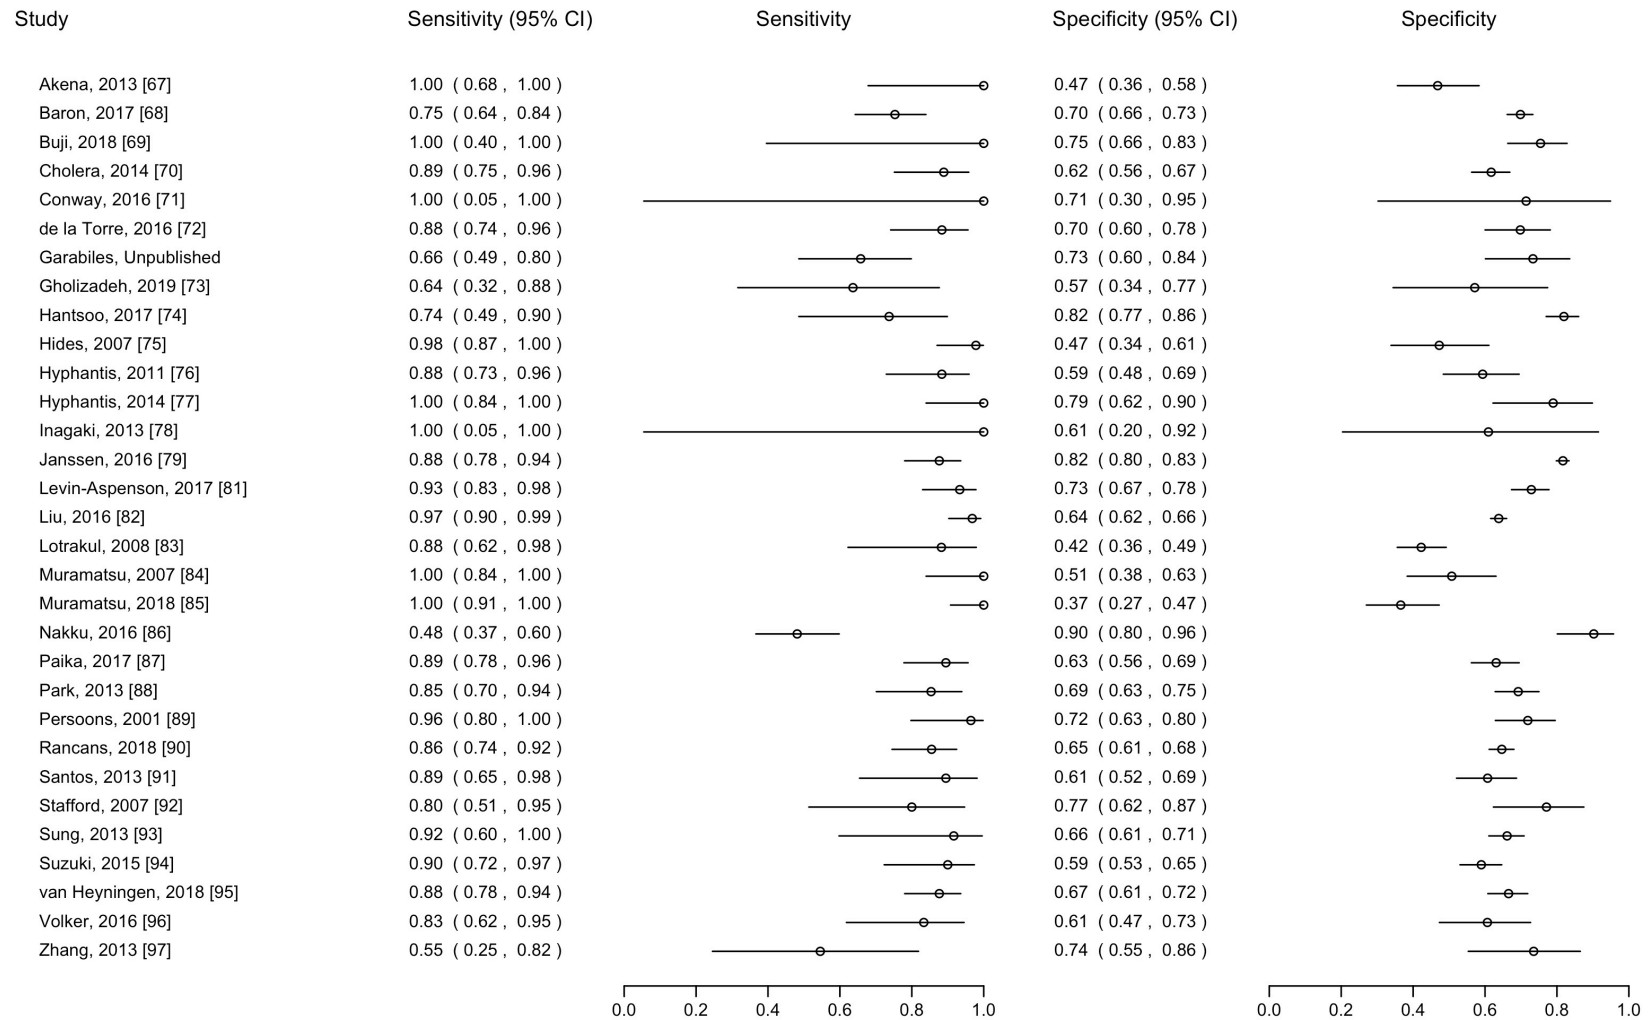

**eFigure 2ac. Forest plots of sensitivity and specificity estimates for cutoff 2 of the PHQ-2 among participants aged  $\geq 60$ , among studies that used the MINI as the reference standard (N Studies = 26; N Participants = 5,192; N major depression = 506)**

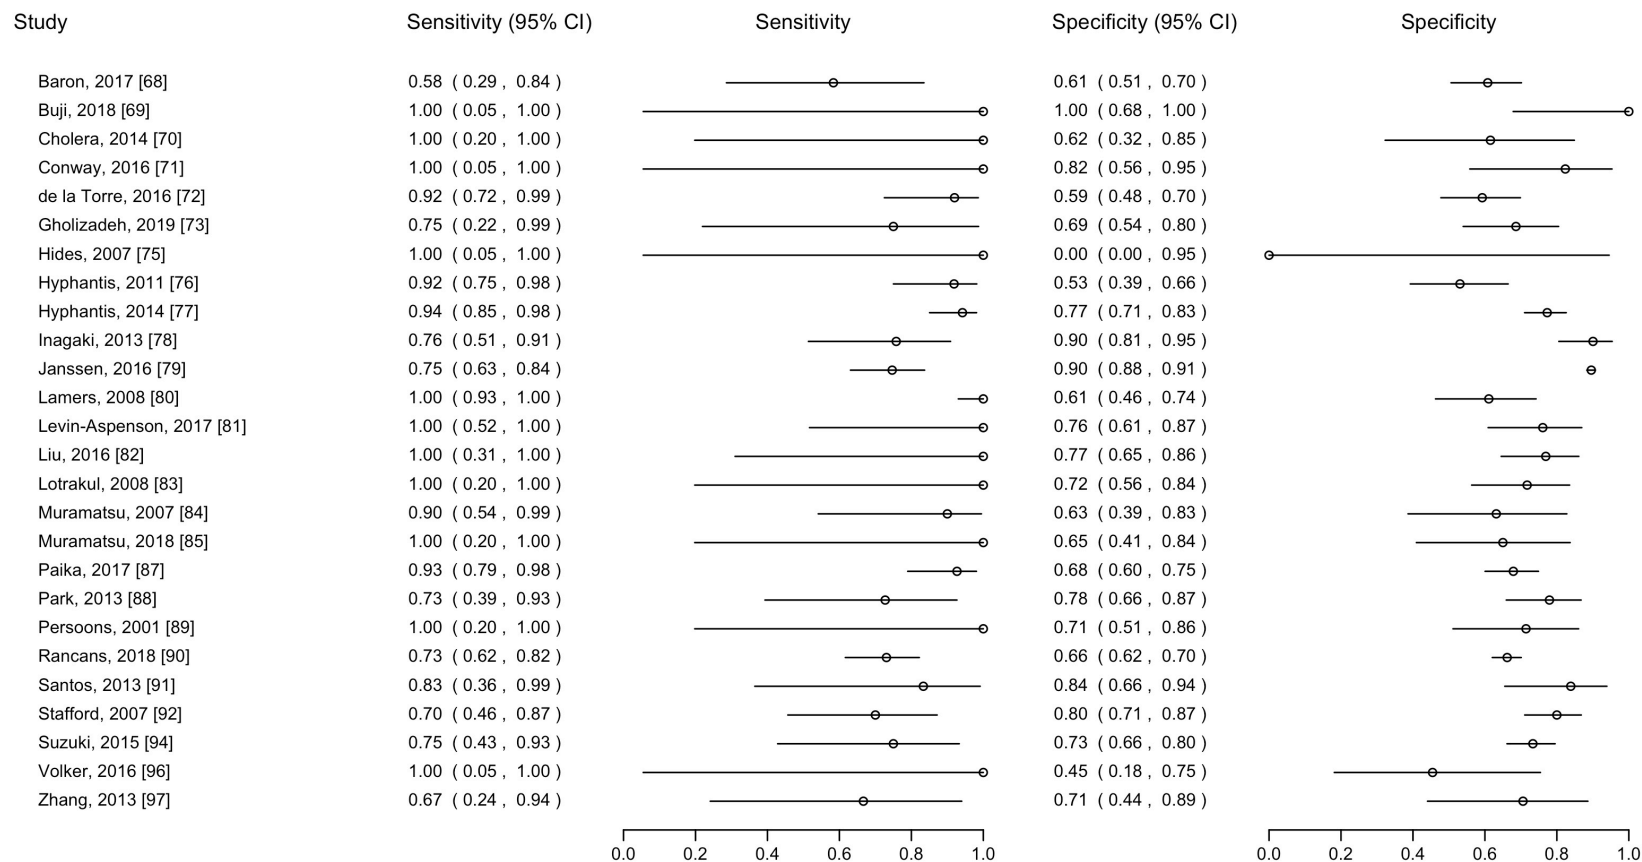

**eFigure 2ad. Forest plots of sensitivity and specificity estimates for cutoff 2 of the PHQ-2 among women, among studies that used the MINI as the reference standard (N Studies = 31; N Participants = 9,053; N major depression = 1,138)**

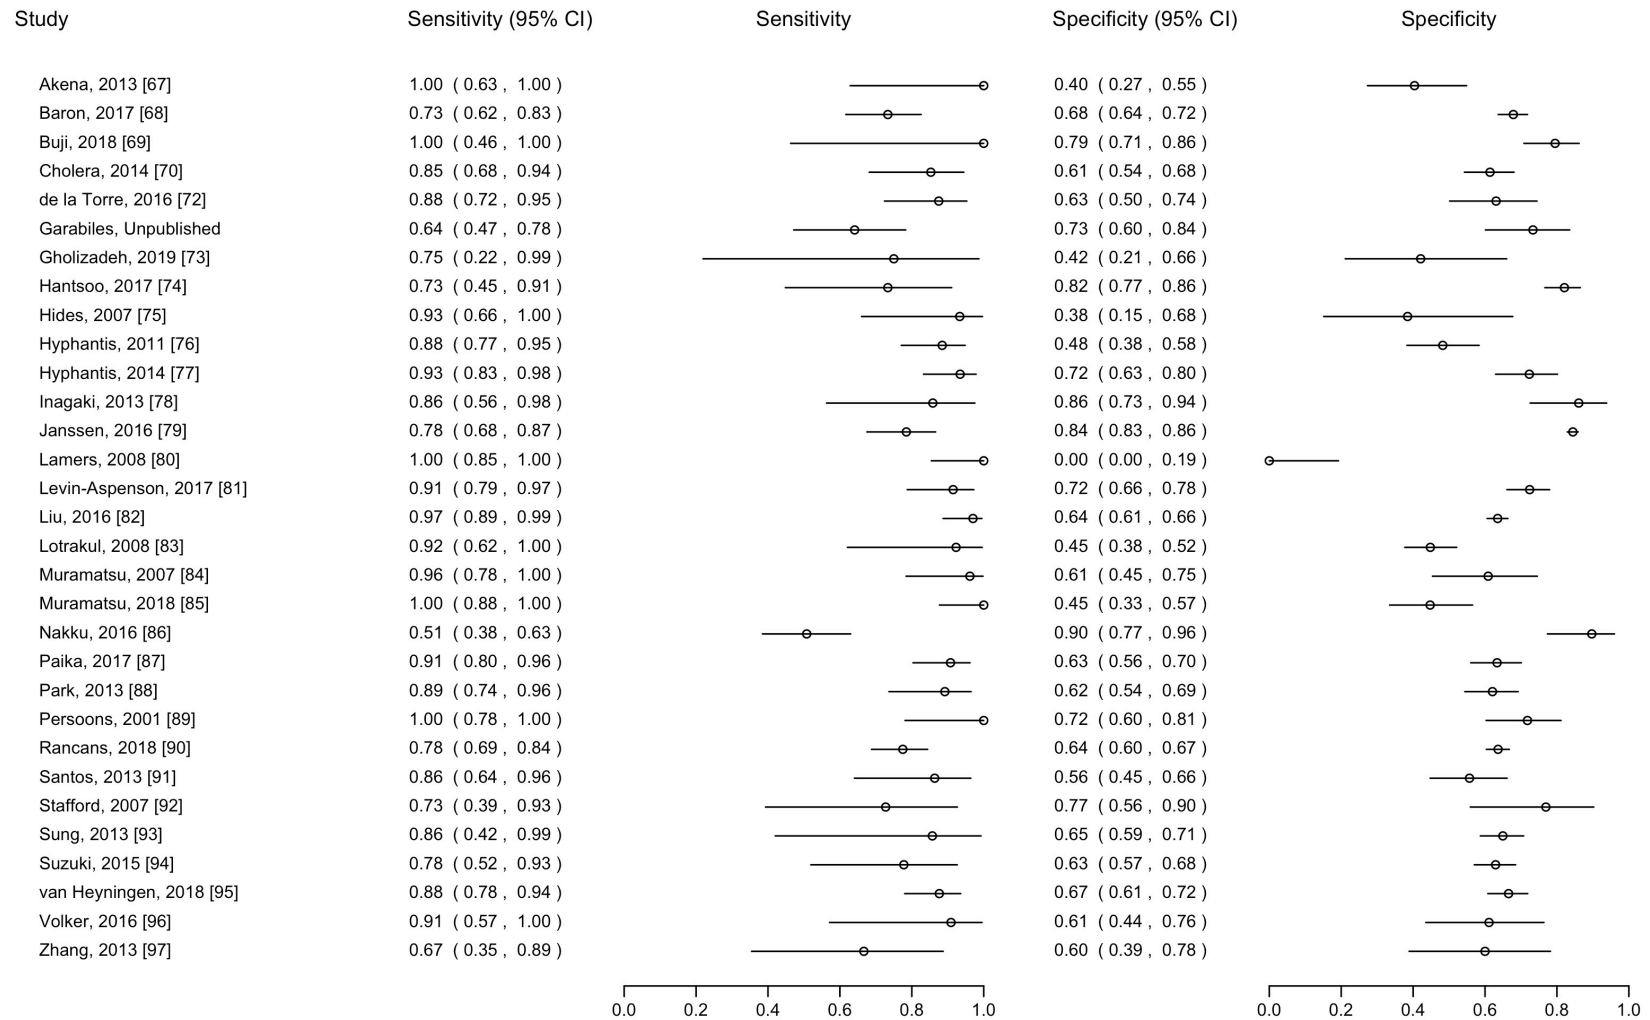

**eFigure 2ae. Forest plots of sensitivity and specificity estimates for cutoff 2 of the PHQ-2 among men, among studies that used the MINI as the reference standard (N Studies = 29; N Participants = 6,225; N major depression = 530)**

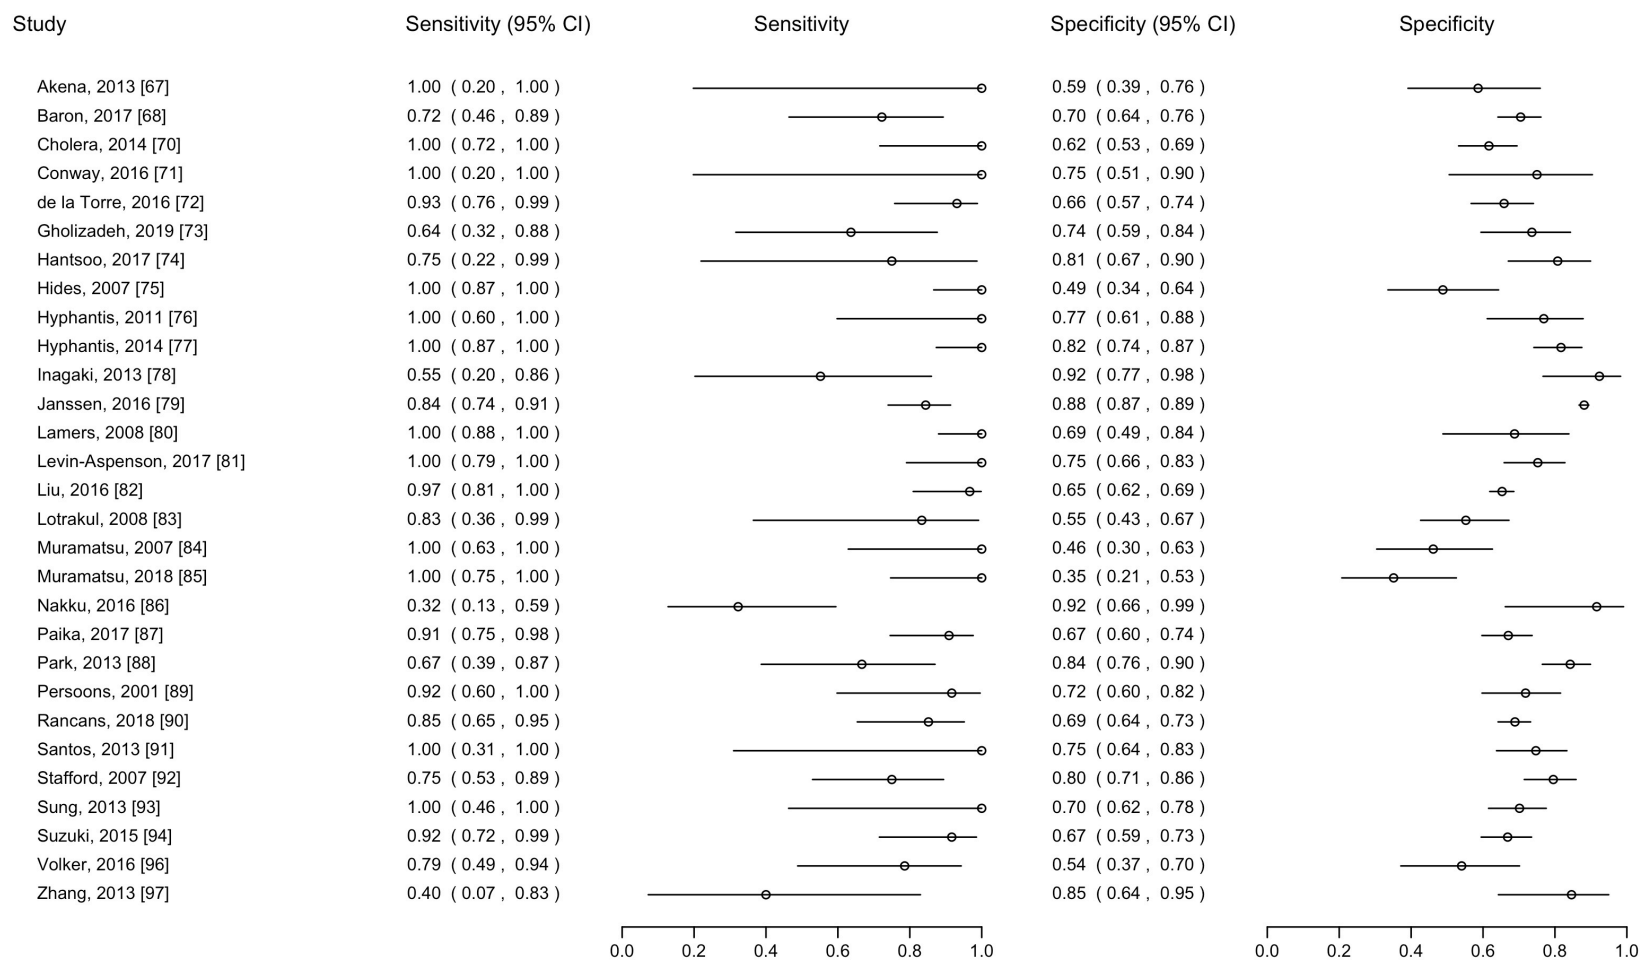

**eFigure 2af. Forest plots of sensitivity and specificity estimates for cutoff 2 of the PHQ-2 among participants from a country with a very high human development index, among studies that used the MINI as the reference standard (N Studies = 21; N Participants = 10,699; N major depression = 1,141)**

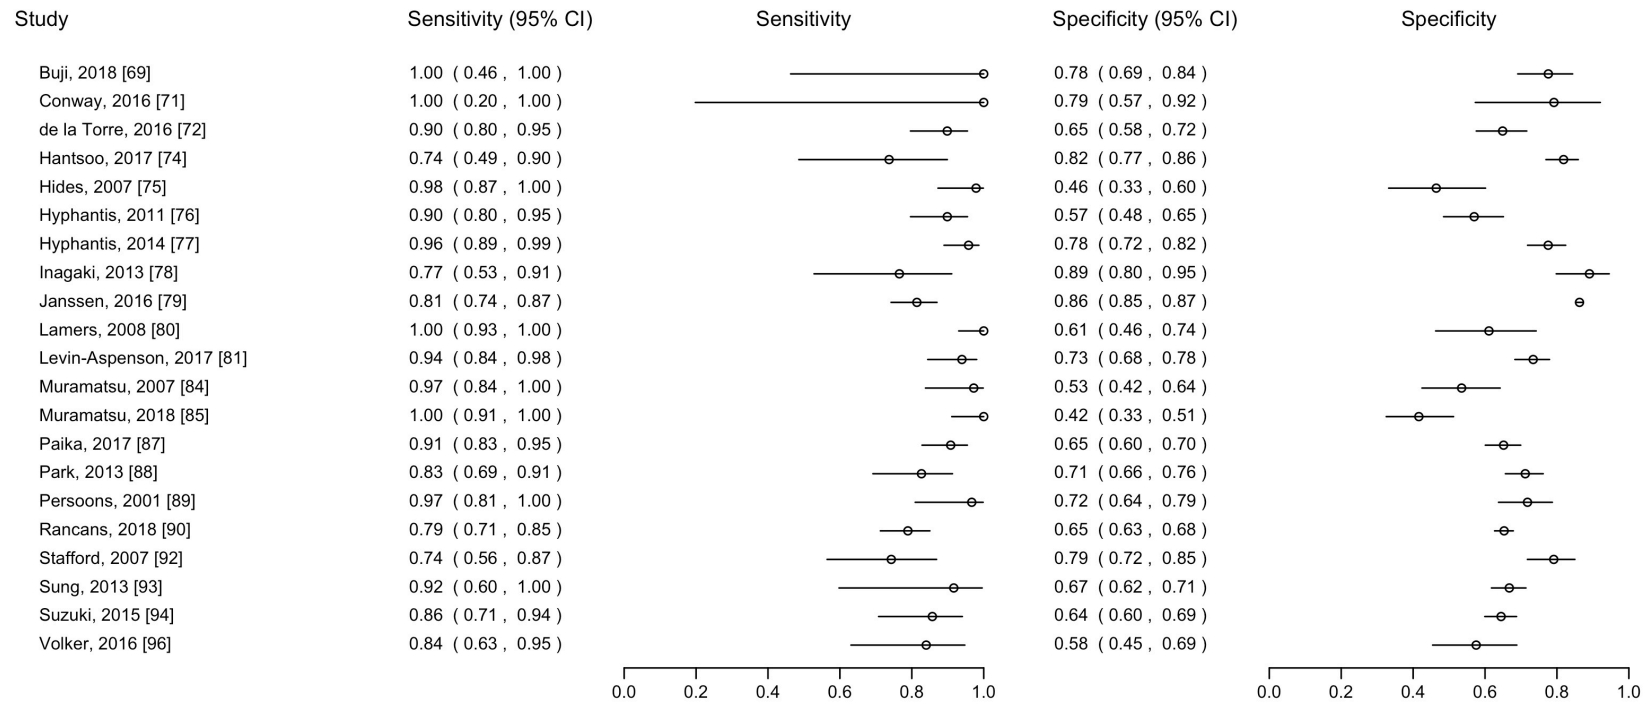

**eFigure 2ag. Forest plots of sensitivity and specificity estimates for cutoff 2 of the PHQ-2 among participants from a country with a high human development index, among studies that used the MINI as the reference standard (N Studies = 9; N Participants = 4,352; N major depression = 433)**

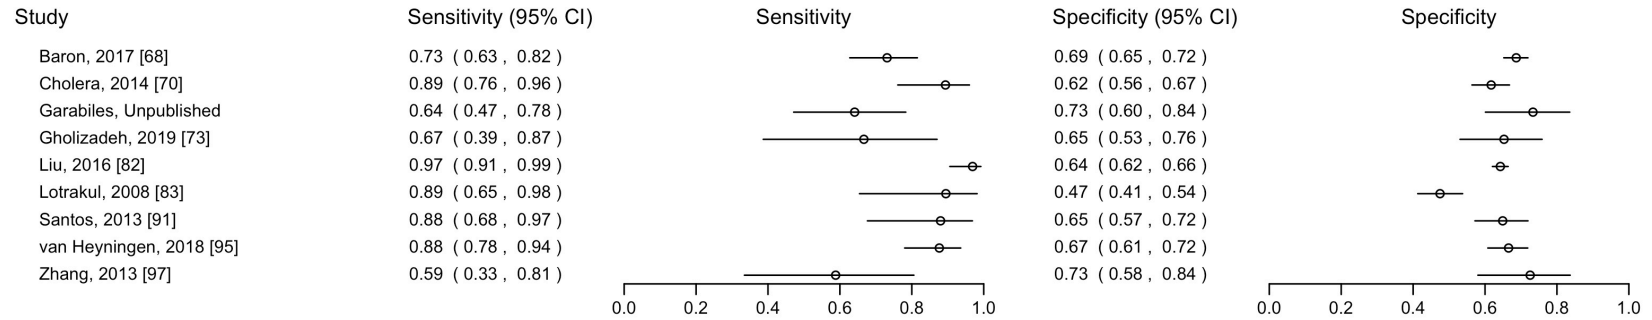



**eFigure 2ah. Forest plots of sensitivity and specificity estimates for cutoff 2 of the PHQ-2 among participants from a country with a low-medium human development index, among studies that used the MINI as the reference standard (N Studies = 2; N Participants = 245; N major depression = 95)**

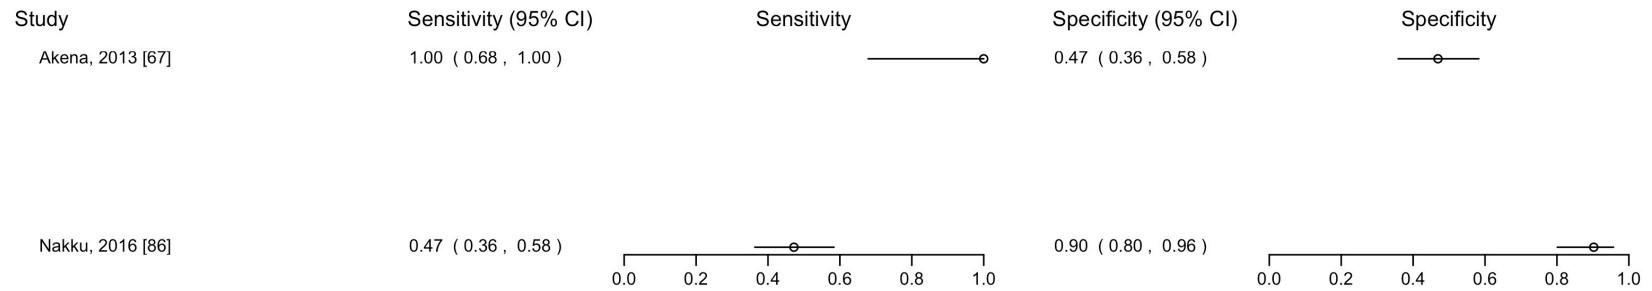

**eFigure 2ai. Forest plots of sensitivity and specificity estimates for cutoff 2 of the PHQ-2 among participants from a non-medical setting, among studies that used the MINI as the reference standard (N Studies = 8; N Participants = 6,792; N major depression = 470)**

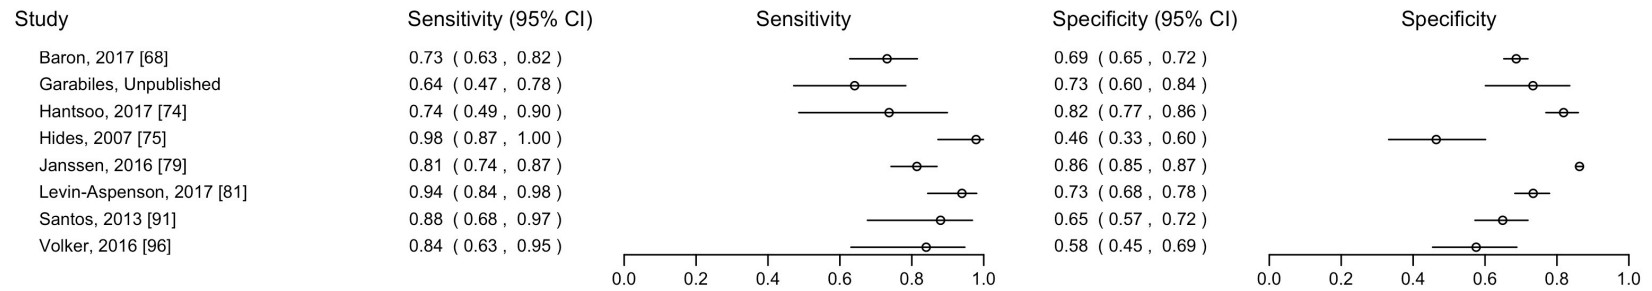

**eFigure 2aj. Forest plots of sensitivity and specificity estimates for cutoff 2 of the PHQ-2 among participants from a primary care setting, among studies that used the MINI as the reference standard (N Studies = 9; N Participants = 5,092; N major depression = 557)**

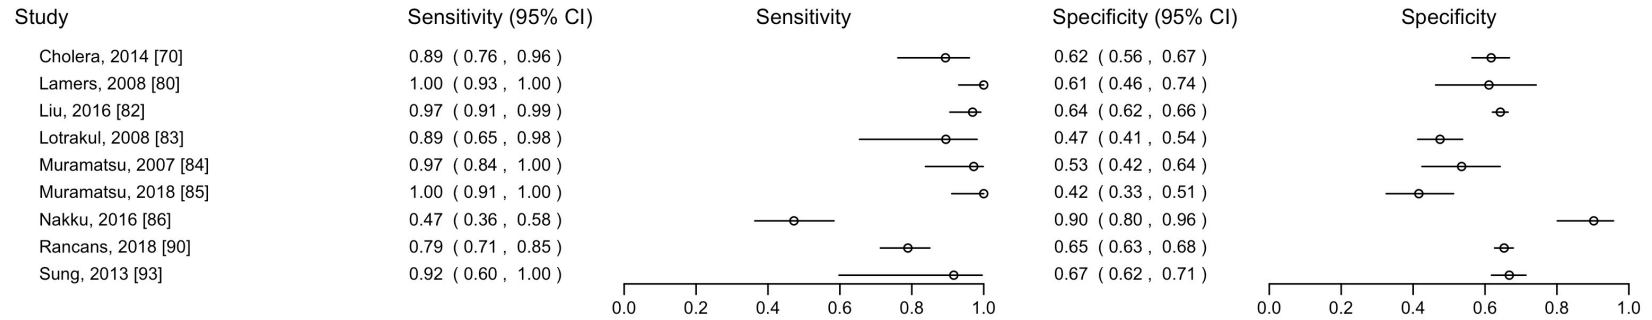

**eFigure 2ak. Forest plots of sensitivity and specificity estimates for cutoff 2 of the PHQ-2 among participants from an inpatient specialty care setting, among studies that used the MINI as the reference standard (N Studies = 4; N Participants = 619; N major depression = 135)**

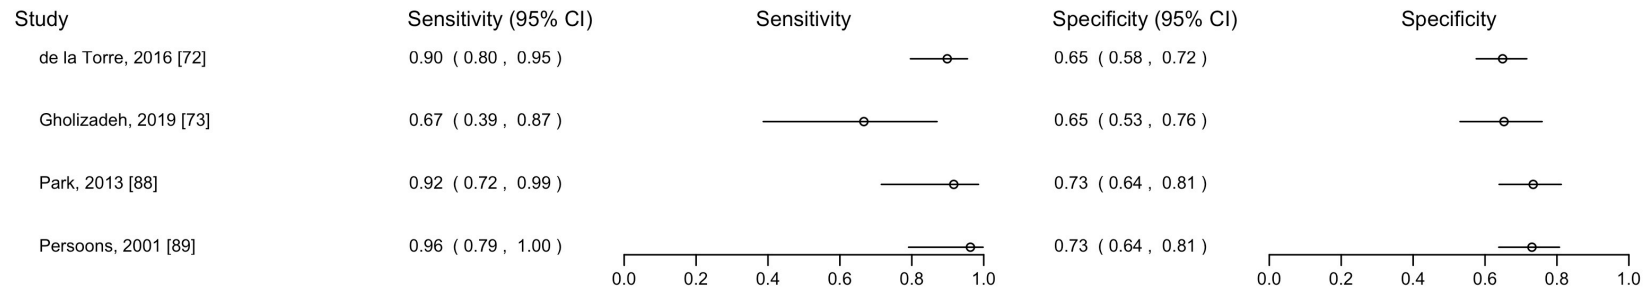

**eFigure 2a. Forest plots of sensitivity and specificity estimates for cutoff 2 of the PHQ-2 among participants from an outpatient specialty care setting, among studies that used the MINI as the reference standard (N Studies = 12; N Participants = 2,663; N major depression = 502)**

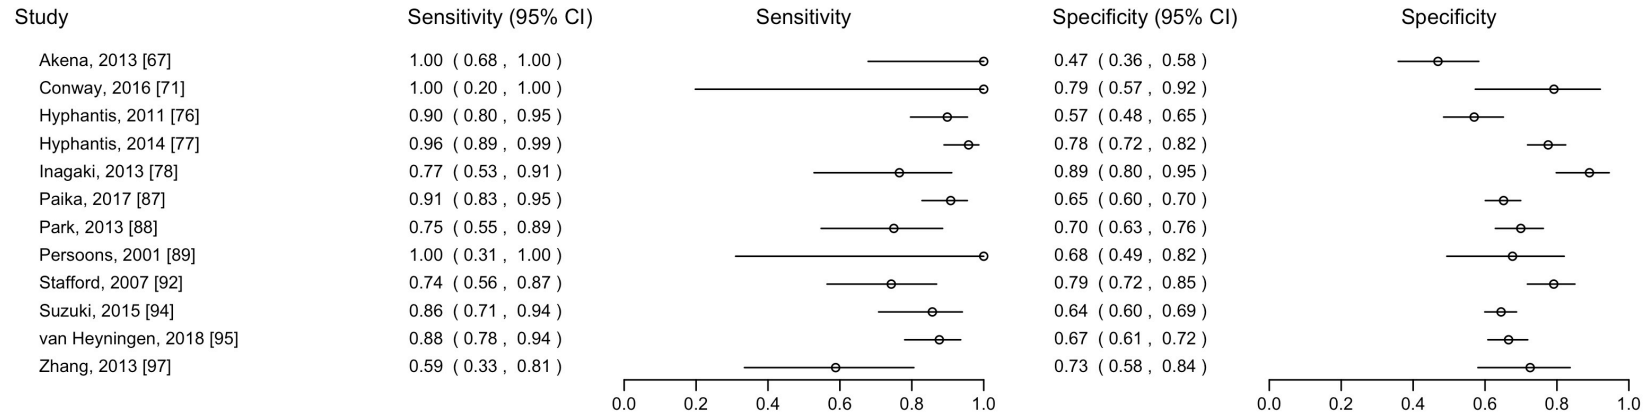

**eFigure 2am. Forest plots of sensitivity and specificity estimates for cutoff 3 of the PHQ-2, among studies that used a semi-structured diagnostic interview as the reference standard (N Studies = 48; N Participants = 11,703; N major depression = 1,538)**

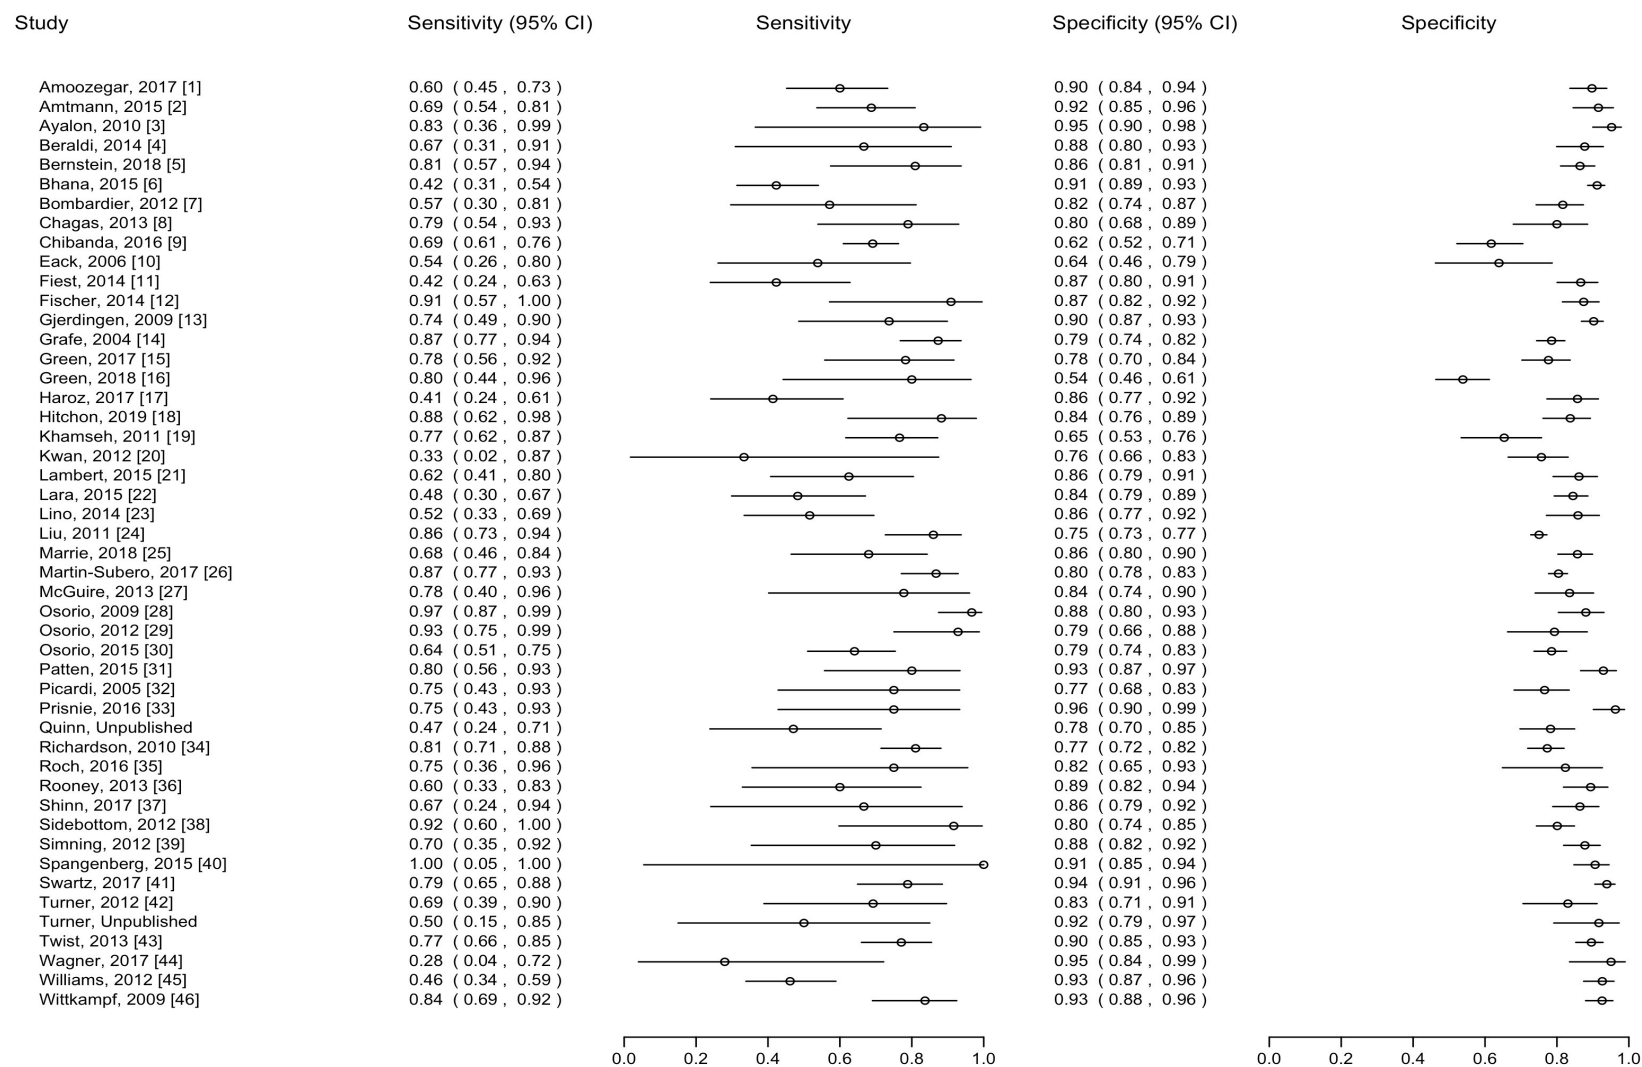

**eFigure 2an. Forest plots of sensitivity and specificity estimates for cutoff 3 of the PHQ-2 among participants verified to not currently be diagnosed or receiving treatment for a mental health problem, among studies that used a semi-structured diagnostic interview as the reference standard (N Studies = 25; N Participants = 3,708; N major depression = 527)**

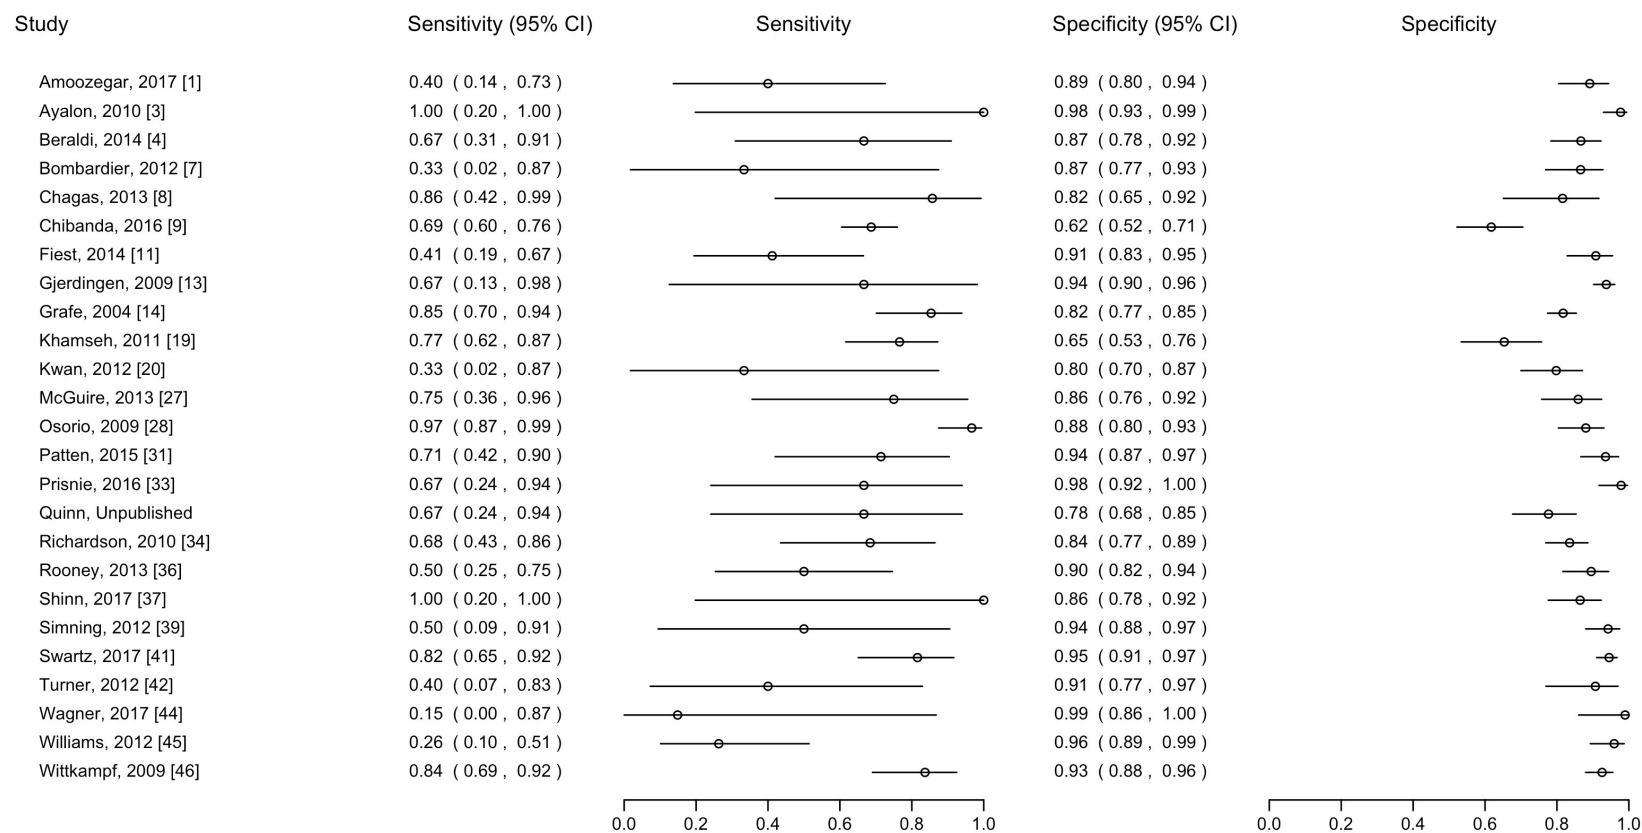

**eFigure 2ao. Forest plots of sensitivity and specificity estimates for cutoff 3 of the PHQ-2 among participants aged < 60, among studies that used a semi-structured diagnostic interview as the reference standard (N Studies = 43; N Participants = 7,759; N major depression = 1,117)**

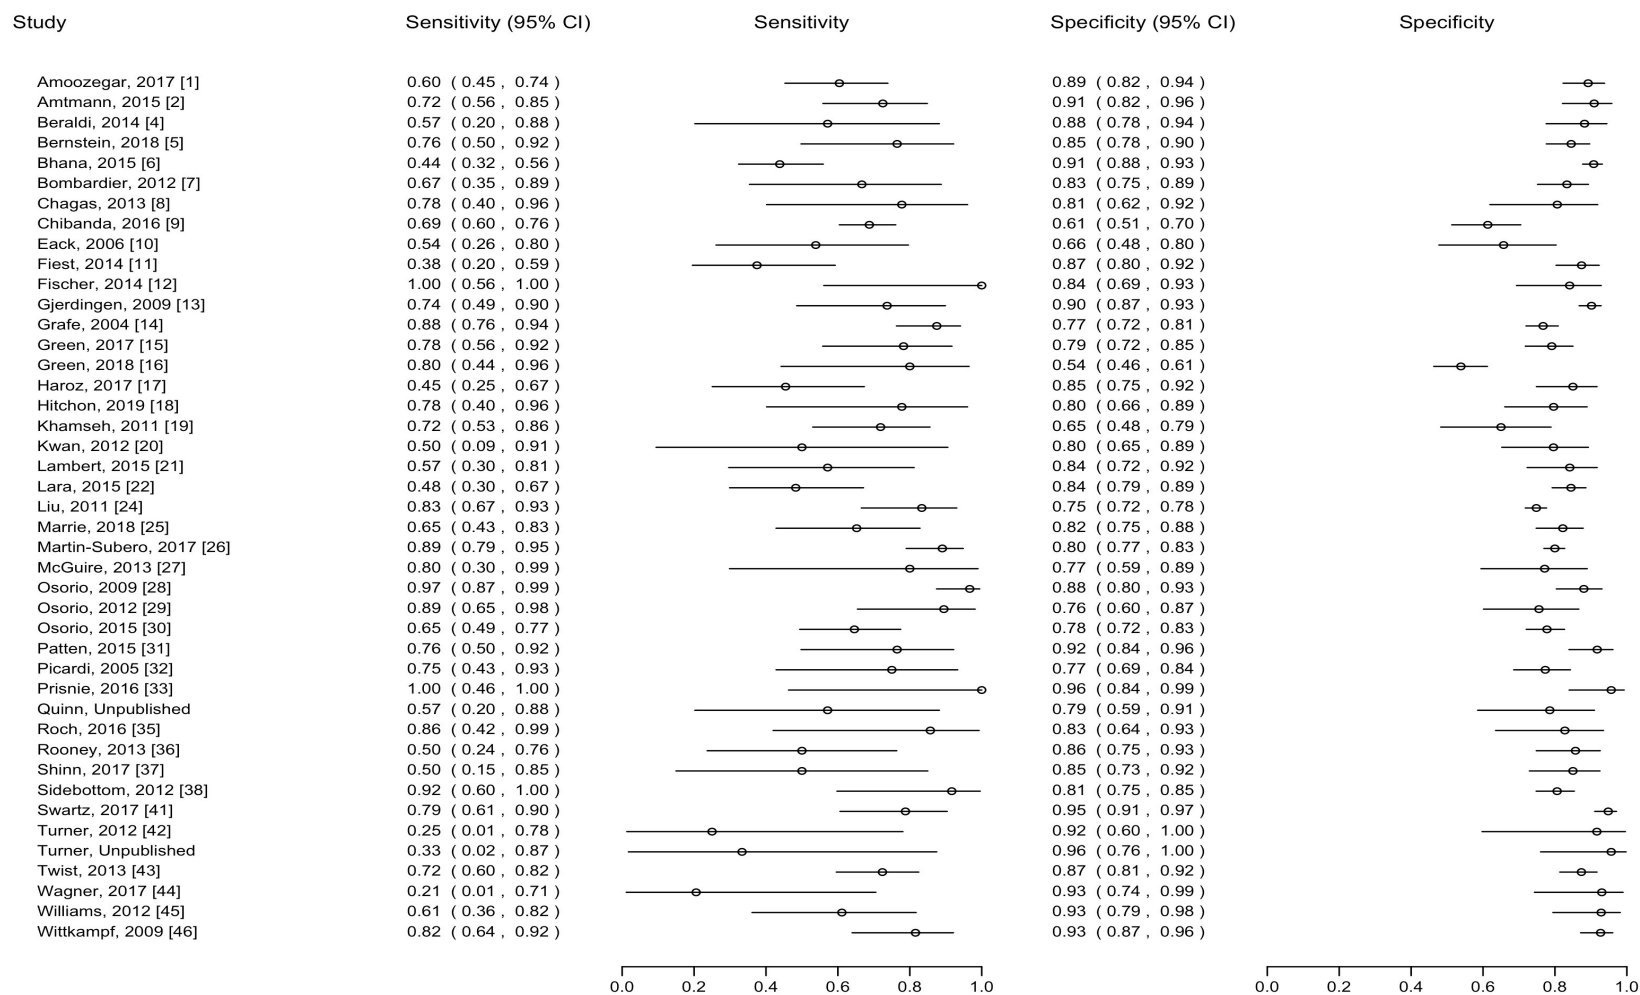



**eFigure 2ap. Forest plots of sensitivity and specificity estimates for cutoff 3 of the PHQ-2 among participants aged  $\geq 60$ , among studies that used a semi-structured diagnostic interview as the reference standard (N Studies = 40; N Participants = 3,875; N major depression = 415)**

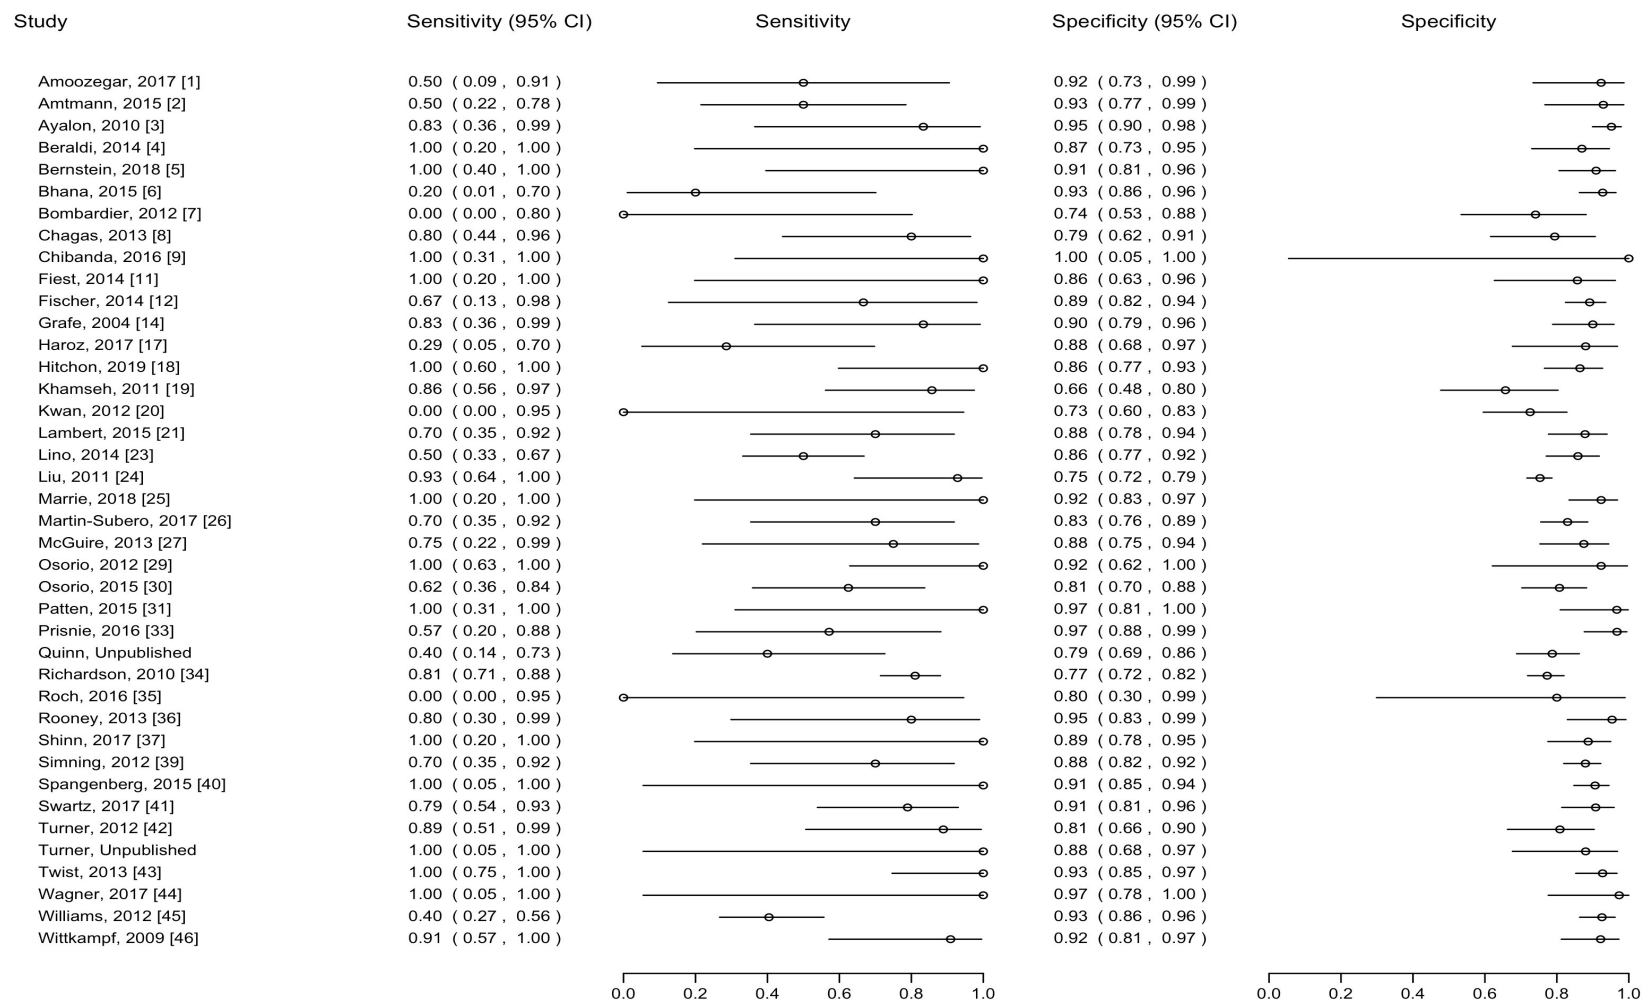

**eFigure 2aq. Forest plots of sensitivity and specificity estimates for cutoff 3 of the PHQ-2 among women, among studies that used a semi-structured diagnostic interview as the reference standard (N Studies = 47; N Participants = 7,280; N major depression = 1,054)**

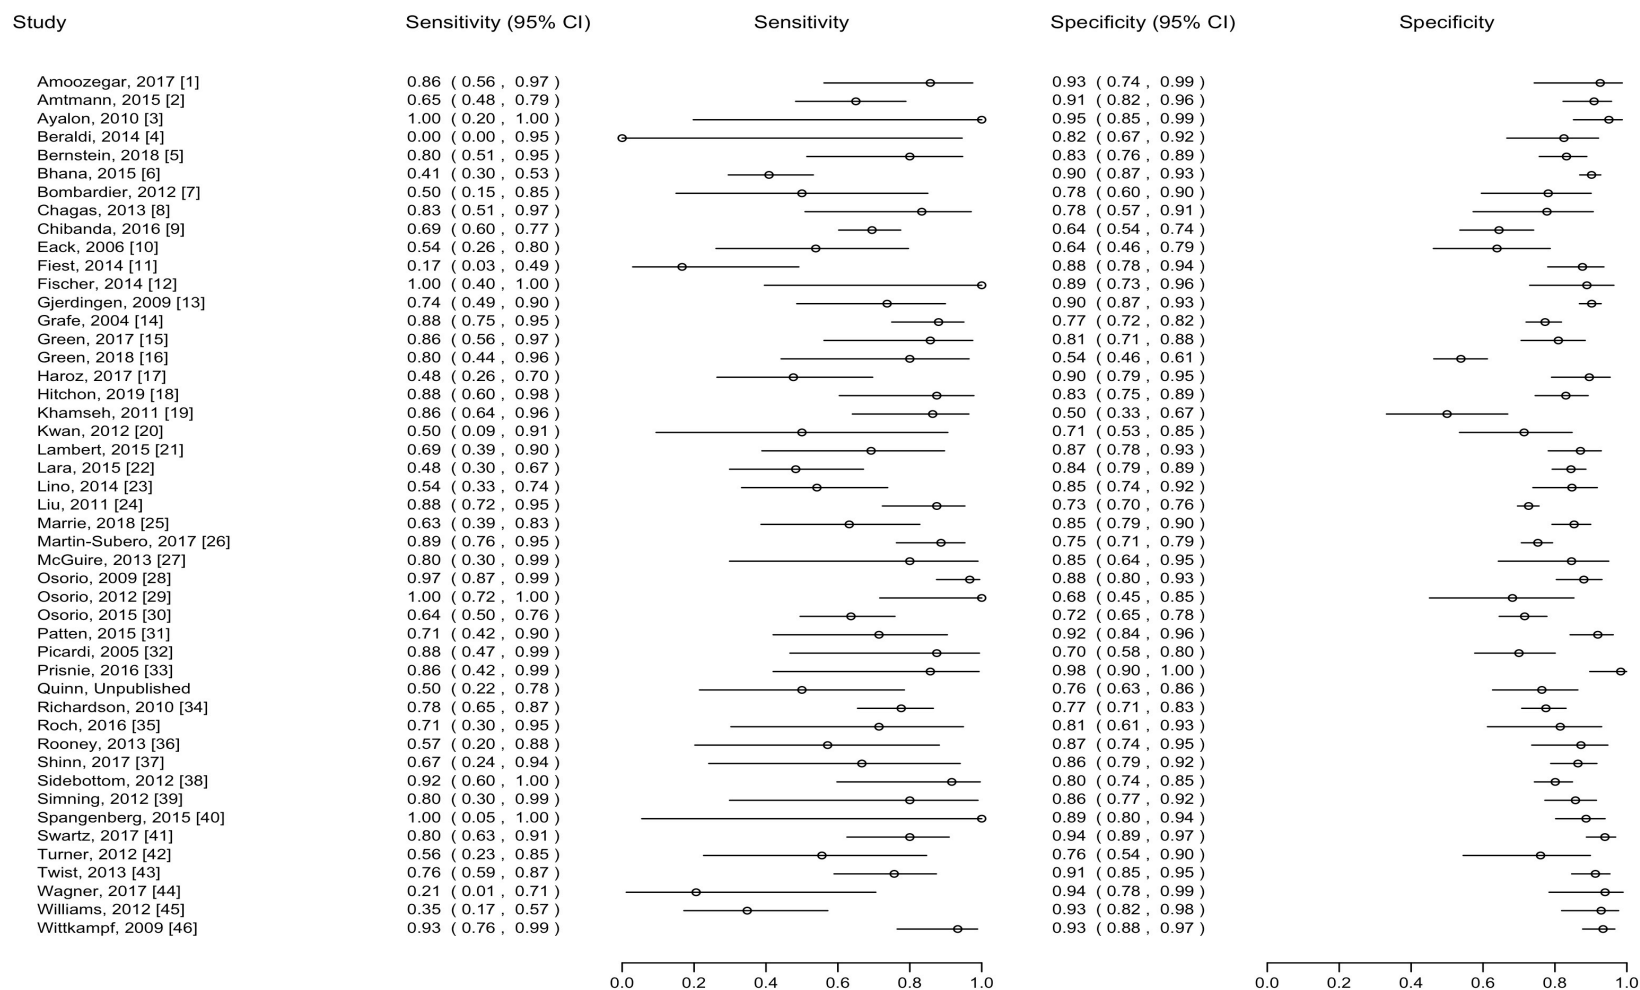

**eFigure 2ar. Forest plots of sensitivity and specificity estimates for cutoff 3 of the PHQ-2 among men, among studies that used a semi-structured diagnostic interview as the reference standard (N Studies = 40; N Participants = 4,345; N major depression = 484)**

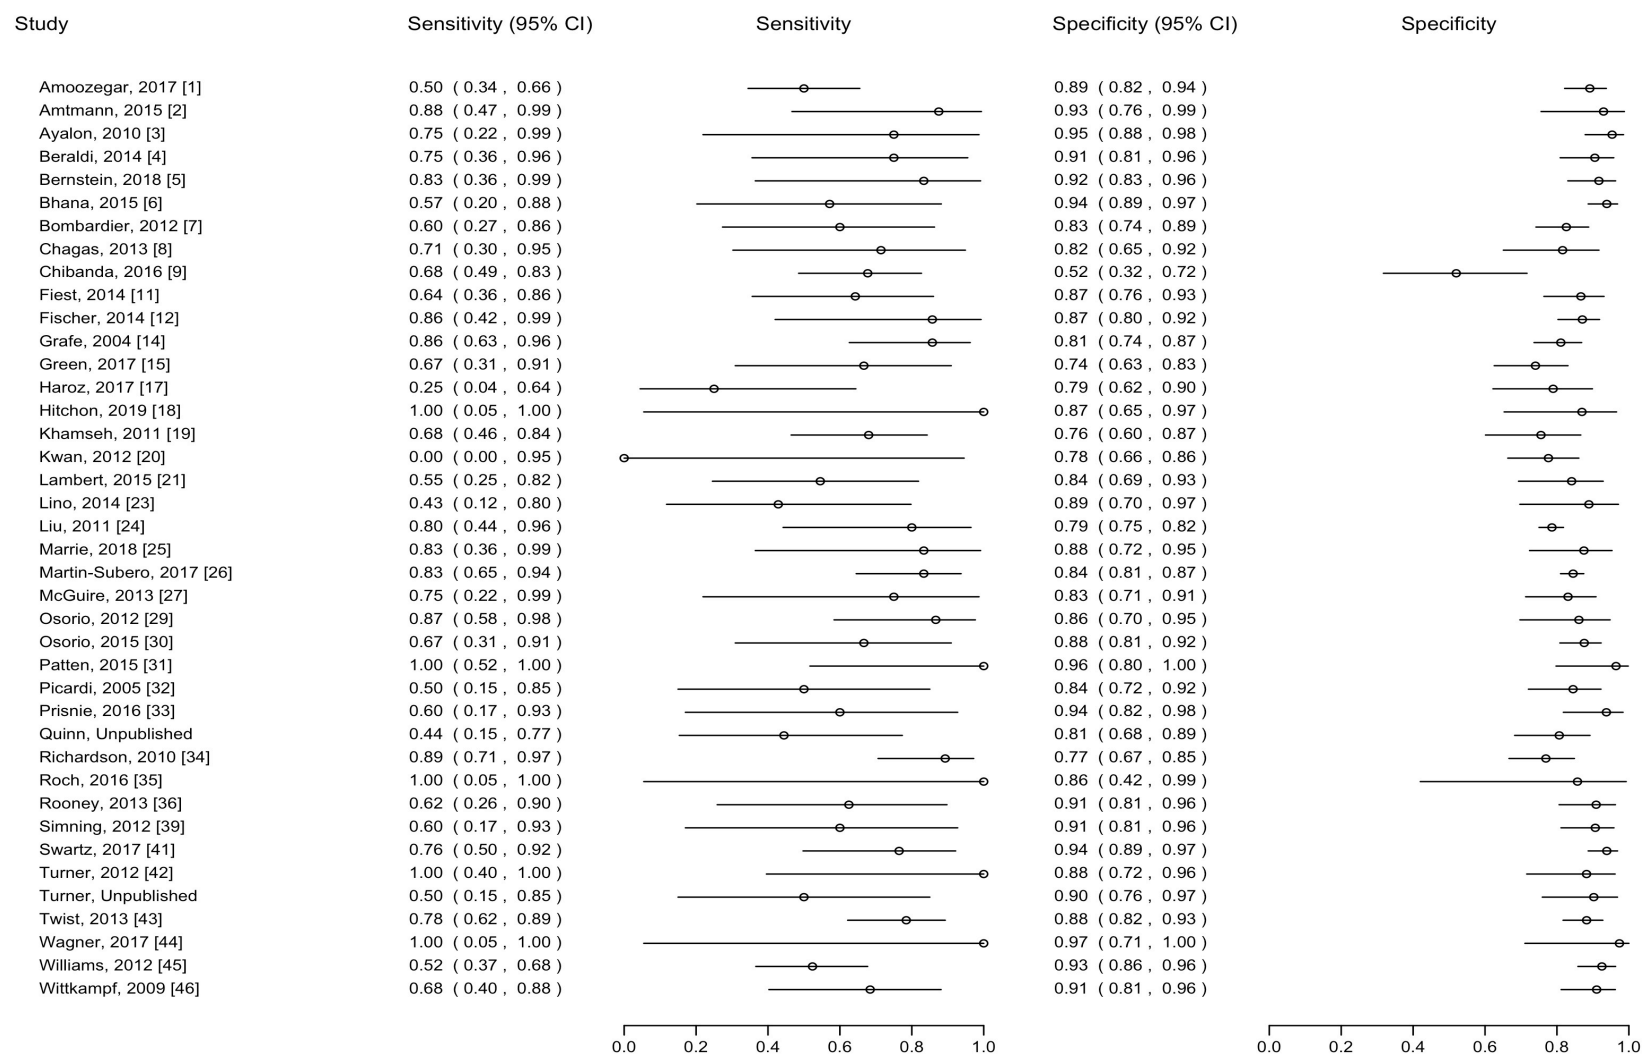

**eFigure 2as. Forest plots of sensitivity and specificity estimates for cutoff 3 of the PHQ-2 among participants from a country with a very high human development index, among studies that used a semi-structured diagnostic interview as the reference standard (N Studies = 37; N Participants = 9,156; N major depression = 994)**

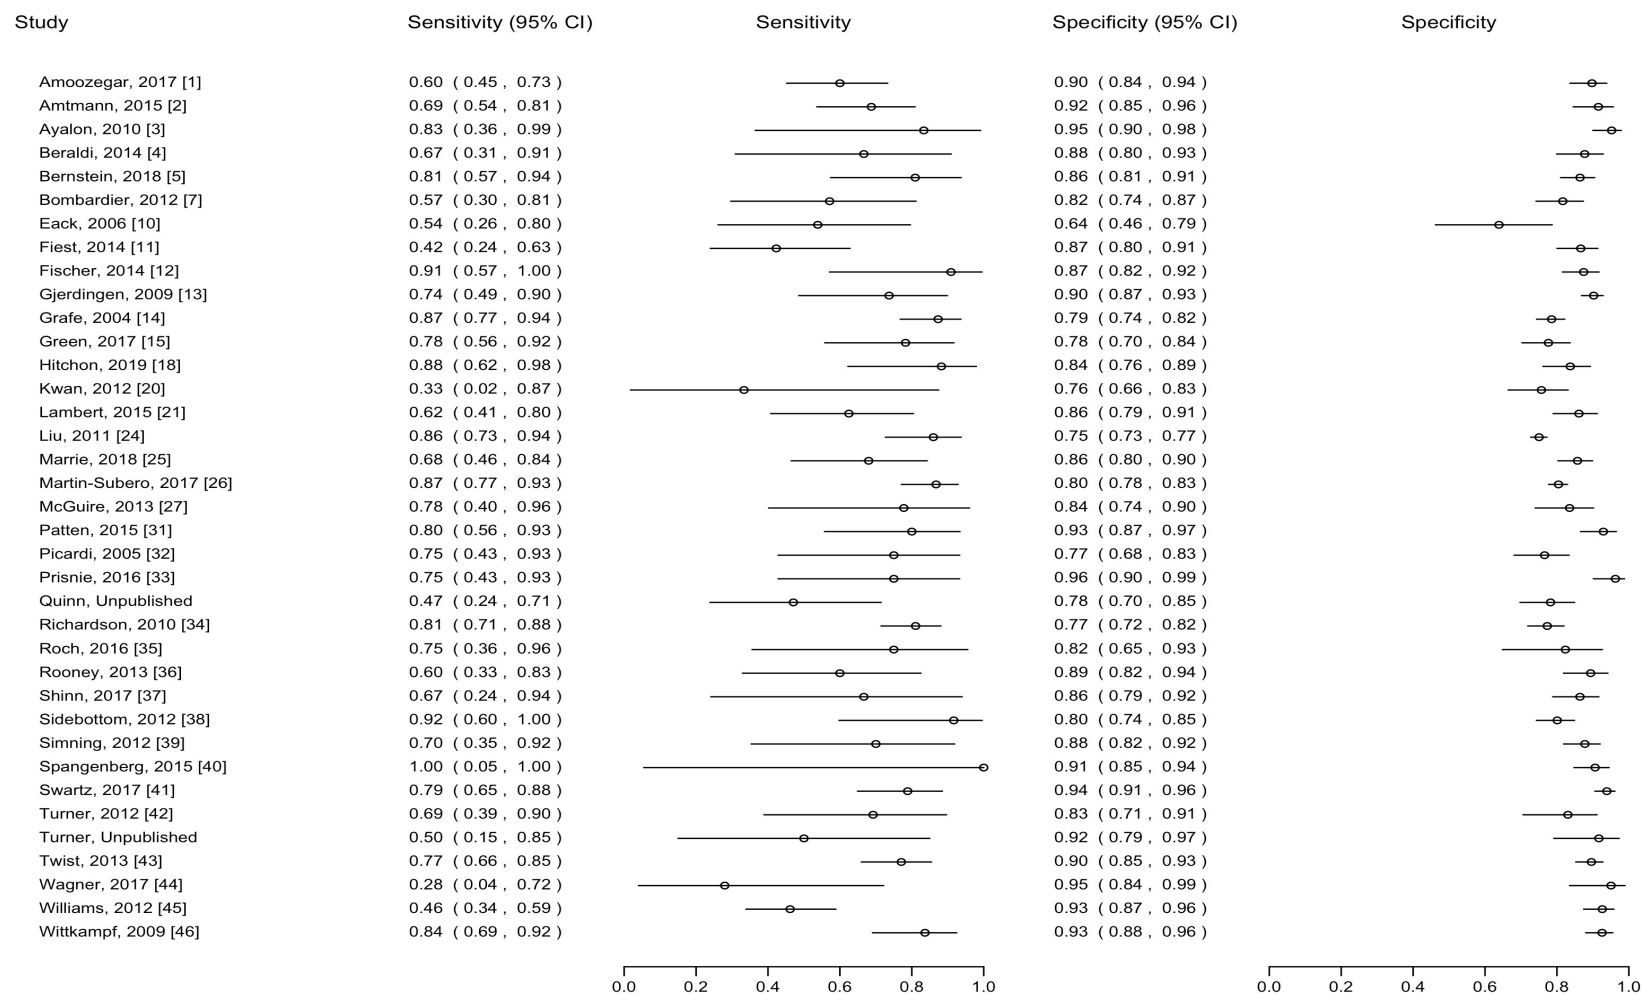

**eFigure 2at. Forest plots of sensitivity and specificity estimates for cutoff 3 of the PHQ-2 among participants from a country with a high human development index, among studies that used a semi-structured diagnostic interview as the reference standard (N Studies = 8; N Participants = 1,957; N major depression = 356)**

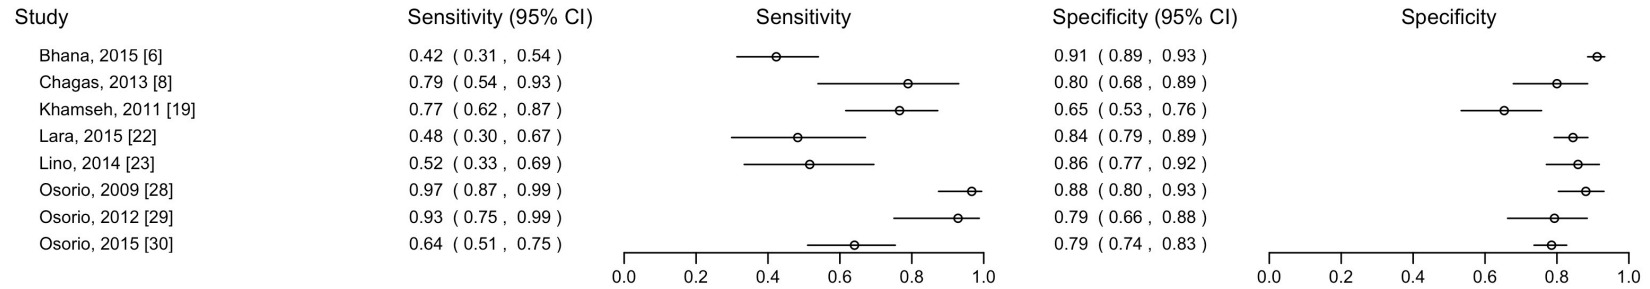

**eFigure 2au. Forest plots of sensitivity and specificity estimates for cutoff 3 of the PHQ-2 among participants from a country with a low-medium human development index, among studies that used a semi-structured diagnostic interview as the reference standard (N Studies = 3; N Participants = 590; N major depression = 188)**

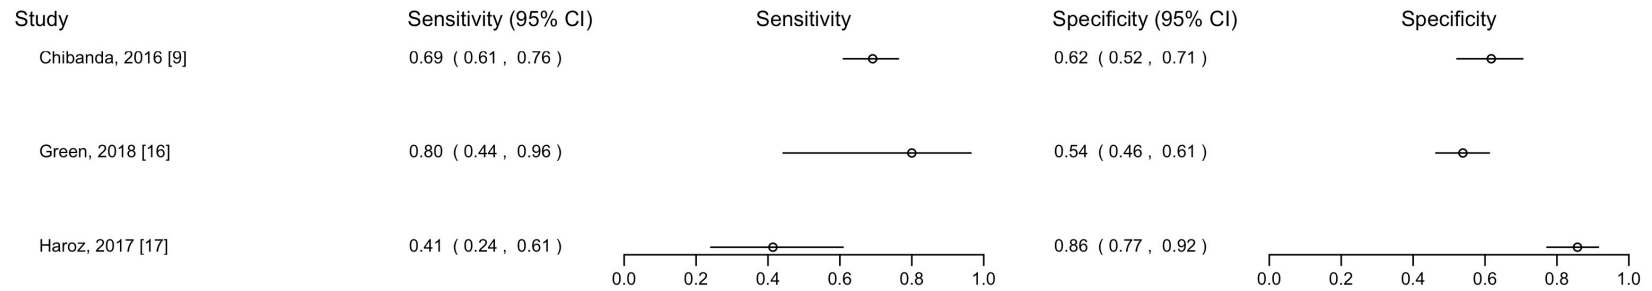

**eFigure 2av. Forest plots of sensitivity and specificity estimates for cutoff 3 of the PHQ-2 among participants from a non-medical setting, among studies that used a semi-structured diagnostic interview as the reference standard (N Studies = 2; N Participants = 567; N major depression = 105)**

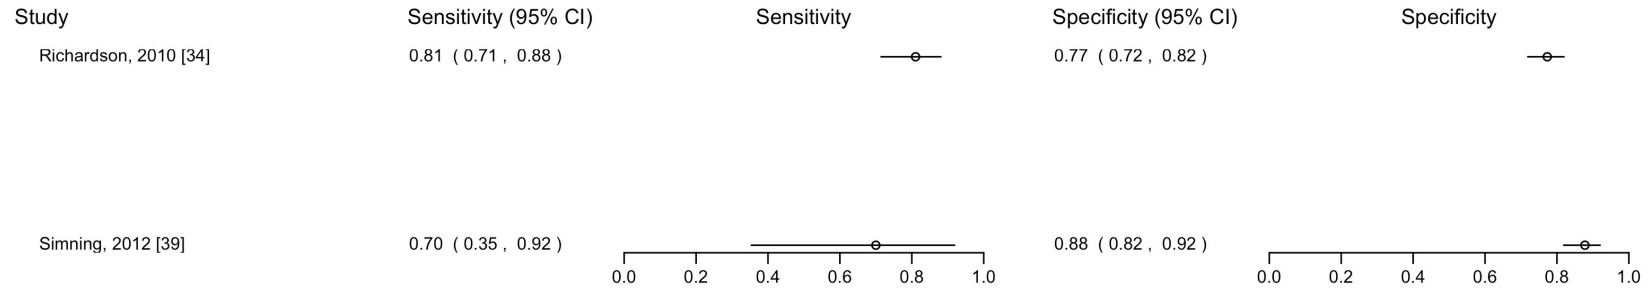

**eFigure 2aw. Forest plots of sensitivity and specificity estimates for cutoff 3 of the PHQ-2 among participants from a primary care setting, among studies that used a semi-structured diagnostic interview as the reference standard (N Studies = 15; N Participants = 4,569; N major depression = 667)**

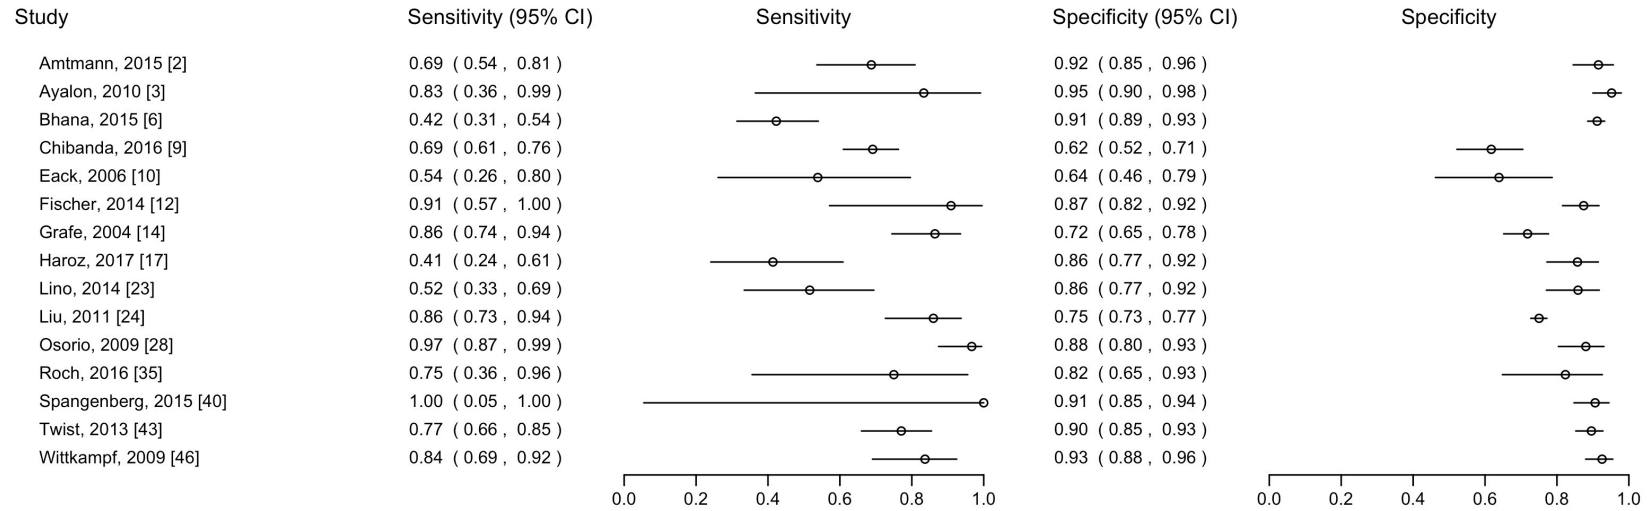



**eFigure 2ax. Forest plots of sensitivity and specificity estimates for cutoff 3 of the PHQ-2 among participants from an inpatient specialty care setting, among studies that used a semi-structured diagnostic interview as the reference standard (N Studies = 10; N Participants = 2,019; N major depression = 184)**

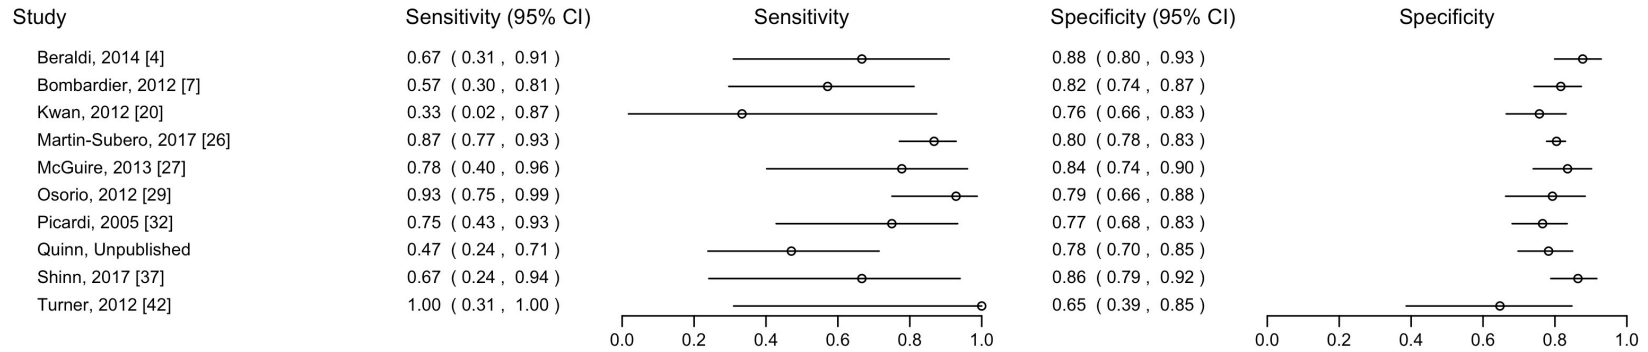

**eFigure 2ay. Forest plots of sensitivity and specificity estimates for cutoff 3 of the PHQ-2 among participants from an outpatient specialty care setting, among studies that used a semi-structured diagnostic interview as the reference standard (N Studies = 23; N Participants = 4,548; N major depression = 582)**

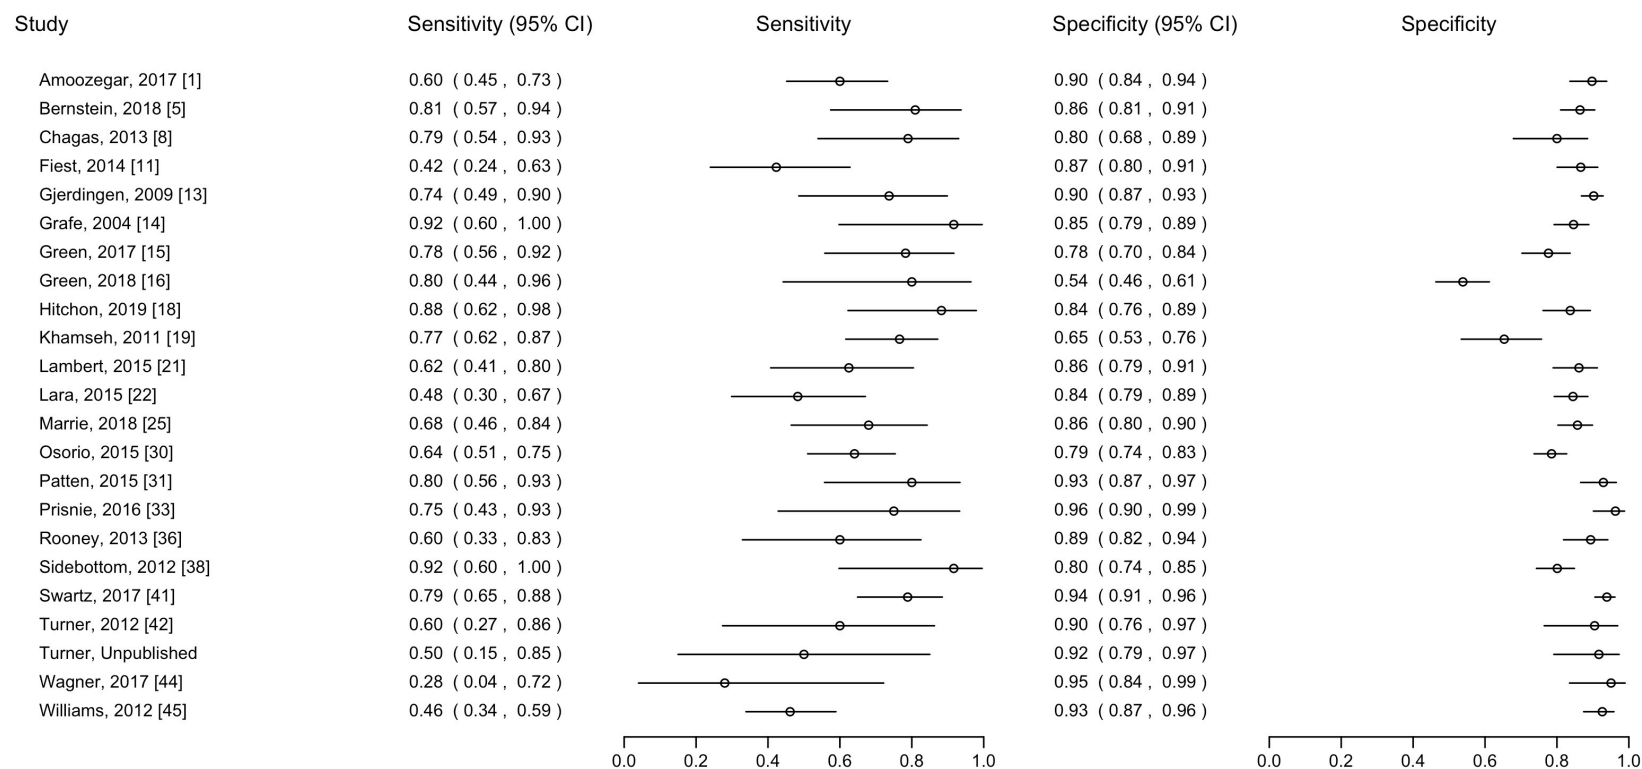

**eFigure 2az. Forest plots of sensitivity and specificity estimates for cutoff 3 of the PHQ-2, among studies that used a fully structured diagnostic interview as the reference standard (N Studies = 20; N Participants = 17,319; N major depression = 1,365)**

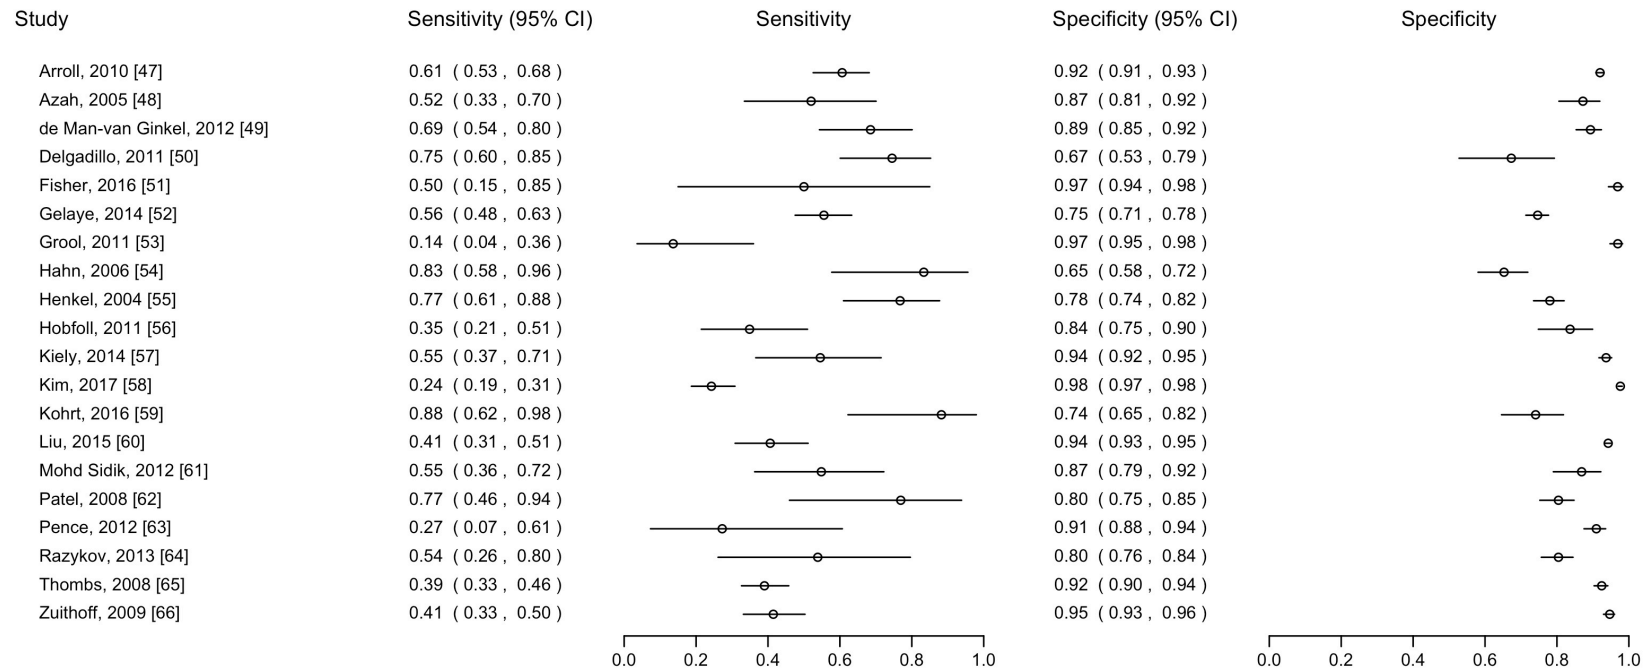

**eFigure 2aaa. Forest plots of sensitivity and specificity estimates for cutoff 3 of the PHQ-2 among participants verified to not currently be diagnosed or receiving treatment for a mental health problem, among studies that used a fully structured diagnostic interview as the reference standard (N Studies = 5; N Participants = 4,050; N major depression = 292)**

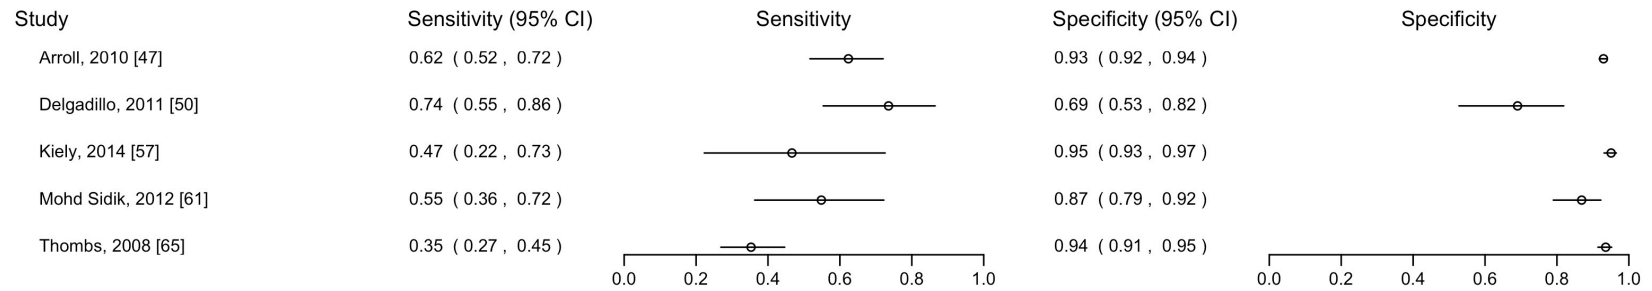

**eFigure 2aab. Forest plots of sensitivity and specificity estimates for cutoff 3 of the PHQ-2 among participants aged < 60, among studies that used a fully structured diagnostic interview as the reference standard (N Studies = 20; N Participants = 13,901; N major depression = 1,097)**

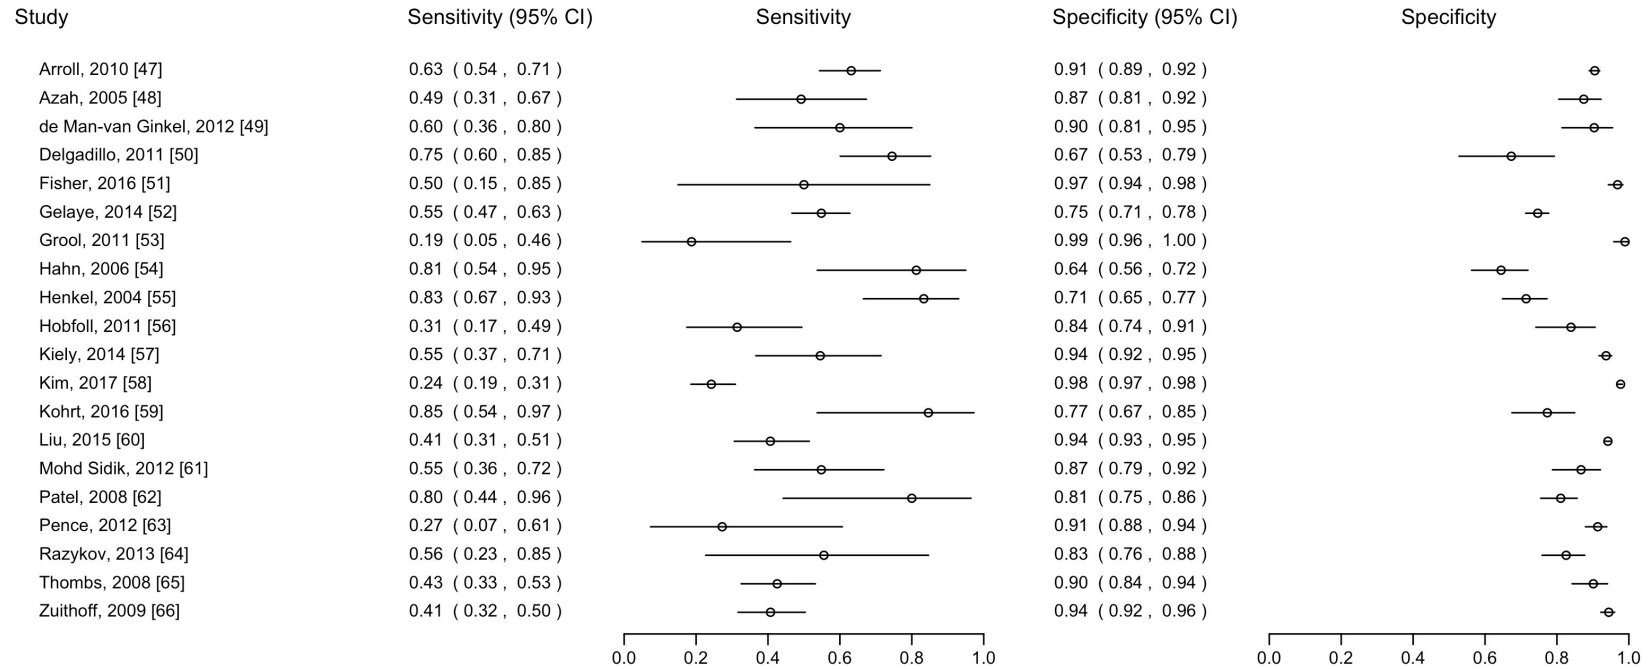

**eFigure 2aac. Forest plots of sensitivity and specificity estimates for cutoff 3 of the PHQ-2 among participants aged  $\geq 60$ , among studies that used a fully structured diagnostic interview as the reference standard (N Studies = 15; N Participants = 3,400; N major depression = 268)**

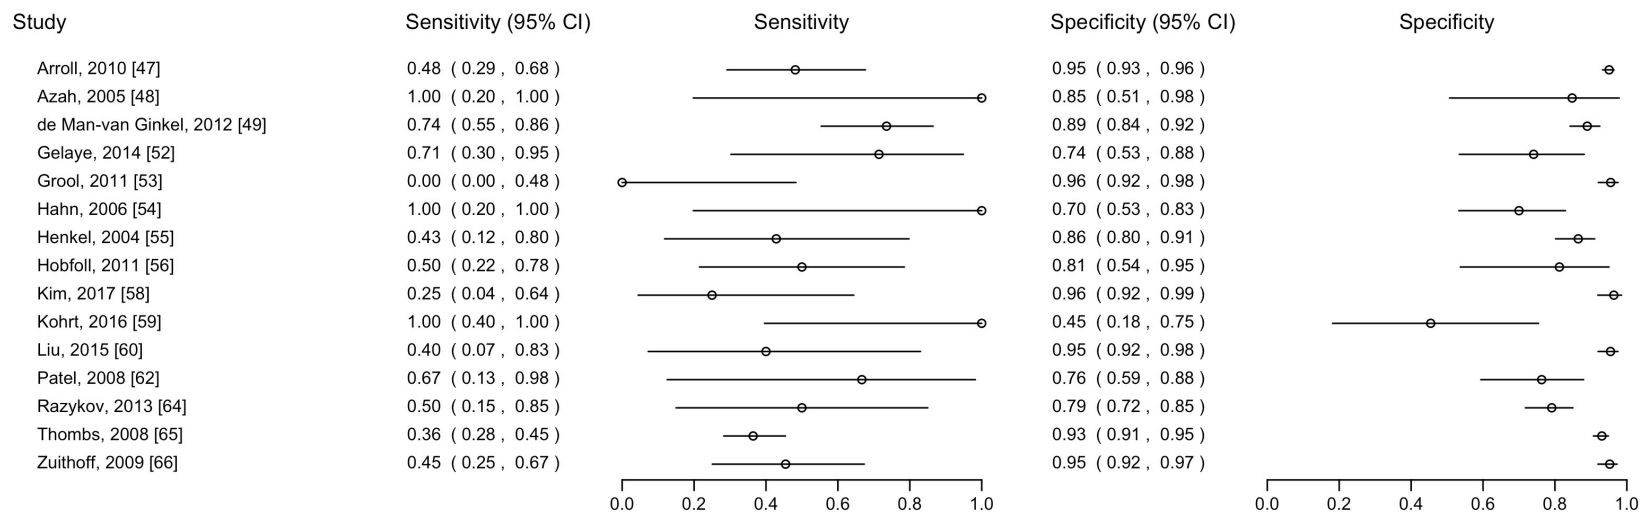

**eFigure 2aad. Forest plots of sensitivity and specificity estimates for cutoff 3 of the PHQ-2 among women, among studies that used a fully structured diagnostic interview as the reference standard (N Studies = 20; N Participants = 9,690; N major depression = 802)**

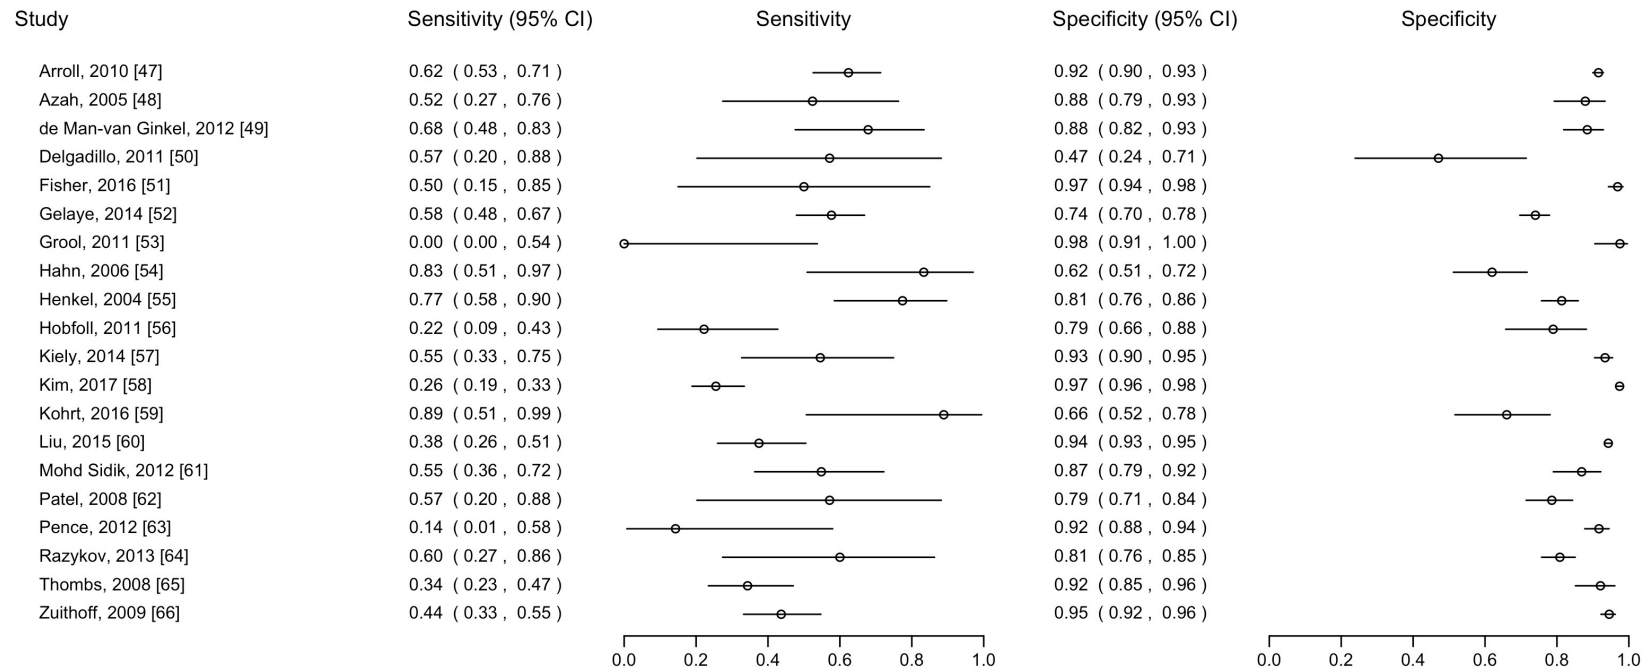

**eFigure 2aae. Forest plots of sensitivity and specificity estimates for cutoff 3 of the PHQ-2 among men, among studies that used a fully structured diagnostic interview as the reference standard (N Studies = 18; N Participants = 7,619; N major depression = 561)**

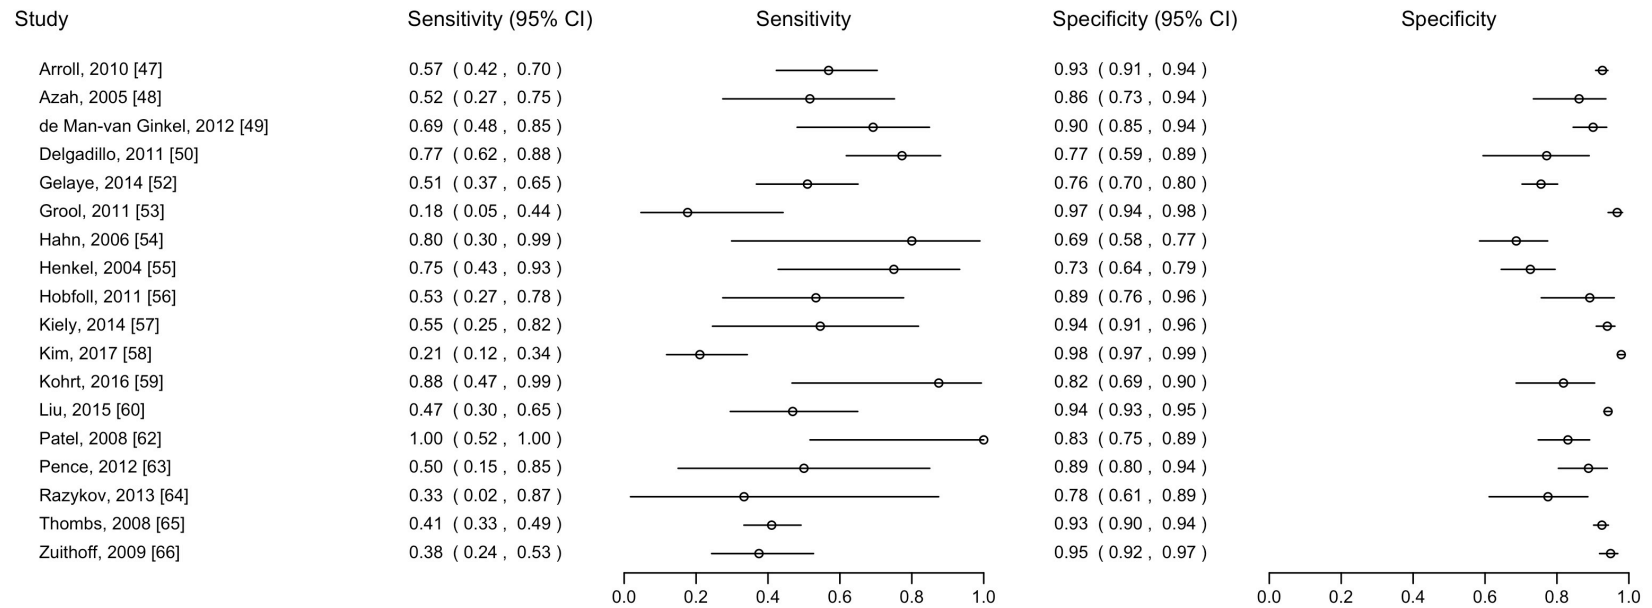



**eFigure 2aaf. Forest plots of sensitivity and specificity estimates for cutoff 3 of the PHQ-2 among participants from a country with a very high human development index, among studies that used a fully structured diagnostic interview as the reference standard (N Studies = 16; N Participants = 15,574; N major depression = 1,162)**

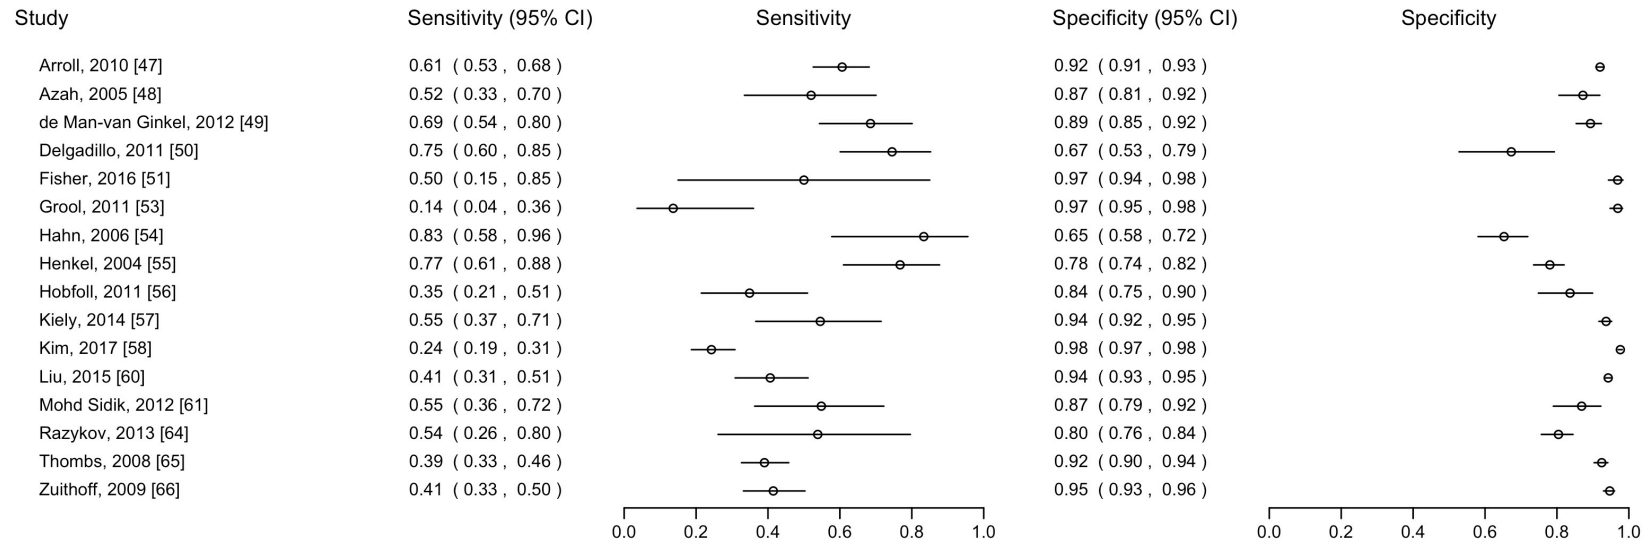

**eFigure 2aag. Forest plots of sensitivity and specificity estimates for cutoff 3 of the PHQ-2 among participants from a country with a low-medium human development index, among studies that used a fully structured diagnostic interview as the reference standard (N Studies = 4; N Participants = 1,745; N major depression = 203)**

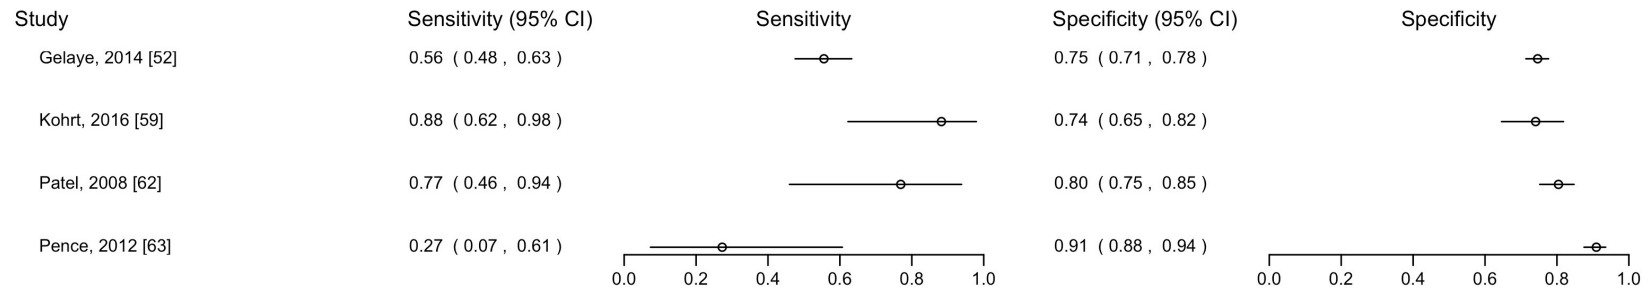

**eFigure 2aah. Forest plots of sensitivity and specificity estimates for cutoff 3 of the PHQ-2 among participants from a non-medical setting, among studies that used a fully structured diagnostic interview as the reference standard (N Studies = 4; N Participants = 8,316; N major depression = 378)**

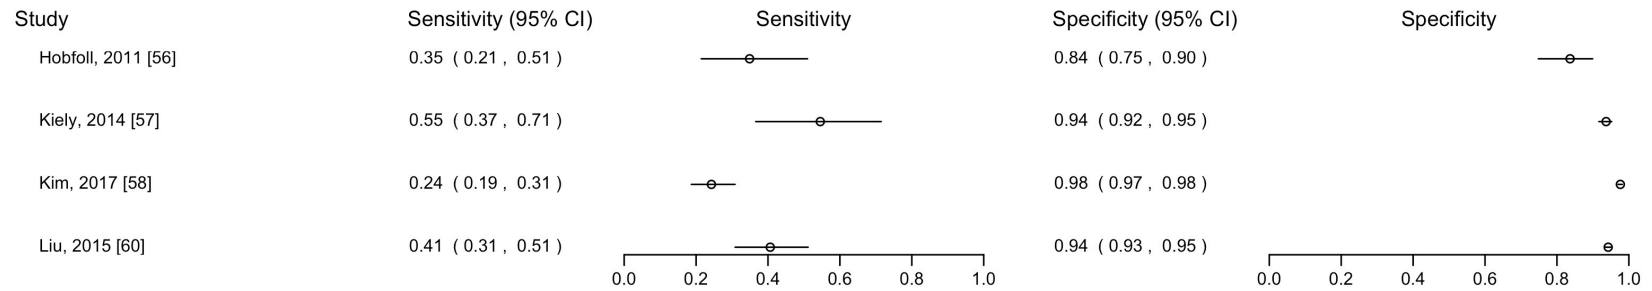

**eFigure 2aai. Forest plots of sensitivity and specificity estimates for cutoff 3 of the PHQ-2 among participants from a primary care setting, among studies that used a fully structured diagnostic interview as the reference standard (N Studies = 7; N**

**Participants = 4,789; N major depression = 429)**

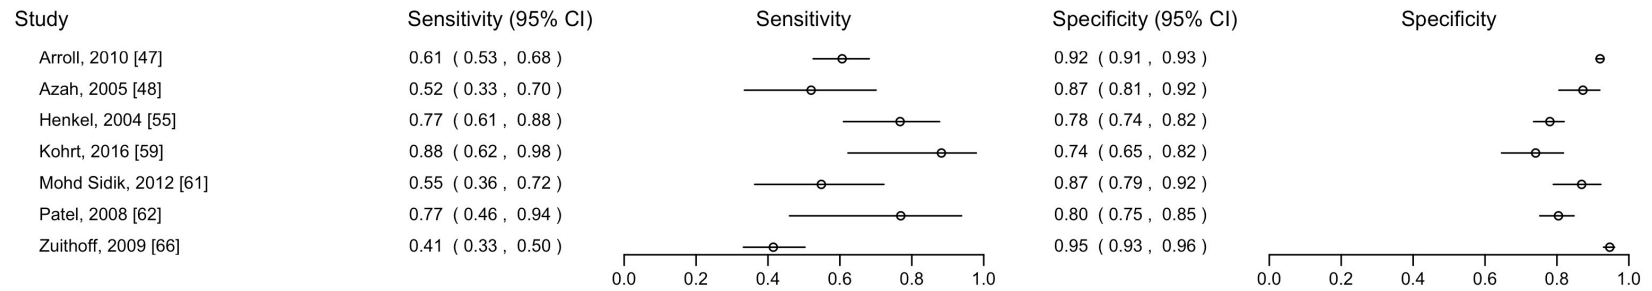

**eFigure 2aaj. Forest plots of sensitivity and specificity estimates for cutoff 3 of the PHQ-2 among participants from an inpatient specialty care setting, among studies that used a fully structured diagnostic interview as the reference standard (N Studies = 2; N Participants = 593; N major depression = 72)**

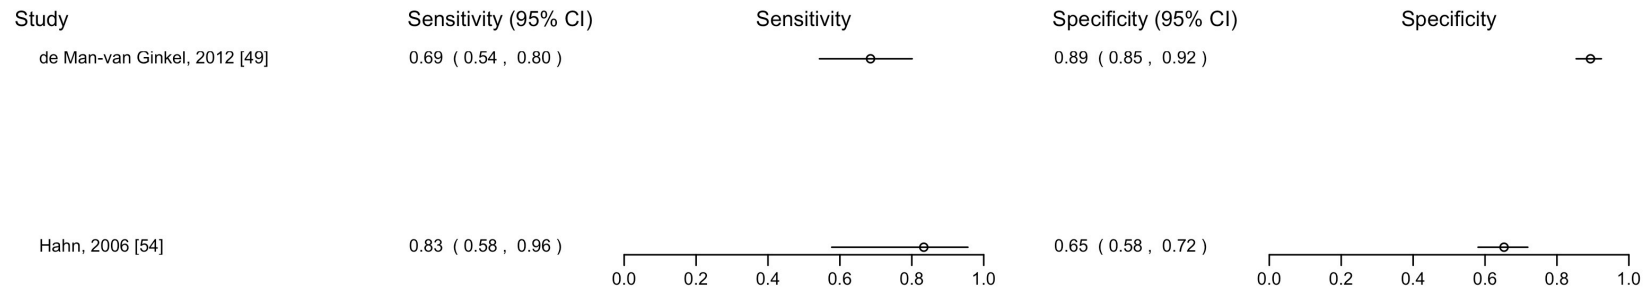

**eFigure 2aak. Forest plots of sensitivity and specificity estimates for cutoff 3 of the PHQ-2 among participants from an outpatient specialty care setting, among studies that used a fully structured diagnostic interview as the reference standard (N Studies = 7; N Participants = 3,621; N major depression = 486)**

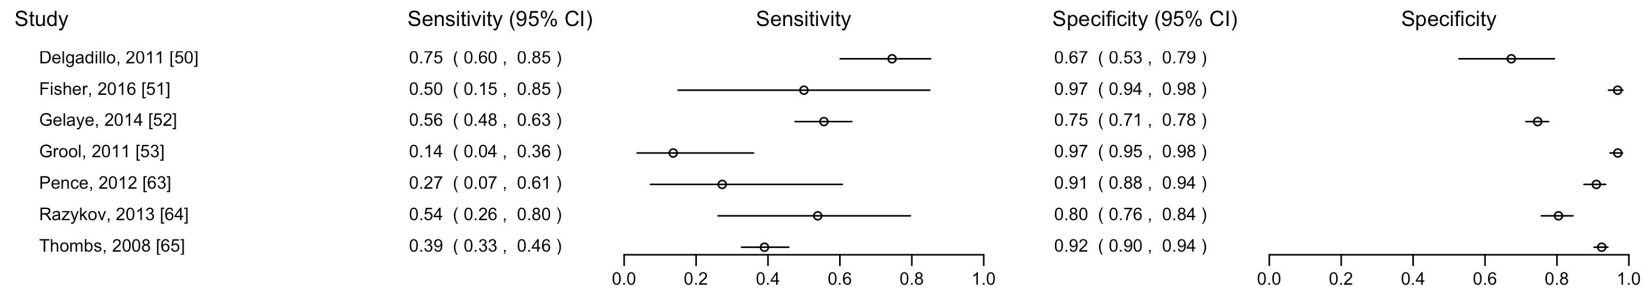

**eFigure 2aal. Forest plots of sensitivity and specificity estimates for cutoff 3 of the PHQ-2, among studies that used the MINI as the reference standard (N Studies = 32; N Participants = 15,296; N major depression = 1,669)**

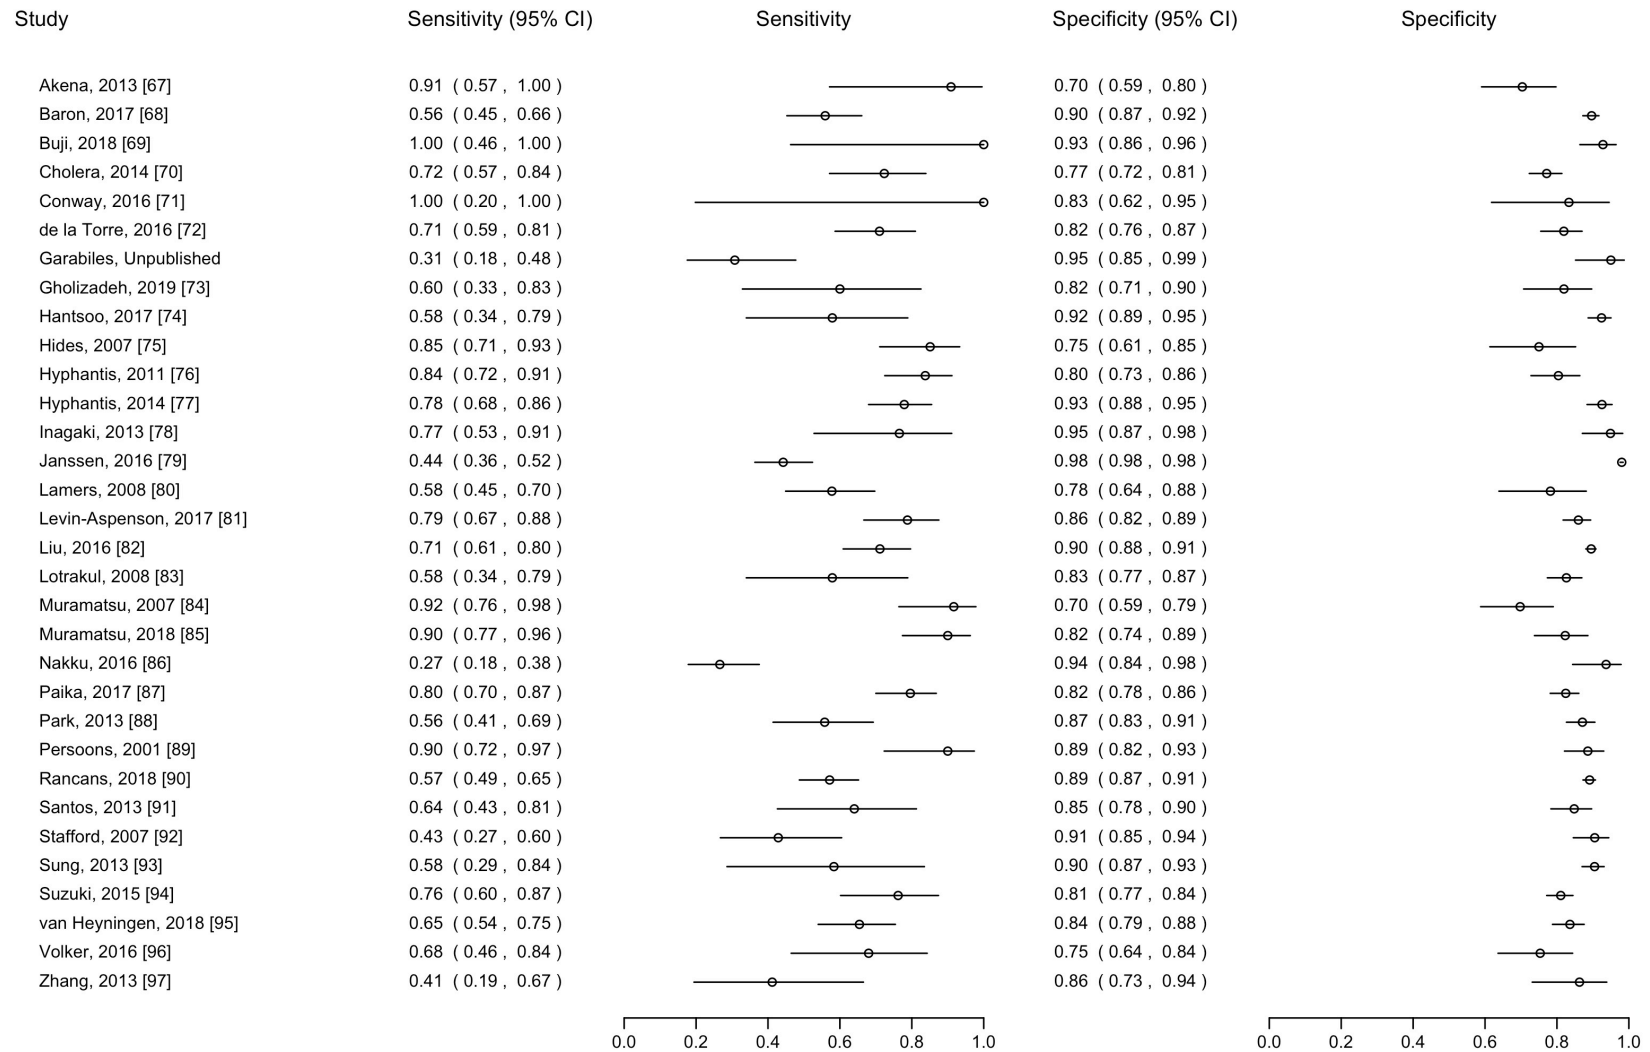

**eFigure 2aam. Forest plots of sensitivity and specificity estimates for cutoff 3 of the PHQ-2 among participants verified to not currently be diagnosed or receiving treatment for a mental health problem, among studies that used the MINI as the reference standard (N Studies = 15; N Participants = 8,390; N major depression = 581)**

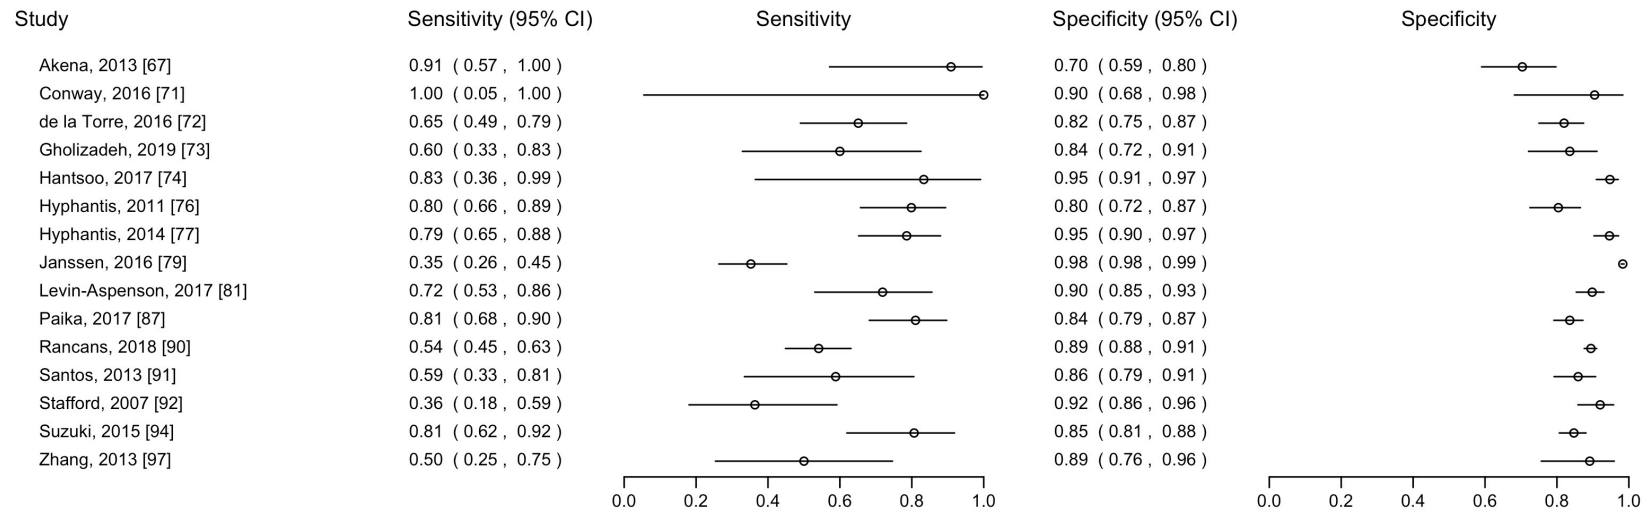



**eFigure 2aan. Forest plots of sensitivity and specificity estimates for cutoff 3 of the PHQ-2 among participants aged < 60, among studies that used the MINI as the reference standard (N Studies = 31; N Participants = 10,071; N major depression = 1,153)**

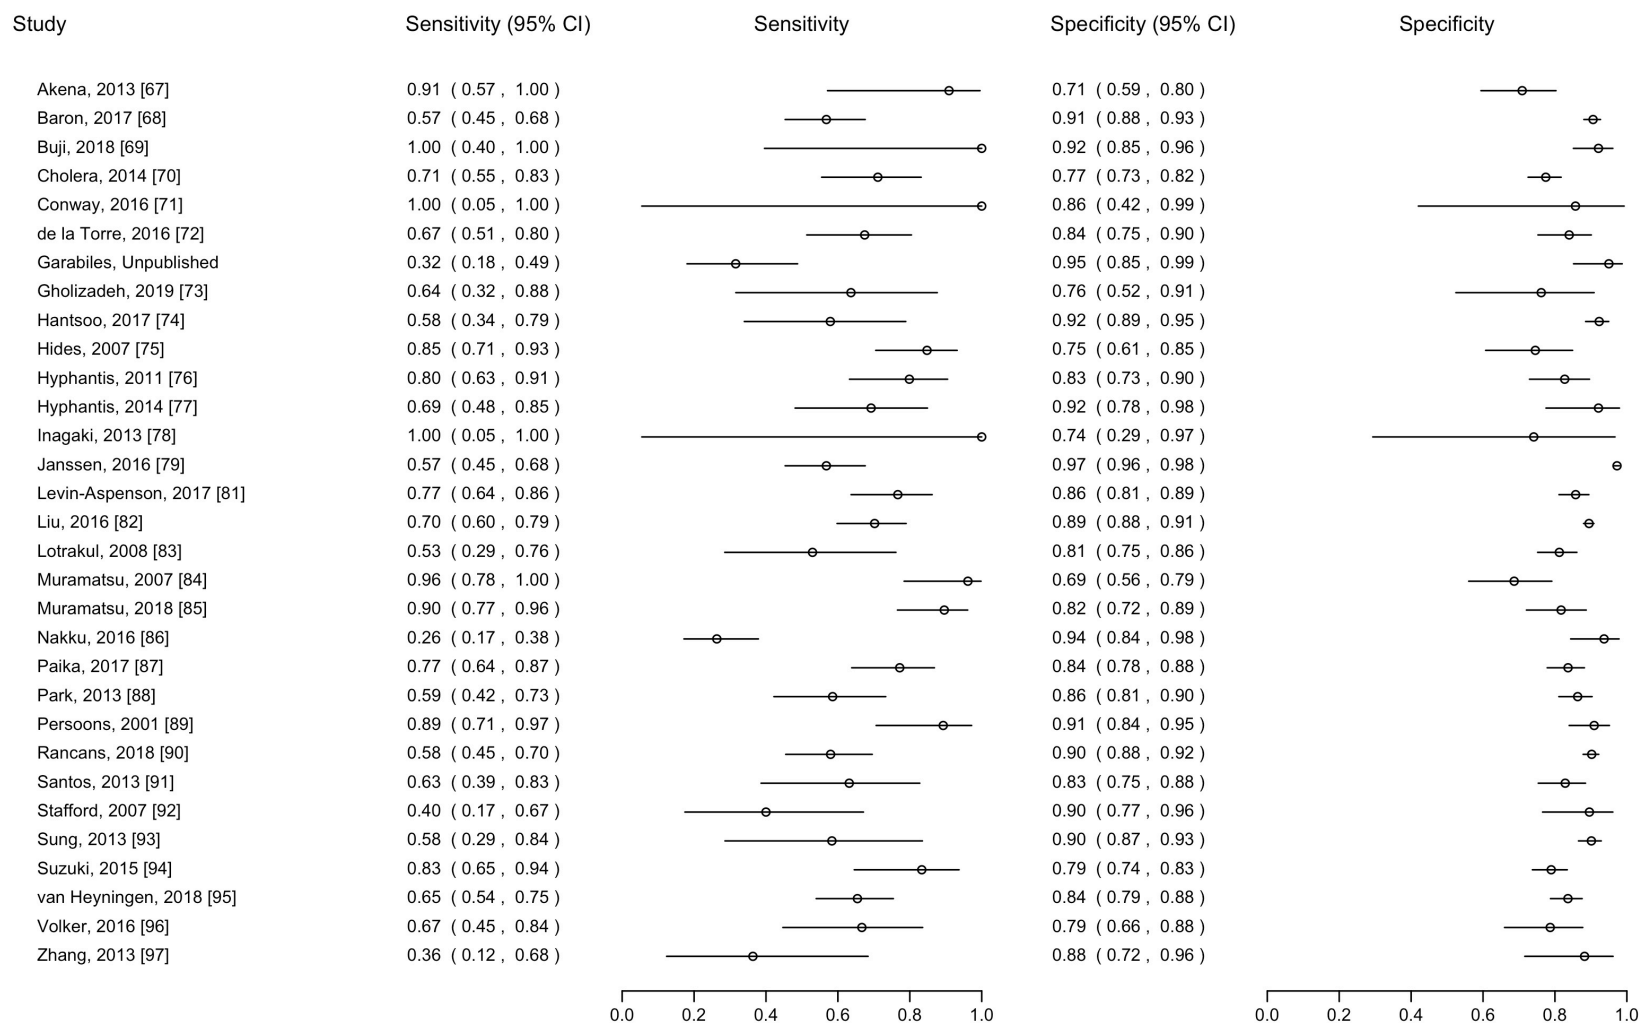

**eFigure 2aao. Forest plots of sensitivity and specificity estimates for cutoff 3 of the PHQ-2 among participants aged  $\geq 60$ , among studies that used the MINI as the reference standard (N Studies = 26; N Participants = 5,192; N major depression = 506)**

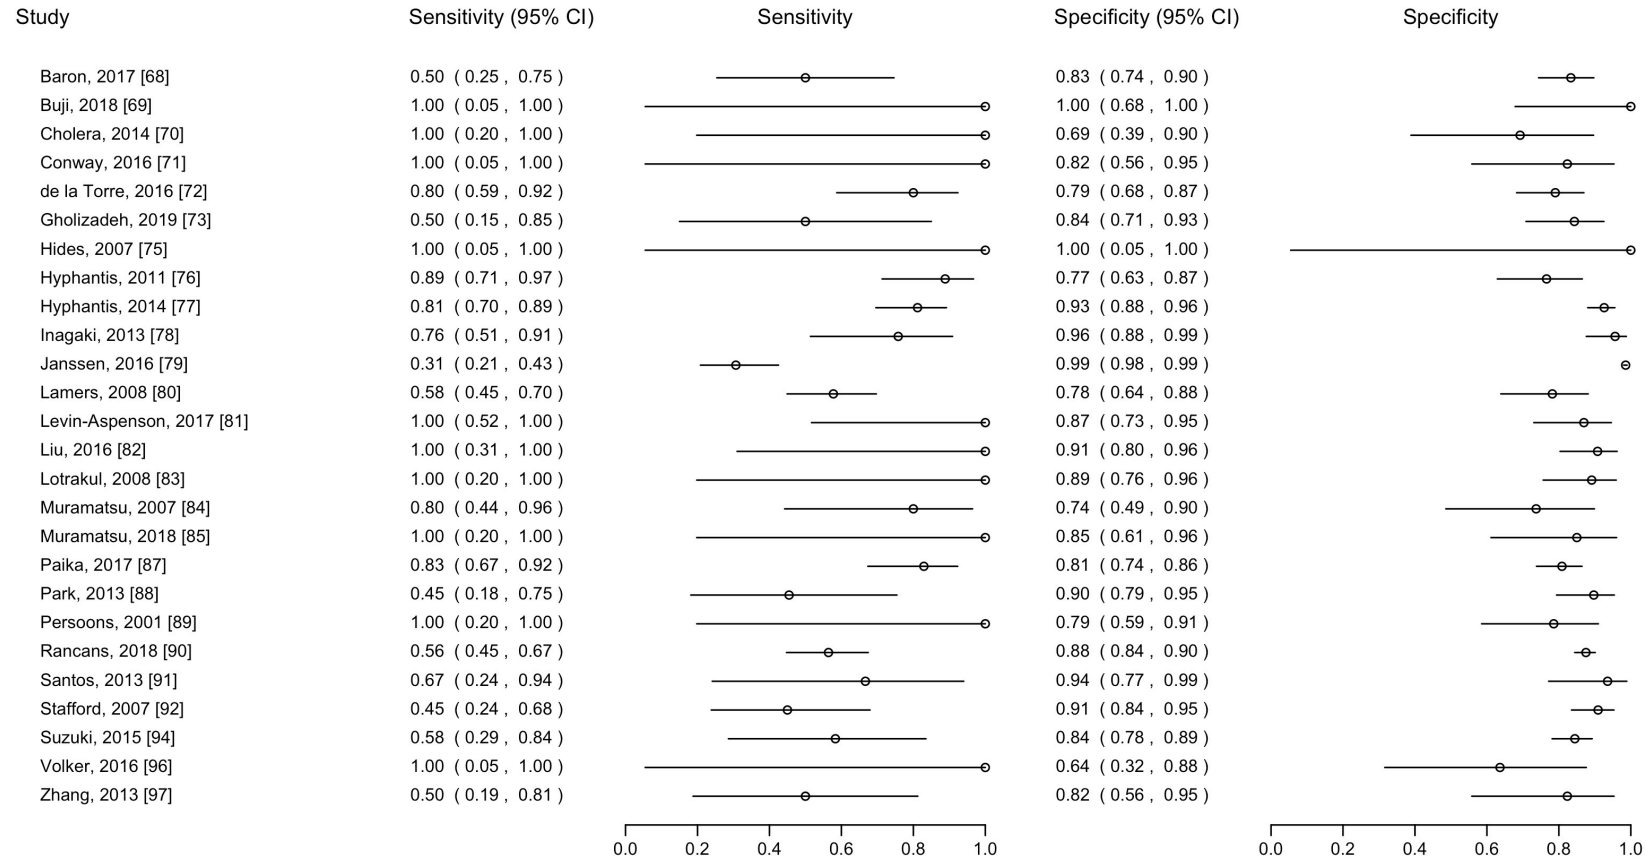

**eFigure 2aap. Forest plots of sensitivity and specificity estimates for cutoff 3 of the PHQ-2 among women, among studies that used the MINI as the reference standard (N Studies = 31; N Participants = 9,053; N major depression = 1,138)**

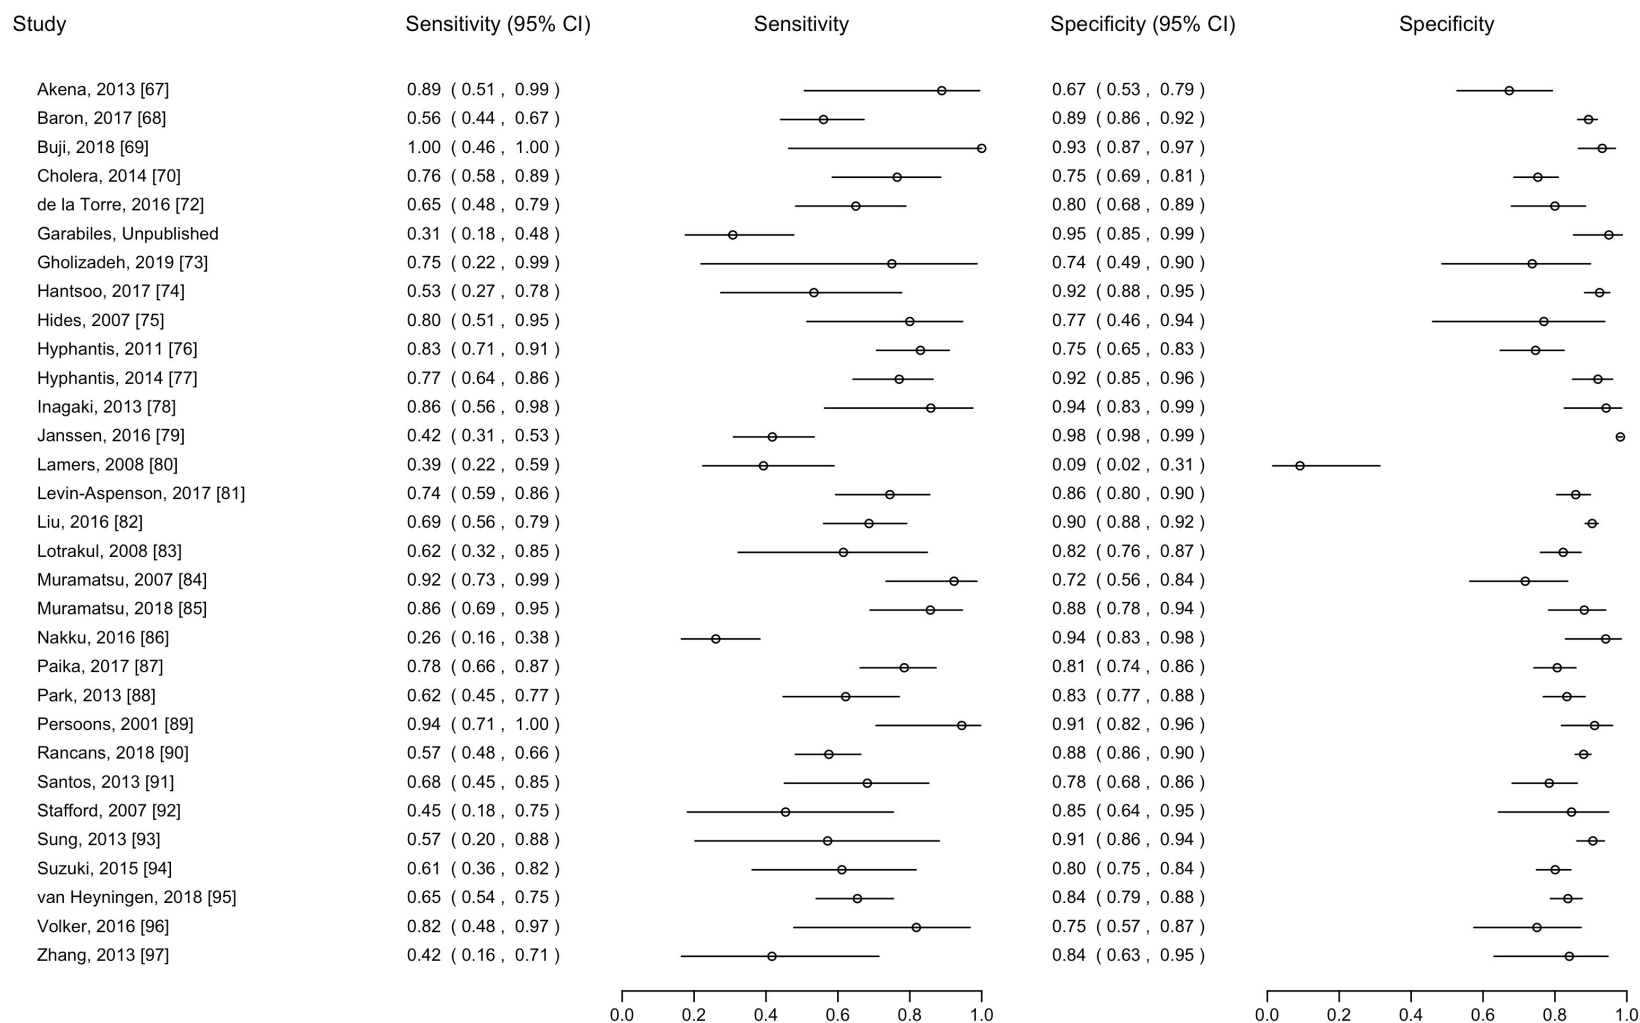

**eFigure 2aaq. Forest plots of sensitivity and specificity estimates for cutoff 3 of the PHQ-2 among men, among studies that used the MINI as the reference standard (N Studies = 29; N Participants = 6,225; N major depression = 530)**

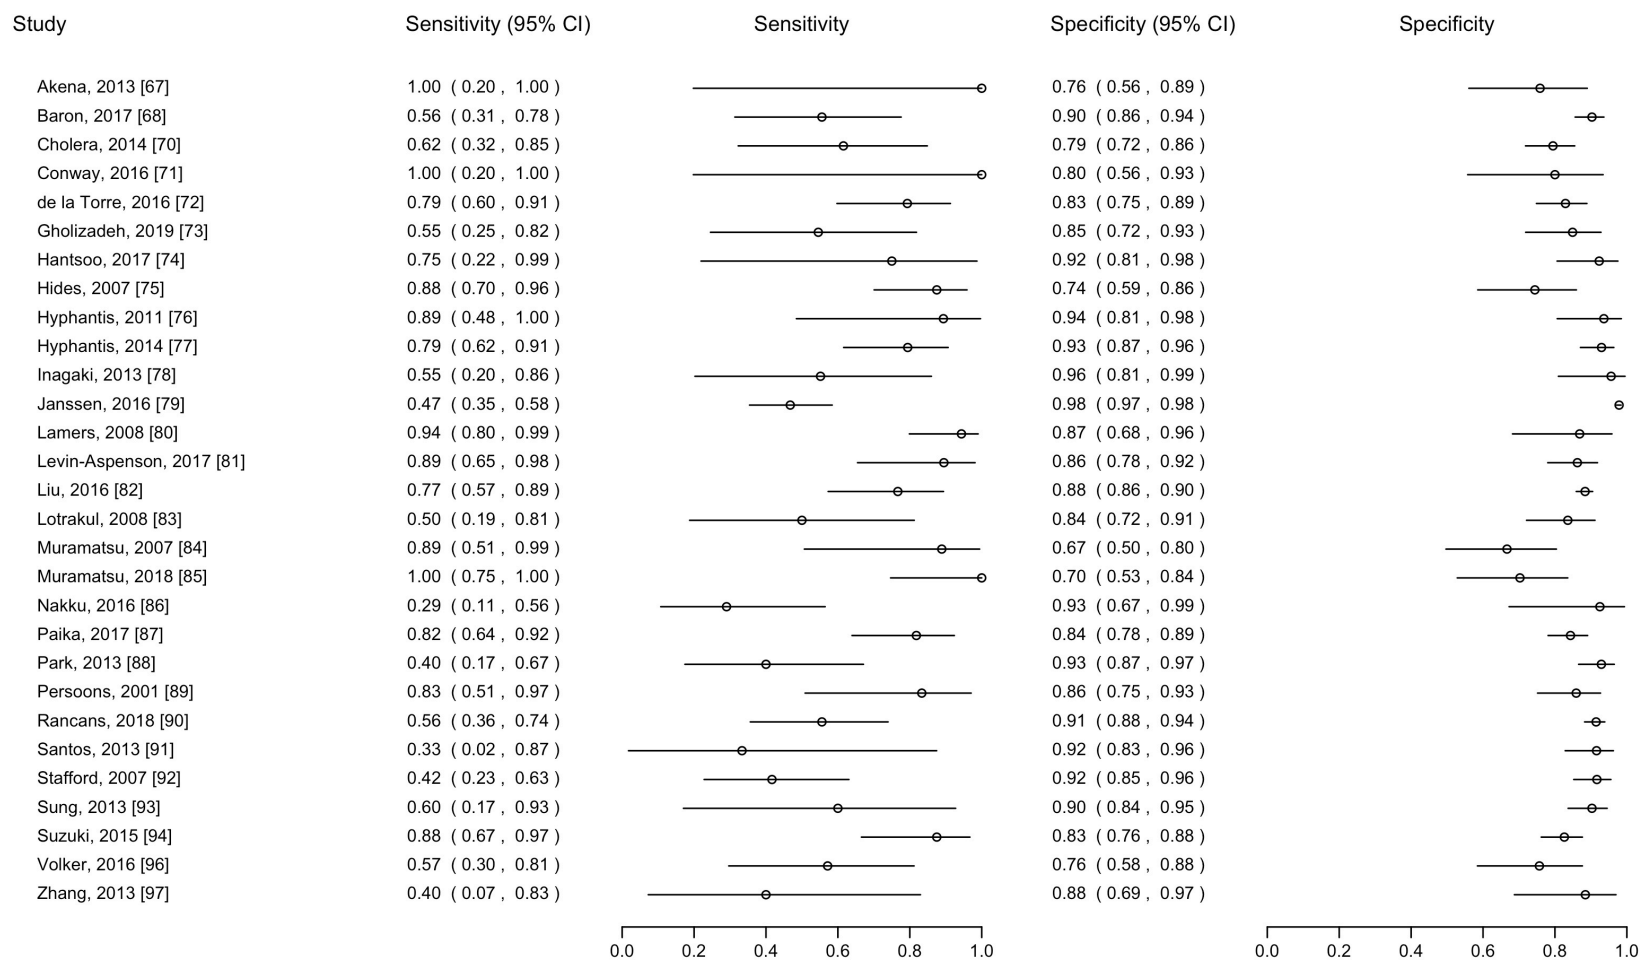

**eFigure 2aar. Forest plots of sensitivity and specificity estimates for cutoff 3 of the PHQ-2 among participants from a country with a very high human development index, among studies that used the MINI as the reference standard (N Studies = 21; N Participants = 10,699; N major depression = 1,141)**

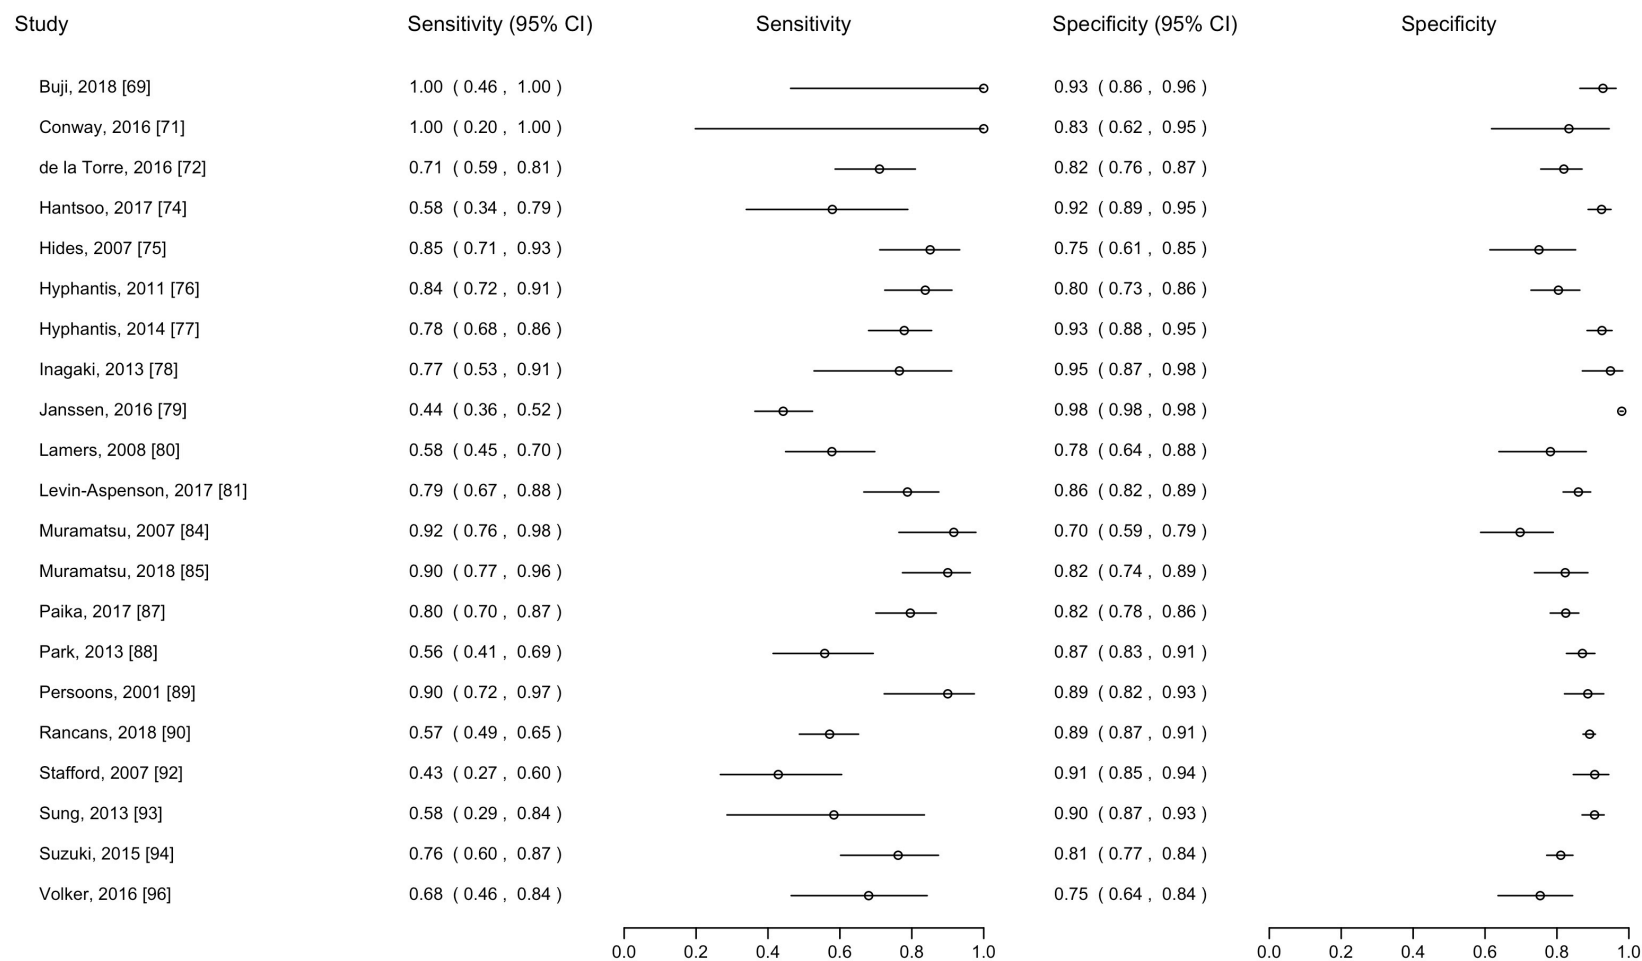

**eFigure 2aas. Forest plots of sensitivity and specificity estimates for cutoff 3 of the PHQ-2 among participants from a country with a high human development index, among studies that used the MINI as the reference standard (N Studies = 9; N Participants = 4,352; N major depression = 433)**

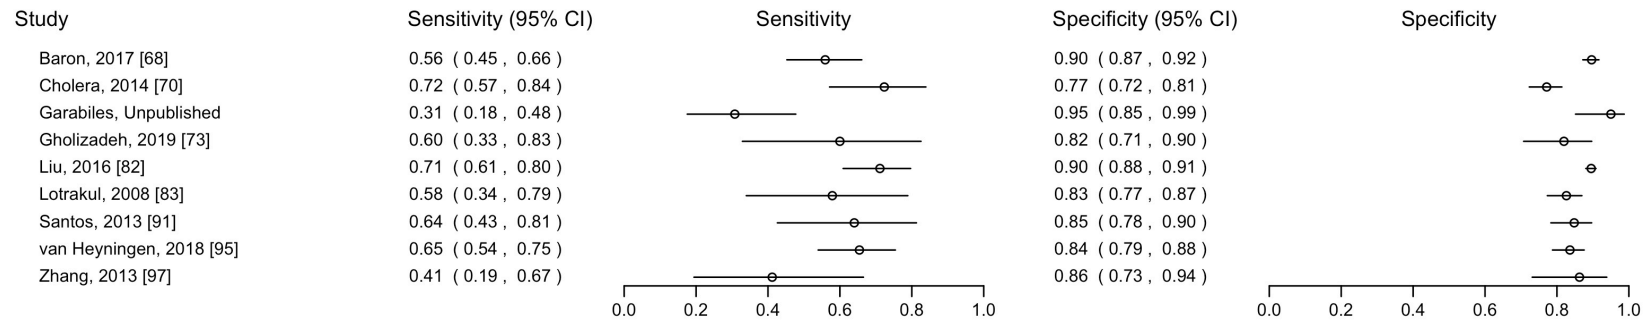

**eFigure 2aat. Forest plots of sensitivity and specificity estimates for cutoff 3 of the PHQ-2 among participants from a country with a low-medium human development index, among studies that used the MINI as the reference standard (N Studies = 2; N Participants = 245; N major depression = 95)**

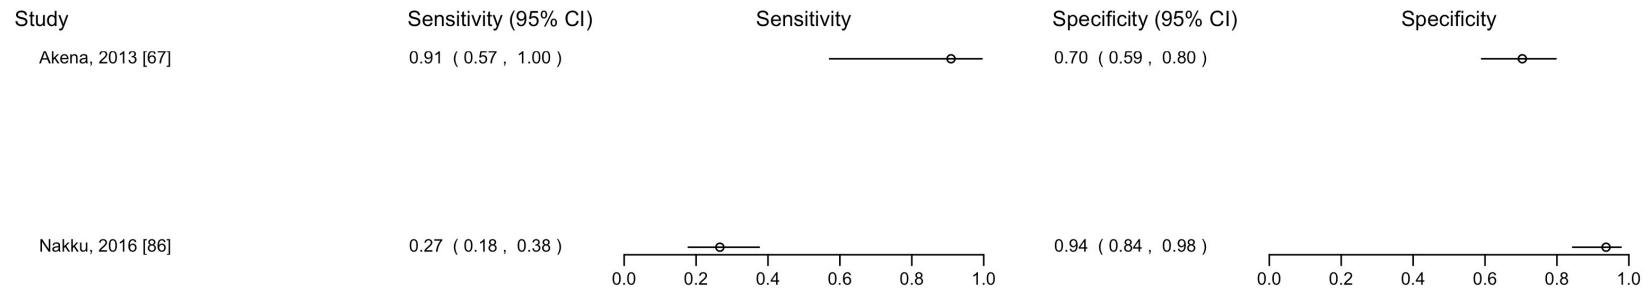

**eFigure 2aau. Forest plots of sensitivity and specificity estimates for cutoff 3 of the PHQ-2 among participants from a non-medical setting, among studies that used the MINI as the reference standard (N Studies = 8; N Participants = 6,792; N major depression = 470)**

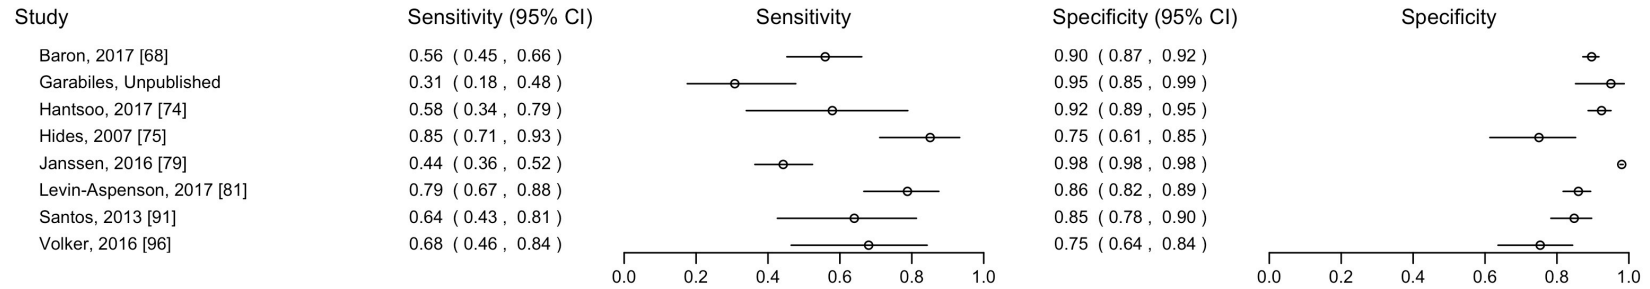



**eFigure 2aav. Forest plots of sensitivity and specificity estimates for cutoff 3 of the PHQ-2 among participants from a primary care setting, among studies that used the MINI as the reference standard (N Studies = 9; N Participants = 5,092; N major depression = 557)**

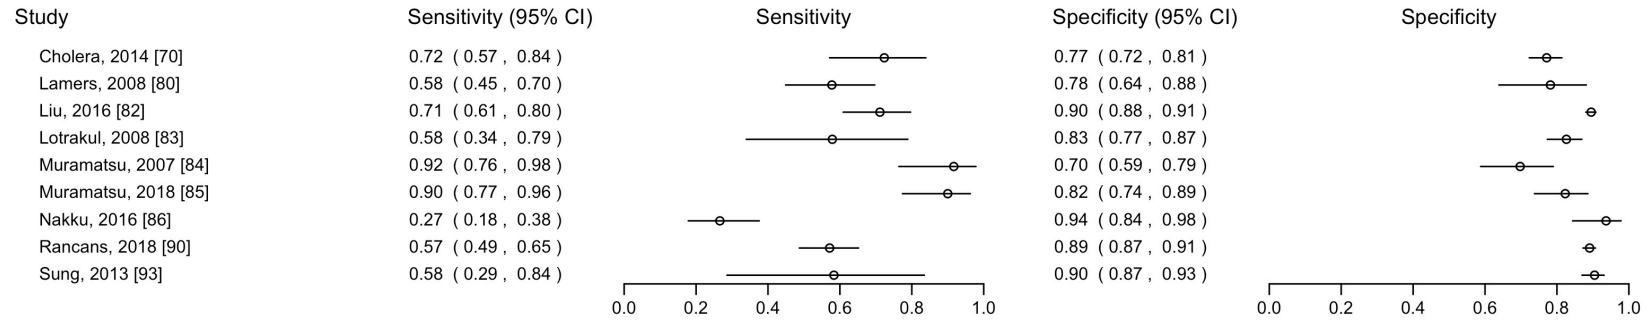

**eFigure 2aaw. Forest plots of sensitivity and specificity estimates for cutoff 3 of the PHQ-2 among participants from an inpatient specialty care setting, among studies that used the MINI as the reference standard (N Studies = 4; N Participants = 619; N major depression = 135)**

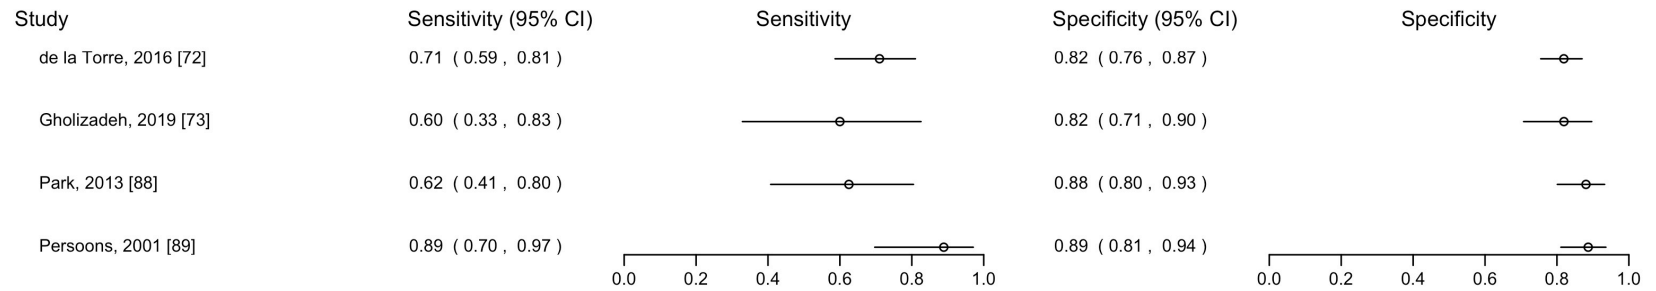

**eFigure 2aax. Forest plots of sensitivity and specificity estimates for cutoff 3 of the PHQ-2 among participants from an outpatient specialty care setting, among studies that used the MINI as the reference standard (N Studies = 12; N Participants = 2,663; N major depression = 502)**

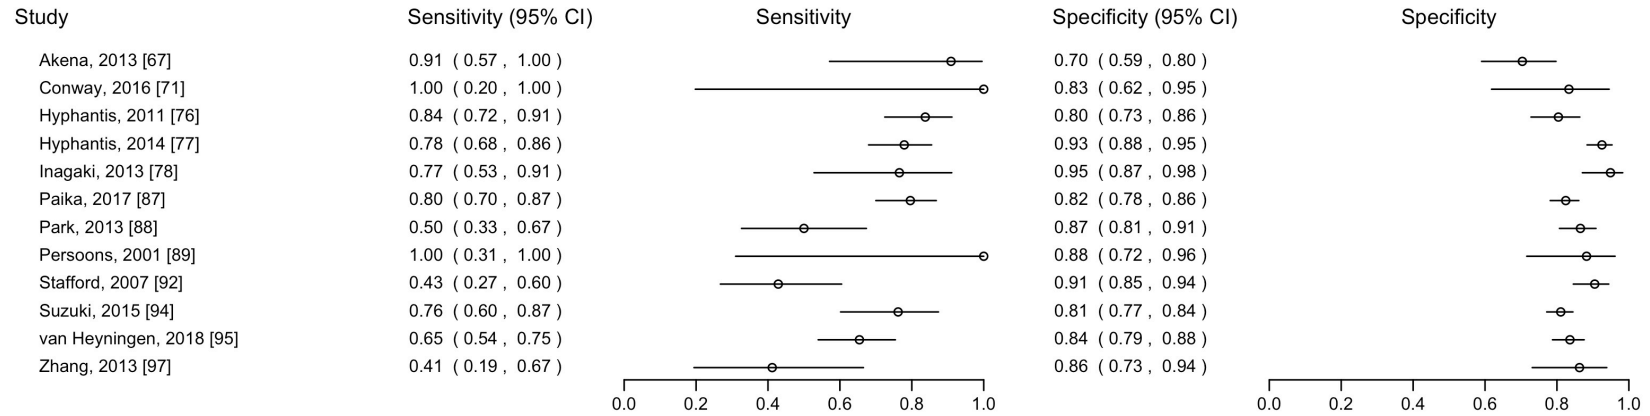

**eFigure 3a. Nomogram of positive predictive values for assumed major depression prevalence of 5-25% for PHQ-2  $\geq$  2, based on accuracy estimates among studies with a semi-structured reference standard and PHQ-9 scores available (N studies = 44, N participants = 10,627, N major depression = 1,361)**

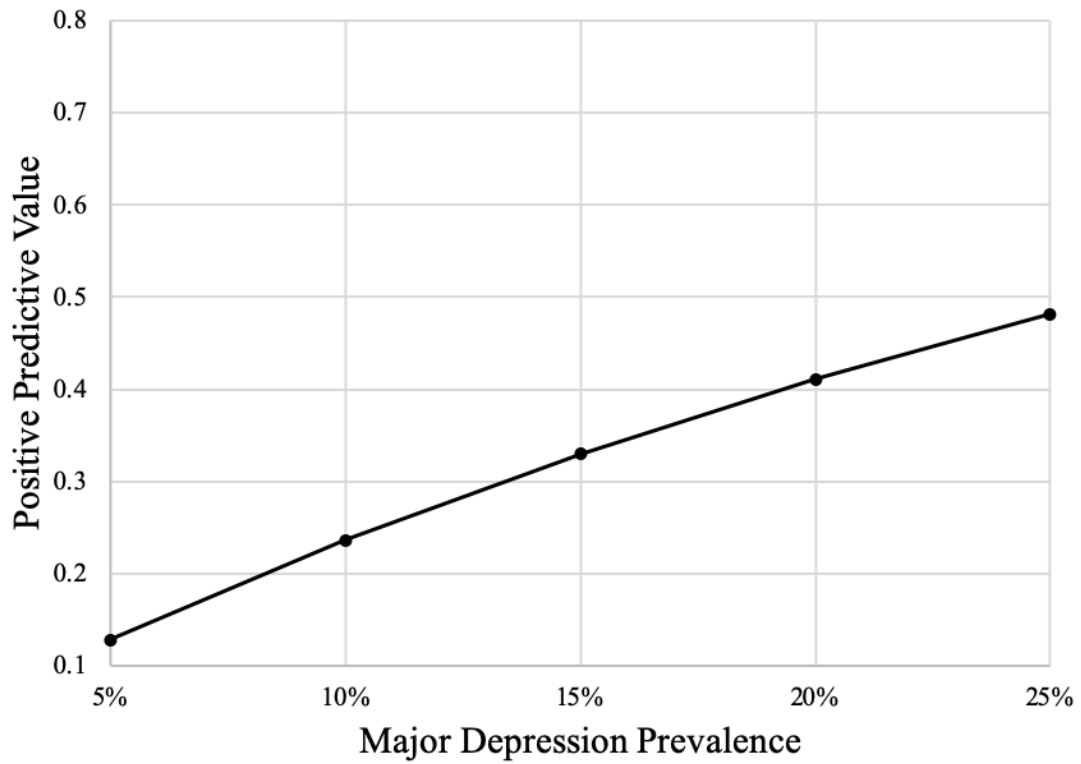

**eFigure 3b. Nomogram of negative predictive values for assumed major depression prevalence of 5-25% for PHQ-2  $\geq$  2, based on accuracy estimates among studies with a semi-structured reference standard and PHQ-9 scores available (N studies = 44, N participants = 10,627, N major depression = 1,361)**

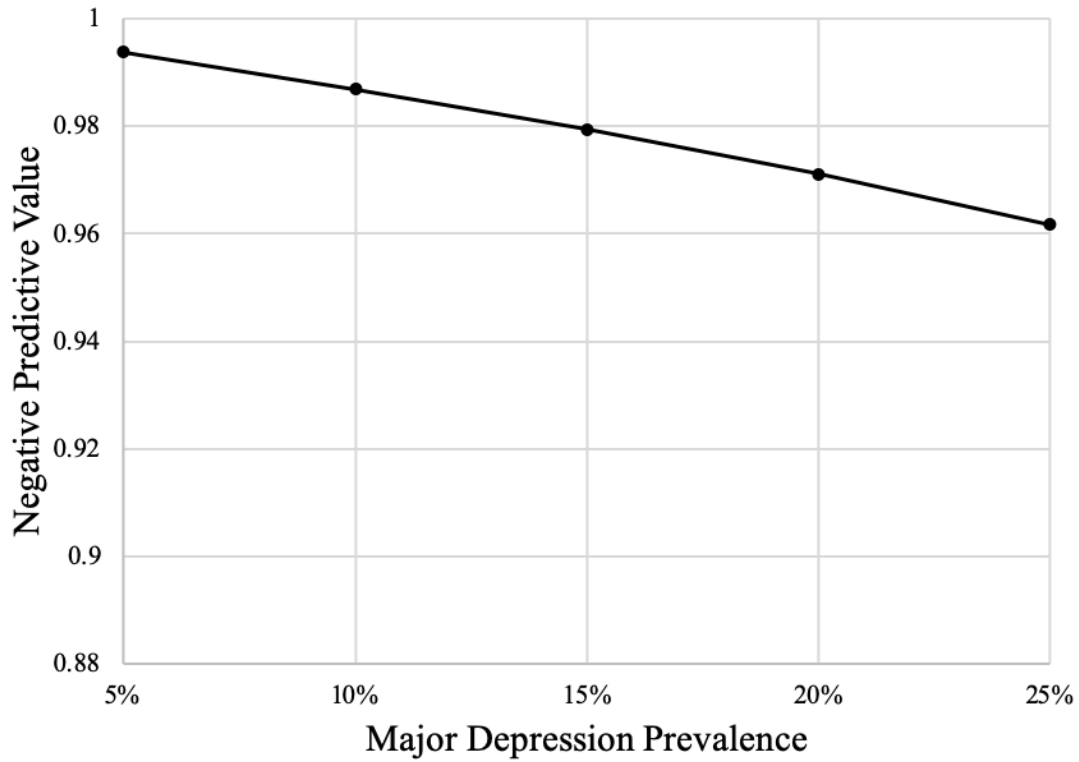

**eFigure 3c. Nomogram of positive predictive values for assumed major depression prevalence of 5-25% for PHQ-2  $\geq$  3, based on accuracy estimates among studies with a semi-structured reference standard and PHQ-9 scores available (N studies = 44, N participants = 10,627, N major depression = 1,361)**

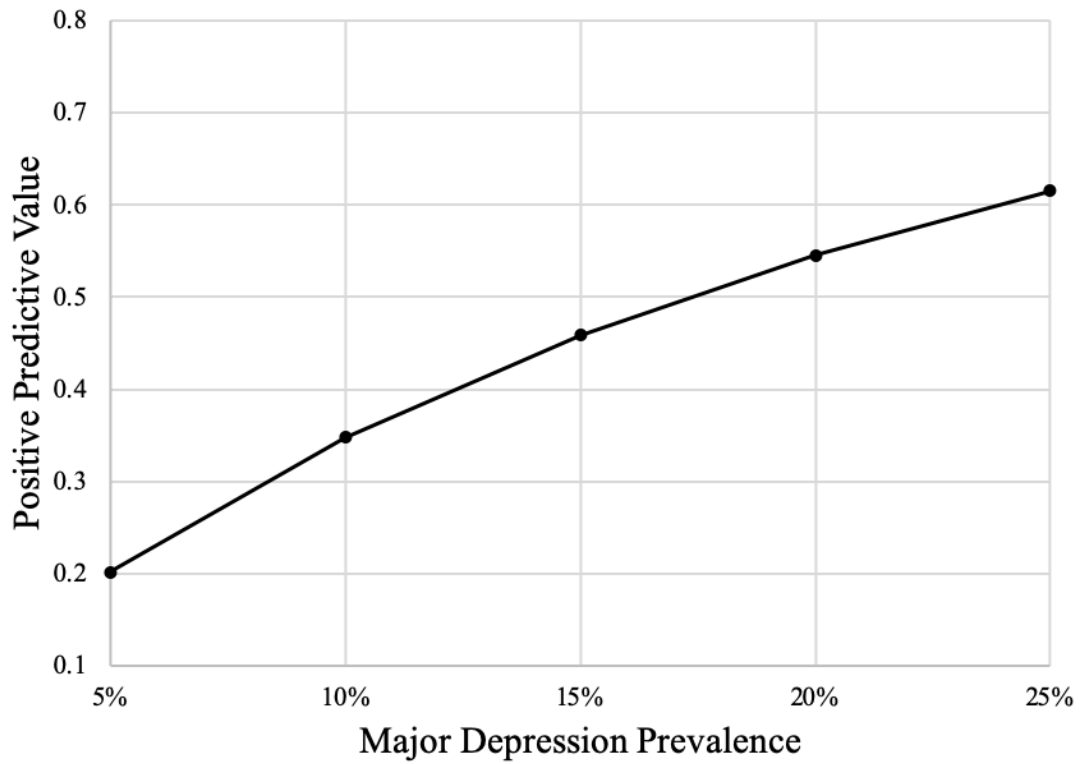

**eFigure 3d. Nomogram of negative predictive values for assumed major depression prevalence of 5-25% for PHQ-2  $\geq$  3, based on accuracy estimates among studies with a semi-structured reference standard and PHQ-9 scores available (N studies = 44, N participants = 10,627, N major depression = 1,361)**

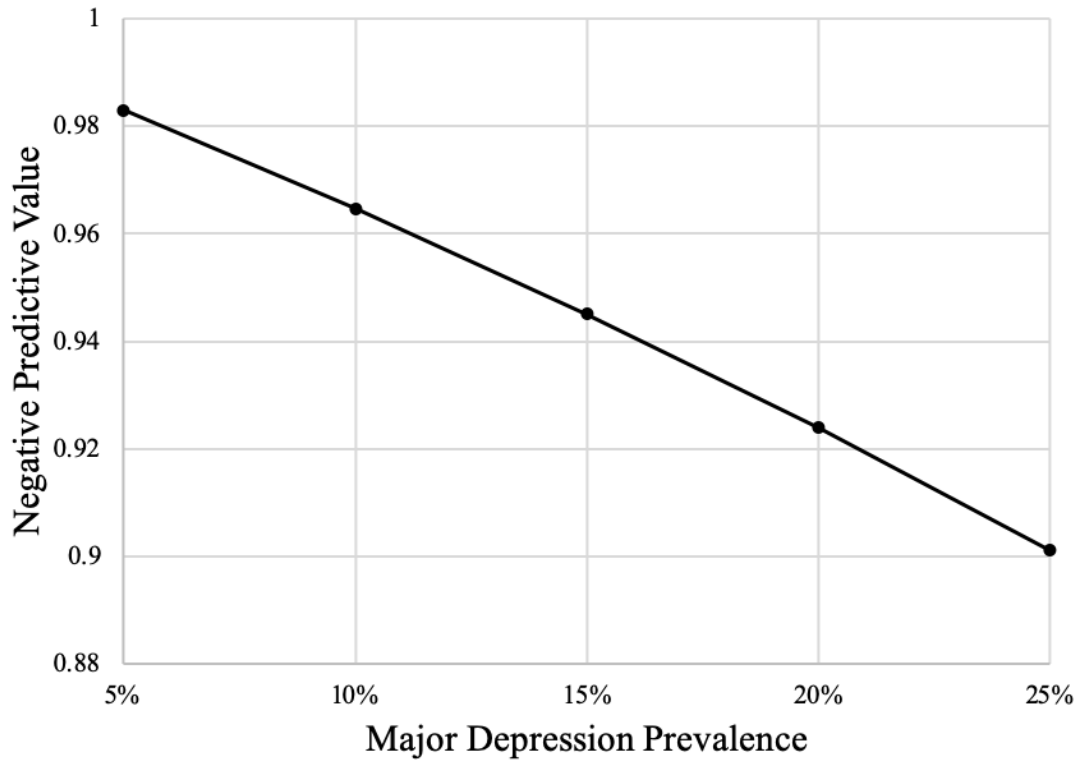

**eFigure 3e. Nomogram of positive predictive values for assumed major depression prevalence of 5-25% for PHQ-2  $\geq 2$  followed by PHQ-9  $\geq 10$ , based on accuracy estimates among studies with a semi-structured reference standard and PHQ-9 scores available (N studies = 44, N participants = 10,627, N major depression = 1,361)**

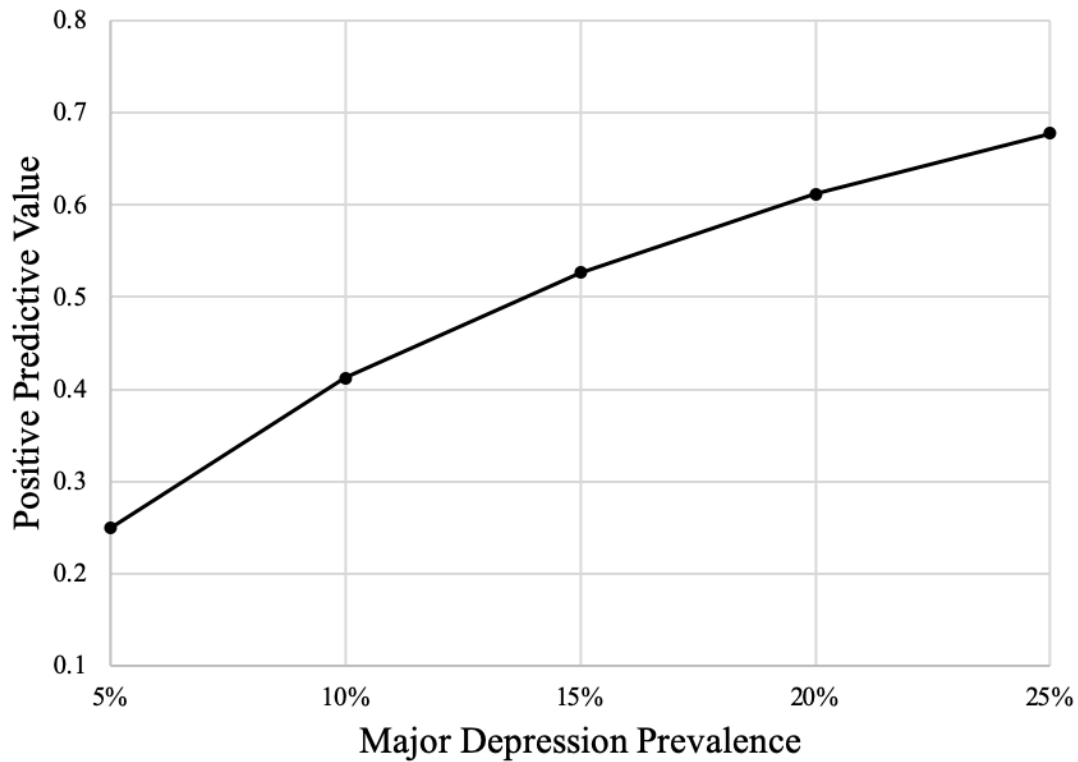



**eFigure 3f. Nomogram of negative predictive values for assumed major depression prevalence of 5-25% for PHQ-2  $\geq 2$  followed by PHQ-9  $\geq 10$ , based on accuracy estimates among studies with a semi-structured reference standard and PHQ-9 scores available (N studies = 44, N participants = 10,627, N major depression = 1,361)**

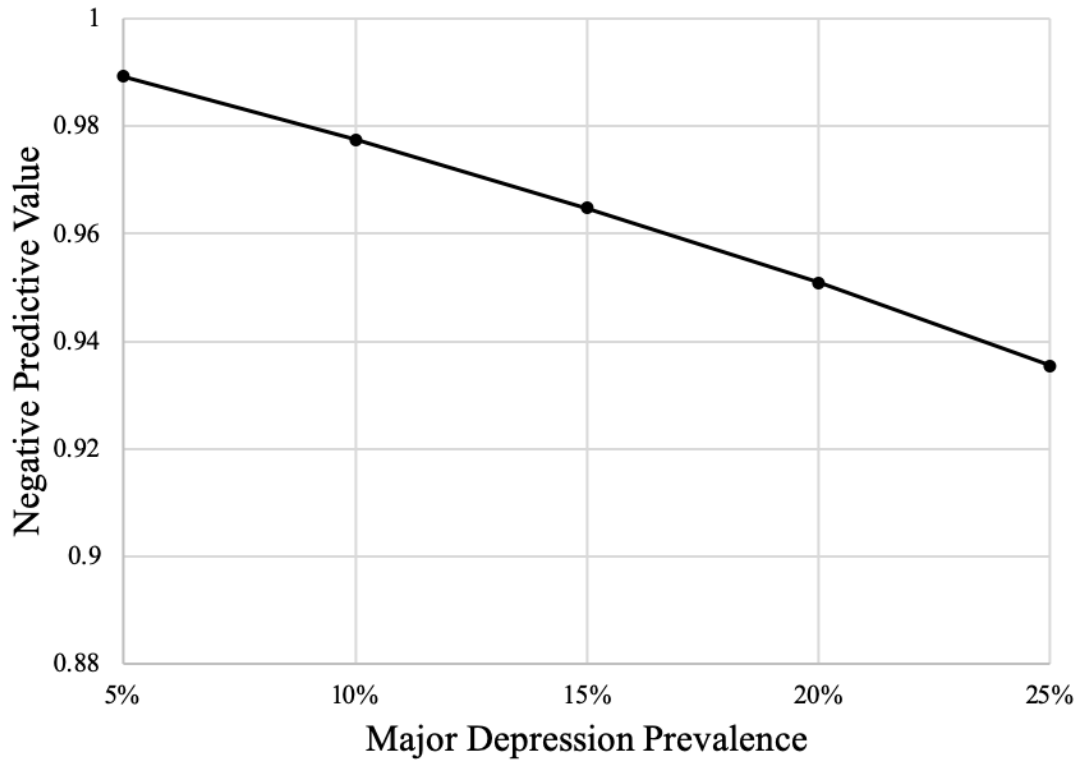

**eFigure 3g. Nomogram of positive predictive values for assumed major depression prevalence of 5-25% for PHQ-2  $\geq 3$  followed by PHQ-9  $\geq 10$ , based on accuracy estimates among studies with a semi-structured reference standard and PHQ-9 scores available (N studies = 44, N participants = 10,627, N major depression = 1,361)**

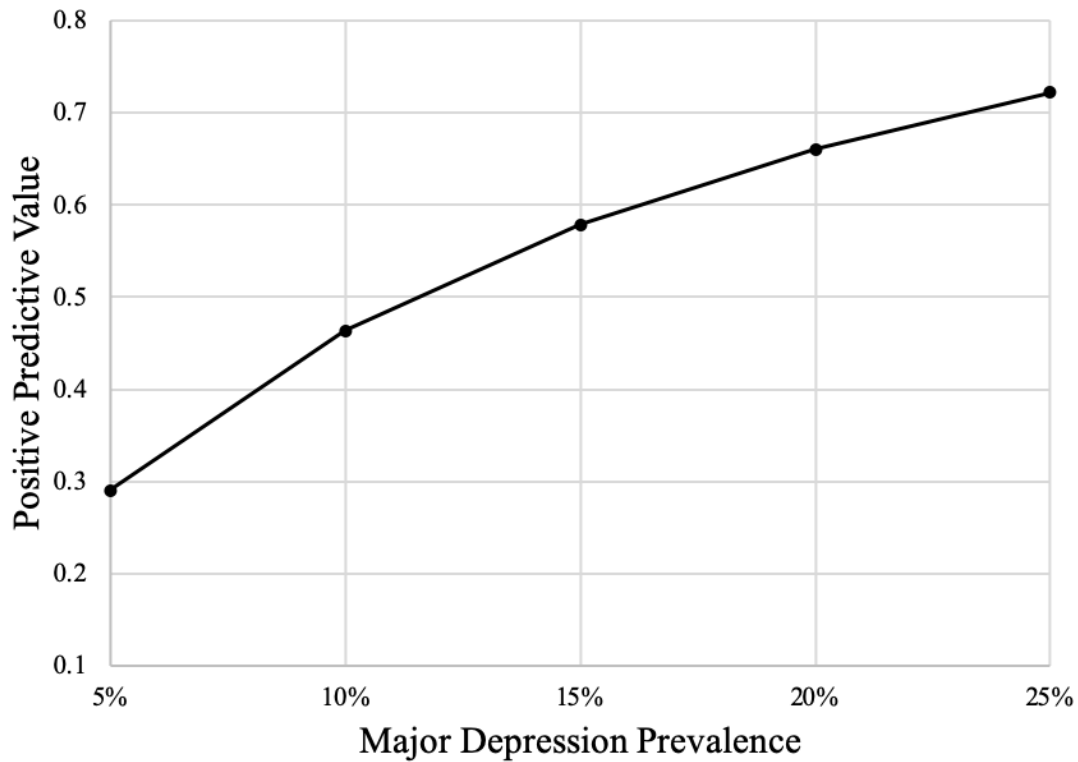

**eFigure 3h. Nomogram of negative predictive values for assumed major depression prevalence of 5-25% for PHQ-2  $\geq 3$  followed by PHQ-9  $\geq 10$ , based on accuracy estimates among studies with a semi-structured reference standard and PHQ-9 scores available (N studies = 44, N participants = 10,627, N major depression = 1,361)**

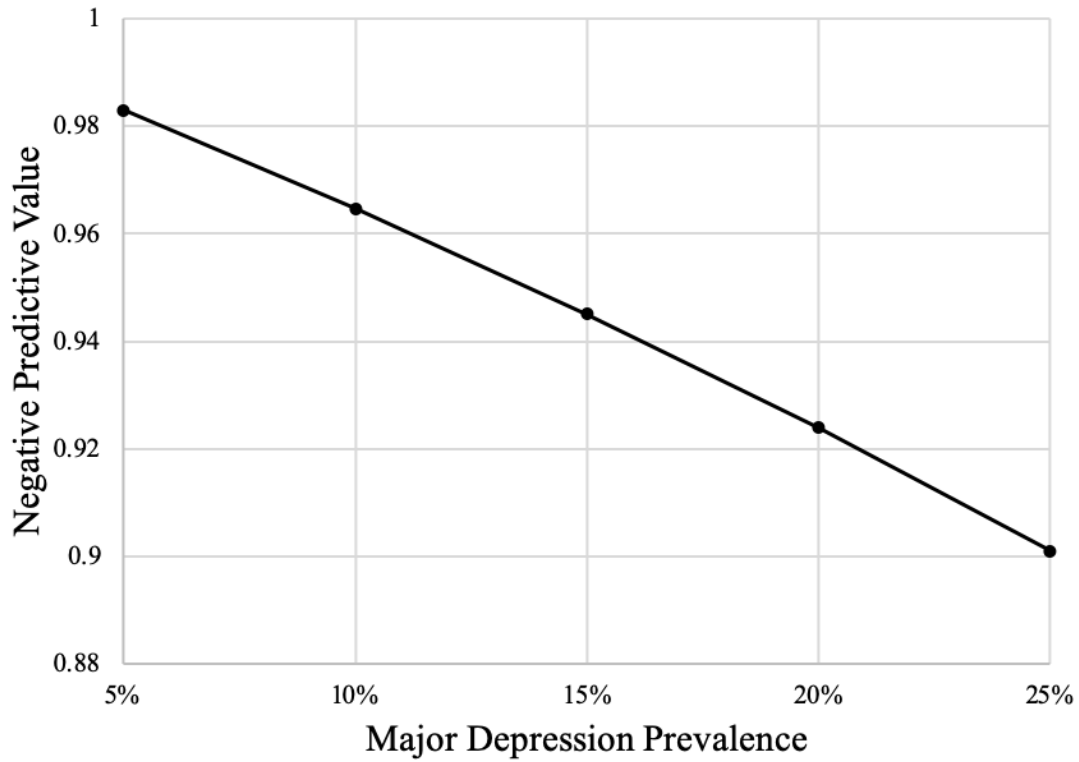

**eTable 1a. Characteristics of included primary studies**

| First Author, Year                      | Country      | Recruited Population                                                                     | Diagnostic Interview | Classification System | Total N | Major Depression N (%) |
|-----------------------------------------|--------------|------------------------------------------------------------------------------------------|----------------------|-----------------------|---------|------------------------|
| <b>Semi-structured Interviews</b>       |              |                                                                                          |                      |                       |         |                        |
| <b>Amoozegar, 2017<sup>1</sup></b>      | Canada       | Migraine patients                                                                        | SCID                 | DSM-IV                | 206     | 50 (24)                |
| <b>Amtmann, 2015<sup>2</sup></b>        | USA          | Multiple sclerosis patients                                                              | SCID                 | DSM-IV                | 164     | 48 (29)                |
| <b>Ayalon, 2010<sup>3</sup></b>         | Israel       | Elderly primary care patients                                                            | SCID                 | DSM-IV                | 152     | 6 (4)                  |
| <b>Beraldi, 2014<sup>4</sup></b>        | Germany      | Cancer inpatients                                                                        | SCID                 | DSM-IV                | 123     | 9 (7)                  |
| <b>Bernstein, 2018<sup>5</sup></b>      | Canada       | Inflammatory bowel disease patients                                                      | SCID                 | DSM-IV                | 242     | 21 (9)                 |
| <b>Bhana, 2015<sup>6</sup></b>          | South Africa | Chronic care patients                                                                    | SCID                 | DSM-IV                | 679     | 78 (11)                |
| <b>Bombardier, 2012<sup>7</sup></b>     | USA          | Inpatients with spinal cord injuries                                                     | SCID                 | DSM-IV                | 161     | 14 (9)                 |
| <b>Chagas, 2013<sup>8</sup></b>         | Brazil       | Outpatients with Parkinson's Disease                                                     | SCID                 | DSM-IV                | 84      | 19 (23)                |
| <b>Chibanda, 2016<sup>9</sup></b>       | Zimbabwe     | A primary care population with high HIV prevalence                                       | SCID                 | DSM-IV                | 264     | 149 (56)               |
| <b>Eack, 2006<sup>10</sup></b>          | USA          | Women seeking psychiatric services for their children at two mental health centers       | SCID                 | DSM-IV                | 49      | 13 (27)                |
| <b>Fiest, 2014<sup>11</sup></b>         | Canada       | Epilepsy outpatients                                                                     | SCID                 | DSM-IV                | 183     | 26 (14)                |
| <b>Fischer, 2014<sup>12</sup></b>       | Germany      | Heart failure patients                                                                   | SCID                 | DSM-IV                | 194     | 11 (6)                 |
| <b>Gjerdingen, 2009<sup>13</sup></b>    | USA          | Mothers registering their newborns for well-child visits at medical or pediatric clinics | SCID                 | DSM-IV                | 428     | 19 (4)                 |
| <b>Gräfe, 2004<sup>14</sup></b>         | Germany      | Medical and psychosomatic outpatients                                                    | SCID                 | DSM-IV                | 518     | 71 (14)                |
| <b>Green, 2017<sup>15</sup></b>         | USA          | Returning veterans                                                                       | SCID                 | DSM-V                 | 184     | 23 (13)                |
| <b>Green, 2018<sup>16</sup></b>         | Kenya        | Pregnant women and new mothers                                                           | SCID                 | DSM-V                 | 192     | 10 (5)                 |
| <b>Haroz, 2017<sup>17</sup></b>         | Myanmar      | Primary care patients                                                                    | SCID                 | DSM-IV                | 134     | 29 (22)                |
| <b>Hitchon, 2019<sup>18a</sup></b>      | Canada       | Rheumatoid arthritis patients                                                            | SCID                 | DSM-IV                | 152     | 17 (11)                |
| <b>Khamsch, 2011<sup>19</sup></b>       | Iran         | Type 2 diabetes patients                                                                 | SCID                 | DSM-IV                | 122     | 47 (39)                |
| <b>Kwan, 2012<sup>20</sup></b>          | Singapore    | Post-stroke inpatients undergoing rehabilitation                                         | SCID                 | DSM-IV-TR             | 114     | 3 (3)                  |
| <b>Lambert, 2015<sup>21</sup></b>       | Australia    | Cancer patients                                                                          | SCID                 | DSM-IV                | 161     | 24 (15)                |
| <b>Lara, 2015<sup>22</sup></b>          | Mexico       | Pregnant women during the third trimester of pregnancy                                   | SCID                 | DSM-IV                | 280     | 29 (10)                |
| <b>Lino, 2014<sup>23</sup></b>          | Brazil       | Elderly primary care patients                                                            | SCID                 | DSM-IV                | 130     | 31 (24)                |
| <b>Liu, 2011<sup>24</sup></b>           | Taiwan       | Primary care patients                                                                    | SCAN                 | DSM-IV                | 1532    | 50 (3)                 |
| <b>Marrie, 2018<sup>25</sup></b>        | Canada       | Multiple sclerosis patients                                                              | SCID                 | DSM-IV                | 249     | 25 (10)                |
| <b>Martin-Subero, 2017<sup>26</sup></b> | Spain        | Medical inpatients                                                                       | SCID                 | DSM-III               | 1003    | 83 (8)                 |
| <b>McGuire, 2013<sup>27</sup></b>       | USA          | Acute coronary syndrome inpatients                                                       | DISH                 | DSM-IV                | 100     | 9 (9)                  |
| <b>Osório, 2009<sup>28</sup></b>        | Brazil       | Women in primary care                                                                    | SCID                 | DSM-IV                | 177     | 60 (34)                |
| <b>Osório, 2012<sup>29</sup></b>        | Brazil       | Inpatients from various clinical wards                                                   | SCID                 | DSM-IV                | 86      | 28 (33)                |

|                                        |                 |                                                                           |      |        |     |         |
|----------------------------------------|-----------------|---------------------------------------------------------------------------|------|--------|-----|---------|
| <b>Osório, 2015<sup>30</sup></b>       | Brazil          | Cancer patients                                                           | SCID | DSM-IV | 399 | 64 (16) |
| <b>Patten, 2015<sup>31</sup></b>       | Canada          | Multiple sclerosis patients                                               | SCID | DSM-IV | 147 | 20 (14) |
| <b>Picardi, 2005<sup>32</sup></b>      | Italy           | Inpatients with skin diseases                                             | SCID | DSM-IV | 140 | 12 (9)  |
| <b>Prisnie, 2016<sup>33</sup></b>      | Canada          | Stroke and transient ischemic attack patients                             | SCID | DSM-IV | 119 | 12 (10) |
| <b>Quinn, Unpublished<sup>a</sup></b>  | UK              | Stroke patients                                                           | SCID | DSM-V  | 141 | 17 (12) |
| <b>Richardson, 2010<sup>34</sup></b>   | USA             | Older adults undergoing in-home aging services care management assessment | SCID | DSM-IV | 377 | 95 (25) |
| <b>Roch, 2016<sup>35</sup></b>         | Germany         | Inpatient Orthopedic Rehabilitation population                            | SCID | DSM-IV | 42  | 8 (19)  |
| <b>Rooney, 2013<sup>36</sup></b>       | UK              | Patients with cerebral glioma                                             | SCID | DSM-IV | 128 | 15 (12) |
| <b>Shinn, 2017<sup>37</sup></b>        | USA             | Cancer patients                                                           | SCID | DSM-IV | 131 | 6 (5)   |
| <b>Sidebottom, 2012<sup>38</sup></b>   | USA             | Pregnant women                                                            | SCID | DSM-IV | 248 | 12 (5)  |
| <b>Simning, 2012<sup>39</sup></b>      | USA             | Older adults living in public housing                                     | SCID | DSM-IV | 190 | 10 (5)  |
| <b>Spangenberg, 2015<sup>40</sup></b>  | Germany         | Primary care patients                                                     | SCID | DSM-IV | 161 | 1 (1)   |
| <b>Swartz, 2017<sup>41</sup></b>       | Canada          | Stroke prevention outpatients                                             | SCID | DSM-IV | 379 | 52 (14) |
| <b>Turner, 2012<sup>42</sup></b>       | Australia       | Stroke patients                                                           | SCID | DSM-IV | 72  | 13 (18) |
| <b>Turner, Unpublished<sup>a</sup></b> | Australia       | Cardiac rehabilitation patients                                           | SCID | DSM-IV | 52  | 4 (8)   |
| <b>Twist, 2013<sup>43</sup></b>        | UK              | Type 2 diabetes outpatients                                               | SCAN | DSM-IV | 358 | 79 (22) |
| <b>Wagner, 2017<sup>44</sup></b>       | USA             | Patients starting radiotherapy for the first diagnosis of any tumor       | SCID | DSM-IV | 54  | 6 (11)  |
| <b>Williams, 2012<sup>45</sup></b>     | USA             | Parkinson's Disease patients                                              | SCID | DSM-IV | 241 | 65 (27) |
| <b>Wittkamp, 2009<sup>46</sup></b>     | The Netherlands | Primary care patients at risk for depression                              | SCID | DSM-IV | 261 | 45 (17) |

#### Fully structured Interviews

|                                             |                 |                                                                |       |        |      |          |
|---------------------------------------------|-----------------|----------------------------------------------------------------|-------|--------|------|----------|
| <b>Arroll, 2010<sup>47</sup></b>            | New Zealand     | Primary care patients                                          | CIDI  | DSM-IV | 2571 | 160 (6)  |
| <b>Azah, 2005<sup>48</sup></b>              | Malaysia        | Adults attending family medicine clinics                       | CIDI  | ICD-10 | 180  | 30 (17)  |
| <b>de Man-van Ginkel, 2012<sup>49</sup></b> | The Netherlands | Stroke patients                                                | CIDI  | DSM-IV | 382  | 54 (14)  |
| <b>Delgadillo, 2011<sup>50</sup></b>        | UK              | Injecting drug users                                           | CIS-R | ICD-10 | 103  | 51 (50)  |
| <b>Fisher, 2016<sup>51</sup></b>            | Australia       | Primiparous women less than 6 weeks postpartum                 | CIDI  | DSM-IV | 357  | 4 (1)    |
| <b>Gelaye, 2014<sup>52</sup></b>            | Ethiopia        | Outpatients at a general hospital                              | CIDI  | DSM-IV | 923  | 162 (18) |
| <b>Grool, 2011<sup>53</sup></b>             | The Netherlands | Non-demented patients with symptomatic atherosclerotic disease | CIDI  | DSM-IV | 477  | 22 (5)   |
| <b>Hahn, 2006<sup>54</sup></b>              | Germany         | Patients with chronic illnesses from rehabilitation centers    | CIDI  | DSM-IV | 211  | 18 (9)   |
| <b>Henkel, 2004<sup>55</sup></b>            | Germany         | Primary care patients                                          | CIDI  | ICD-10 | 430  | 43 (10)  |
| <b>Hobfoll, 2011<sup>56</sup></b>           | Israel          | Jewish and Palestinian residents of Jerusalem exposed to war   | CIDI  | DSM-IV | 147  | 43 (29)  |
| <b>Kiely, 2014<sup>57</sup></b>             | Australia       | Community sample of adults                                     | CIDI  | ICD-10 | 823  | 33 (4)   |

|                                       |                 |                                          |       |        |      |          |
|---------------------------------------|-----------------|------------------------------------------|-------|--------|------|----------|
| <b>Kim, 2017</b> <sup>58</sup>        | South Korea     | Randomly selected adults                 | CIDI  | DSM-IV | 3076 | 206 (7)  |
| <b>Kohrt, 2016</b> <sup>59</sup>      | Nepal           | Primary care patients                    | CIDI  | DSM-IV | 125  | 17 (14)  |
| <b>Liu, 2015</b> <sup>60</sup>        | Canada          | Working population                       | CIDI  | DSM-IV | 4270 | 96 (2)   |
| <b>Mohd Sidik, 2012</b> <sup>61</sup> | Malaysia        | Primary care patients                    | CIDI  | DSM-IV | 146  | 31 (21)  |
| <b>Patel, 2008</b> <sup>62</sup>      | India           | Primary care patients                    | CIS-R | ICD-10 | 299  | 13 (4)   |
| <b>Pence, 2012</b> <sup>63</sup>      | Cameroon        | HIV-infected patients                    | CIDI  | DSM-IV | 398  | 11 (3)   |
| <b>Razykov, 2013</b> <sup>64</sup>    | Canada          | Patients with systemic sclerosis         | CIDI  | DSM-IV | 345  | 13 (4)   |
| <b>Thombs, 2008</b> <sup>65</sup>     | USA             | Outpatients with coronary artery disease | C-DIS | DSM-IV | 1018 | 223 (22) |
| <b>Zuithoff, 2009</b> <sup>66</sup>   | The Netherlands | General practice patients                | CIDI  | DSM-IV | 1038 | 135 (13) |

### Mini International Neuropsychiatric Interviews (MINI)

|                                            |                 |                                                                                               |      |           |      |         |
|--------------------------------------------|-----------------|-----------------------------------------------------------------------------------------------|------|-----------|------|---------|
| <b>Akena, 2013</b> <sup>67</sup>           | Uganda          | HIV/AIDS patients                                                                             | MINI | DSM-IV    | 92   | 11 (12) |
| <b>Baron, 2017</b> <sup>68</sup>           | South Africa    | Xhosa, Afrikaans and Zulu-speaking general population                                         | MINI | DSM-IV    | 856  | 93 (11) |
| <b>Buji, 2018</b> <sup>69</sup>            | Malaysia        | Patients with systemic lupus erythematosus                                                    | MINI | DSM-IV    | 130  | 5 (4)   |
| <b>Cholera, 2014</b> <sup>70</sup>         | South Africa    | Patients undergoing routine HIV counseling and testing at a primary health care clinic        | MINI | DSM-IV    | 397  | 47 (12) |
| <b>Conway, 2016</b> <sup>71</sup>          | Australia       | Heart transplant recipients                                                                   | MINI | DSM-IV    | 26   | 2 (8)   |
| <b>de la Torre, 2016</b> <sup>72</sup>     | Argentina       | Hospitalized general medical patients                                                         | MINI | DSM-IV    | 257  | 69 (27) |
| <b>Garabiles, Unpublished</b> <sup>a</sup> | China           | Female Filipino domestic workers in Macao                                                     | MINI | DSM-IV    | 99   | 39 (39) |
| <b>Gholizadeh, 2019</b> <sup>73a</sup>     | Iran            | Coronary artery disease patients                                                              | MINI | DSM-IV    | 87   | 15 (17) |
| <b>Hantsoo, 2017</b> <sup>74</sup>         | USA             | General population                                                                            | MINI | DSM-IV    | 322  | 19 (6)  |
| <b>Hides, 2007</b> <sup>75</sup>           | Australia       | Injection drug users accessing a needle and syringe program                                   | MINI | DSM-IV    | 103  | 47 (46) |
| <b>Hyphantis, 2011</b> <sup>76</sup>       | Greece          | Patients with various rheumatologic disorders                                                 | MINI | DSM-IV    | 213  | 69 (32) |
| <b>Hyphantis, 2014</b> <sup>77</sup>       | Greece          | Patients with chronic illnesses presenting at the emergency department                        | MINI | DSM-IV    | 349  | 95 (27) |
| <b>Inagaki, 2013</b> <sup>78</sup>         | Japan           | Internal medicine outpatients                                                                 | MINI | DSM-III-R | 104  | 21 (20) |
| <b>Janssen, 2016</b> <sup>79</sup>         | The Netherlands | General population and Type 2 diabetes patients                                               | MINI | DSM-IV    | 4710 | 156 (3) |
| <b>Lamers, 2008</b> <sup>80</sup>          | The Netherlands | Elderly primary care patients with diabetes mellitus or chronic obstructive pulmonary disease | MINI | DSM-IV    | 115  | 65 (57) |
| <b>Levin-Aspenson, 2017</b> <sup>81</sup>  | USA             | General population                                                                            | MINI | DSM-V     | 408  | 66 (16) |
| <b>Liu, 2016</b> <sup>82</sup>             | China           | Primary care patients                                                                         | MINI | DSM-IV    | 1997 | 97 (5)  |
| <b>Lotrakul, 2008</b> <sup>83</sup>        | Thailand        | Outpatients                                                                                   | MINI | DSM-IV    | 278  | 19 (7)  |
| <b>Muramatsu, 2007</b> <sup>84</sup>       | Japan           | Primary care patients                                                                         | MINI | DSM-IV    | 122  | 36 (30) |
| <b>Muramatsu, 2018</b> <sup>85</sup>       | Japan           | Primary care patients                                                                         | MINI | DSM-IV    | 163  | 50 (31) |
| <b>Nakku, 2016</b> <sup>86</sup>           | Uganda          | Primary patients and hospital outpatients                                                     | MINI | DSM-IV    | 153  | 84 (55) |

|                                          |                 |                                                                     |      |        |      |          |
|------------------------------------------|-----------------|---------------------------------------------------------------------|------|--------|------|----------|
| <b>Paika, 2017</b> <sup>87</sup>         | Greece          | Patients with long term medical conditions                          | MINI | DSM-IV | 474  | 98 (21)  |
| <b>Park, 2013</b> <sup>88</sup>          | South Korea     | Cancer patients                                                     | MINI | DSM-IV | 354  | 52 (15)  |
| <b>Persoons, 2001</b> <sup>89</sup>      | Belgium         | Inpatients and patients at gastroenterological and hepatology wards | MINI | DSM-IV | 179  | 30 (17)  |
| <b>Rancans, 2018</b> <sup>90</sup>       | Latvia          | Primary care patients                                               | MINI | DSM-IV | 1467 | 147 (10) |
| <b>Santos, 2013</b> <sup>91</sup>        | Brazil          | General population                                                  | MINI | DSM-IV | 196  | 25 (13)  |
| <b>Stafford, 2007</b> <sup>92</sup>      | Australia       | Inpatients with coronary artery disease who had undergone surgery   | MINI | DSM-IV | 193  | 35 (18)  |
| <b>Sung, 2013</b> <sup>93</sup>          | Singapore       | Primary care patients                                               | MINI | DSM-IV | 400  | 12 (3)   |
| <b>Suzuki, 2015</b> <sup>94</sup>        | Japan           | Outpatients in general medicine department                          | MINI | DSM-IV | 512  | 42 (8)   |
| <b>van Heyningen, 2018</b> <sup>95</sup> | South Africa    | Pregnant women                                                      | MINI | DSM-IV | 374  | 81 (22)  |
| <b>Volker, 2016</b> <sup>96</sup>        | The Netherlands | Employees on sickness leave                                         | MINI | DSM-IV | 98   | 25 (26)  |
| <b>Zhang, 2013</b> <sup>97</sup>         | China           | Type 2 diabetes patients                                            | MINI | DSM-IV | 68   | 17 (25)  |

**Abbreviations:** C-DIS: Computerized Diagnostic Interview Schedule; CIDI: Composite International Diagnostic Interview; CIS-R: Clinical Interview Schedule Revised; DISH: Depression Interview and Structured Hamilton; DSM: Diagnostic and Statistical Manual of Mental Disorders; ICD: International Classification of Diseases; MINI: Mini Neurosychiatric Diagnostic Interview; SCAN: Schedules for Clinical Assessment in Neuropsychiatry; SCID: Structured Clinical Interview for DSM Disorders; UK: United Kingdom; USA: United States of America.

<sup>a</sup>Was unpublished at the time of electronic database search

**eTable 1b. Characteristics of eligible primary studies not included in the present study**

| First Author, Year                  | Country      | Recruited Population                                             | Diagnostic Interview | Classification System | Total N | Major Depression N (%) | Could study have been added as a published dataset? (Reason)            |
|-------------------------------------|--------------|------------------------------------------------------------------|----------------------|-----------------------|---------|------------------------|-------------------------------------------------------------------------|
| <b>Semi-structured Interviews</b>   |              |                                                                  |                      |                       |         |                        |                                                                         |
| <b>Alamri, 2017</b> <sup>98</sup>   | Saudi Arabia | Hospitalized elderly in medical and surgical wards               | SCID                 | DSM-IV                | 199     | 24 (12)                | No (Primary study did not report accuracy results for any PHQ-2 cutoff) |
| <b>Bailer, 2016</b> <sup>99</sup>   | Germany      | Healthy participants and cognitive behaviour therapy outpatients | SCID                 | DSM-IV                | 200     | 68 (34)                | No (Primary study did not report accuracy results for any PHQ-2 cutoff) |
| <b>Becker, 2002</b> <sup>100</sup>  | Saudi Arabia | Primary care patients                                            | SCID                 | DSM-III-R             | 173     | NR                     | No (Primary study did not report accuracy results for any PHQ-2 cutoff) |
| <b>Brodey, 2016</b> <sup>101</sup>  | USA          | Perinatal women                                                  | SCID                 | DSM-IV                | 879     | NR                     | No (Primary study did not report accuracy results for any PHQ-2 cutoff) |
| <b>Chen, 2013</b> <sup>102</sup>    | China        | Primary care populations                                         | SCID                 | DSM-IV                | 280     | NR                     | No (Primary study did not report accuracy results for any PHQ-2 cutoff) |
| <b>Chen, 2012</b> <sup>103</sup>    | China        | Adults over 60 in primary care                                   | SCID                 | DSM-IV                | 262     | 97 (37)                | No (Primary study did not report accuracy results for any PHQ-2 cutoff) |
| <b>Fann, 2005</b> <sup>104</sup>    | USA          | Inpatients with traumatic brain injury                           | SCID                 | DSM-IV                | 135     | 45 (34)                | No (Primary study did not report accuracy results for any PHQ-2 cutoff) |
| <b>Fisher, 2016</b> <sup>105</sup>  | USA, Canada  | Type 1 diabetes patients                                         | SCID                 | DSM-V                 | 368     | 13 (4)                 | No (Primary study did not report accuracy results for any PHQ-2 cutoff) |
| <b>Irmak, 2017</b> <sup>106</sup>   | Turkey       | Battered women                                                   | SCID                 | DSM-V                 | 150     | 63 (42)                | No (Primary study did not report accuracy results for any PHQ-2 cutoff) |
| <b>Lai, 2010</b> <sup>107</sup>     | China        | Men with postpartum wives                                        | SCID                 | DSM-IV                | 551     | 8 (1)                  | No (Primary study did not report accuracy results for any PHQ-2 cutoff) |
| <b>Limon, 2016</b> <sup>108</sup>   | USA          | Latino farmworkers                                               | SCID                 | DSM-IV                | 99      | NR                     | No (Primary study did not report accuracy results for any PHQ-2 cutoff) |
| <b>Liu, 2016</b> <sup>109</sup>     | China        | Rural elderly population                                         | SCID                 | DSM-IV                | 839     | 57 (7)                 | Yes (Published accuracy results for PHQ-2 cutoffs 1-4)                  |
| <b>Nacak, 2017</b> <sup>110</sup>   | Germany      | Patients with somatoform pain disorder                           | SCID                 | DSM-IV                | 130     | 36 (28)                | No (Primary study did not report accuracy results for any PHQ-2 cutoff) |
| <b>Navinés, 2012</b> <sup>111</sup> | Spain        | Chronic hepatitis C patients                                     | SCID                 | DSM-IV                | 500     | 32 (6)                 | No (Primary study did not report accuracy results for any PHQ-2 cutoff) |
| <b>Phelan, 2010</b> <sup>112</sup>  | USA          | Elderly primary care patients                                    | SCID                 | DSM-IV                | 69      | 8 (12)                 | Yes (Published accuracy results for PHQ-2 cutoffs 1-5)                  |



|                                                              |           |                                 |       |                   |      |         |                                                                                                                              |
|--------------------------------------------------------------|-----------|---------------------------------|-------|-------------------|------|---------|------------------------------------------------------------------------------------------------------------------------------|
| <b>Thompson, 2011</b> <sup>113</sup>                         | USA       | Parkinson's patients            | SCID  | DSM-IV            | 214  | 30 (14) | No (Primary study did not report accuracy results for any PHQ-2 cutoff)                                                      |
| <b>Vöhringer, 2013</b> <sup>114</sup>                        | Chile     | Primary care patients           | SCID  | DSM-IV            | 190  | 59 (31) | No (Primary study did not report accuracy results for any PHQ-2 cutoff)                                                      |
| <b>Watnick, 2005</b> <sup>115</sup>                          | USA       | Long term dialysis patients     | SCID  | DSM-IV            | 62   | 12 (19) | No (Primary study did not report accuracy results for any PHQ-2 cutoff)                                                      |
| <b>Fully Structured Interviews</b>                           |           |                                 |       |                   |      |         |                                                                                                                              |
| <b>Al-Ghafri, 2014</b> <sup>116</sup>                        | Oman      | Medical trainees                | CIDI  | NR                | 131  | NR      | No (Primary study did not report accuracy results for any PHQ-2 cutoff)                                                      |
| <b>Haddad, 2013</b> <sup>117</sup>                           | UK        | Coronary heart disease patients | CIS-R | ICD-10            | 730  | 32 (4)  | No (Primary study did not report accuracy results for any PHQ-2 cutoff)                                                      |
| <b>Ikin, 2016</b> <sup>118</sup>                             | Australia | Veterans of the Gulf War        | CIDI  | DSM-IV            | 1356 | NR      | No (Primary study did not report accuracy results for any PHQ-2 cutoff)                                                      |
| <b>Smith, 2010</b> <sup>119</sup>                            | USA       | Pregnant women                  | CIDI  | DSM-IV            | 213  | 13 (6)  | No (Published data ineligible; some participants had time intervals between PHQ-2 and CIDI that were greater than 2 weeks).  |
| <b>Valencia-Garcia, 2017</b> <sup>120</sup>                  | USA       | Mexican American women          | CIDI  | DSM-IV            | 205  | 40 (20) | No (Primary study did not report accuracy results for any PHQ-2 cutoff)                                                      |
| <b>Wang, 2015</b> <sup>121</sup>                             | China     | Cardiovascular outpatients      | CIDI  | DSM-IV            | 201  | 42 (21) | Yes (Published accuracy results for PHQ-2 cutoffs 1-5)                                                                       |
| <b>Mini International Neuropsychiatric Interviews (MINI)</b> |           |                                 |       |                   |      |         |                                                                                                                              |
| <b>Choi, 2015</b> <sup>122</sup>                             | Canada    | HIV patients                    | MINI  | DSM-IV            | 190  | 29 (15) | Yes (Published accuracy results for PHQ-2 cutoffs 2-4)                                                                       |
| <b>Du, 2017</b> <sup>123</sup>                               | China     | University students             | MINI  | DSM-IV            | 81   | 9 (11)  | No (Primary study did not report accuracy results for any PHQ-2 cutoff)                                                      |
| <b>Griffith, 2015</b> <sup>124</sup>                         | USA       | Patients with epilepsy          | MINI  | DSM-IV and ICD-10 | 114  | 20 (18) | No (Primary study did not report accuracy results for any PHQ-2 cutoff)                                                      |
| <b>Margrove, 2011</b> <sup>125</sup>                         | UK        | Patients with epilepsy          | MINI  | DSM-IV and ICD-10 | 52   | 25 (48) | No (Published accuracy results for PHQ-2 cutoff 3, but results would need to be weighted by inverse selection probabilities) |
| <b>Persoons, 2003</b> <sup>126</sup>                         | Belgium   | Otorhinolaryngology outpatients | MINI  | DSM-IV            | 97   | 16 (16) | No (Primary study did not report accuracy results for any PHQ-2 cutoff)                                                      |
| <b>Rathore, 2014</b> <sup>127</sup>                          | USA       | Patients with epilepsy          | MINI  | DSM-IV            | 158  | 36 (23) | Yes (Published accuracy results for PHQ-2 cutoffs 1-3)                                                                       |
| <b>Scott, 2011</b> <sup>128</sup>                            | USA       | Chronic hepatitis C patients    | MINI  | DSM-IV and ICD-10 | 30   | NR      | No (Primary study did not report accuracy results for any PHQ-2 cutoff)                                                      |

|                                                         |                 |                                            |      |        |      |          |                                                                         |
|---------------------------------------------------------|-----------------|--------------------------------------------|------|--------|------|----------|-------------------------------------------------------------------------|
| <b>Seo, 2015</b> <sup>129</sup>                         | South Korea     | Migrane patients                           | MINI | DSM-IV | 132  | 39 (30)  | Yes (Published accuracy results for PHQ-2 cutoffs 2-4)                  |
| <b>van Steenbergen-Weijnenburg, 2010</b> <sup>130</sup> | The Netherlands | Diabetes patients                          | MINI | DSM-IV | 197  | 37 (19)  | No (Primary study did not report accuracy results for any PHQ-2 cutoff) |
| <b>Wang, 2014</b> <sup>131</sup>                        | China           | General population                         | MINI | DSM-IV | 1045 | 28 (3)   | No (Primary study did not report accuracy results for any PHQ-2 cutoff) |
| <b>Woldetensay, 2018</b> <sup>132</sup>                 | Ethiopia        | Pregnant women                             | MINI | DSM-IV | 216  | 28 (13)  | No (Primary study did not report accuracy results for any PHQ-2 cutoff) |
| <b>Xiong, 2014</b> <sup>133</sup>                       | China           | Outpatients with multiple somatic symptoms | MINI | DSM-IV | 398  | 116 (29) | Yes (Published accuracy results for PHQ-2 cutoff 3)                     |

**Abbreviations:** CIDI: Composite International Diagnostic Interview; CIS-R: Clinical Interview Schedule Revised; DSM: Diagnostic and Statistical Manual of Mental Disorders; ICD: International Classification of Diseases; MINI: Mini International Neuropsychiatric Interview; NR: Not Reported; SCID: Structured Clinical Interview for DSM Disorders; UK: United Kingdom; USA: United States of America.

**eTable 2. Numbers of participants and cases of major depression by diagnostic interview**

| Diagnostic Interview    | N Studies  | N Participants | Major Depression |           |
|-------------------------|------------|----------------|------------------|-----------|
|                         |            |                | N                | %         |
| <b>Semi-structured</b>  |            |                |                  |           |
| SCID                    | 45         | 9,713          | 1,400            | 14        |
| SCAN                    | 2          | 1,890          | 129              | 7         |
| DISH                    | 1          | 100            | 9                | 9         |
| <b>Fully structured</b> |            |                |                  |           |
| CIDI                    | 17         | 15,899         | 1,078            | 7         |
| DIS                     | 1          | 1,018          | 223              | 22        |
| CIS-R                   | 2          | 402            | 64               | 16        |
| MINI                    | 32         | 15,296         | 1,669            | 11        |
| <b>Total</b>            | <b>100</b> | <b>44,318</b>  | <b>4,572</b>     | <b>10</b> |

**eTable 3a. Estimates of heterogeneity at PHQ-2 cutoff score of 2**

| Participant Subgroup                                                                                          | Semi-structured Diagnostic Interviews |             |                |             | Fully Structured Diagnostic Interviews |             |                |             | Mini International Neuropsychiatric Interviews |             |                |             |
|---------------------------------------------------------------------------------------------------------------|---------------------------------------|-------------|----------------|-------------|----------------------------------------|-------------|----------------|-------------|------------------------------------------------|-------------|----------------|-------------|
|                                                                                                               | R <sup>a</sup>                        |             | τ <sup>2</sup> |             | R <sup>a</sup>                         |             | τ <sup>2</sup> |             | R <sup>a</sup>                                 |             | τ <sup>2</sup> |             |
|                                                                                                               | Sensitivity                           | Specificity | Sensitivity    | Specificity | Sensitivity                            | Specificity | Sensitivity    | Specificity | Sensitivity                                    | Specificity | Sensitivity    | Specificity |
| <b>All participants</b>                                                                                       | 2.72                                  | 3.83        | 1.29           | 0.27        | 3.28                                   | 9.30        | 0.64           | 0.61        | 3.11                                           | 5.37        | 1.06           | 0.31        |
| <b>Participants verified to not currently be diagnosed or receiving treatment for a mental health problem</b> | 2.05                                  | 3.53        | 1.09           | 0.43        | 3.24                                   | 9.06        | 0.96           | 0.63        | 2.16                                           | 5.31        | 0.48           | 0.29        |
| <b>Age &lt; 60</b>                                                                                            | 2.62                                  | 3.20        | 1.39           | 0.23        | 3.23                                   | 8.35        | 0.76           | 0.60        | 2.48                                           | 4.52        | 0.90           | 0.27        |
| <b>Age ≥ 60</b>                                                                                               | 2.20                                  | 2.34        | 1.06           | 0.20        | 1.92                                   | 4.75        | 0.43           | 0.58        | 2.10                                           | 3.24        | 0.66           | 0.25        |
| <b>Women</b>                                                                                                  | 2.68                                  | 3.17        | 1.43           | 0.26        | 2.75                                   | 7.59        | 0.65           | 0.68        | 2.54                                           | 5.53        | 0.80           | 0.50        |
| <b>Men</b>                                                                                                    | 1.66                                  | 2.65        | 0.74           | 0.26        | 2.38                                   | 5.96        | 0.60           | 0.52        | 2.82                                           | 3.94        | 2.18           | 0.36        |
| <b>Very high country human development index</b>                                                              | 1.99                                  | 3.47        | 0.95           | 0.21        | 3.42                                   | 9.83        | 0.65           | 0.63        | 2.59                                           | 5.36        | 0.76           | 0.32        |
| <b>High country human development index</b>                                                                   | 3.86                                  | 3.60        | 1.61           | 0.28        | --                                     | --          | --             | --          | 2.61                                           | 3.26        | 0.75           | 0.08        |
| <b>Low-medium country human development index</b>                                                             | 2.56                                  | 3.92        | 0.37           | 0.46        | 2.41                                   | 6.47        | 0.55           | 0.46        | 9.11                                           | 4.75        | 4.06           | 1.26        |
| <b>Non-medical care</b>                                                                                       | 1.71                                  | 2.86        | 0.48           | 0.13        | 3.38                                   | 5.91        | 0.39           | 0.11        | 2.74                                           | 6.56        | 0.63           | 0.33        |
| <b>Primary care</b>                                                                                           | 4.82                                  | 5.26        | 3.00           | 0.44        | 2.44                                   | 5.38        | 0.40           | 0.22        | 5.01                                           | 6.36        | 2.27           | 0.31        |
| <b>Inpatient specialty care</b>                                                                               | 2.19                                  | 1.88        | 1.75           | 0.04        | 2.59                                   | 7.48        | 0.65           | 0.92        | 1.49                                           | 1.00        | 0.30           | 0.00        |
| <b>Outpatient specialty care</b>                                                                              | 2.01                                  | 3.49        | 0.56           | 0.28        | 2.05                                   | 9.82        | 0.25           | 1.07        | 1.92                                           | 3.30        | 0.46           | 0.22        |

<sup>a</sup>R is the ratio of the estimated standard deviation of the pooled sensitivity (or specificity) from the random-effects model to the estimated standard deviation of the pooled sensitivity (or specificity) from the corresponding fixed-effects model

**eTable 3b. Estimates of heterogeneity at PHQ-2 cutoff score of 3**

| Participant Subgroup                                                                                          | Semi-structured Diagnostic Interviews |             |                |             | Fully Structured Diagnostic Interviews |             |                |             | Mini International Neuropsychiatric Interviews |             |                |             |
|---------------------------------------------------------------------------------------------------------------|---------------------------------------|-------------|----------------|-------------|----------------------------------------|-------------|----------------|-------------|------------------------------------------------|-------------|----------------|-------------|
|                                                                                                               | R <sup>a</sup>                        |             | τ <sup>2</sup> |             | R <sup>a</sup>                         |             | τ <sup>2</sup> |             | R <sup>a</sup>                                 |             | τ <sup>2</sup> |             |
|                                                                                                               | Sensitivity                           | Specificity | Sensitivity    | Specificity | Sensitivity                            | Specificity | Sensitivity    | Specificity | Sensitivity                                    | Specificity | Sensitivity    | Specificity |
| <b>All participants</b>                                                                                       | 2.22                                  | 3.47        | 0.47           | 0.33        | 3.50                                   | 7.00        | 0.59           | 0.78        | 2.94                                           | 4.13        | 0.56           | 0.40        |
| <b>Participants verified to not currently be diagnosed or receiving treatment for a mental health problem</b> | 2.37                                  | 3.11        | 0.73           | 0.58        | 2.48                                   | 5.12        | 0.32           | 0.48        | 2.37                                           | 4.4         | 0.41           | 0.54        |
| <b>Age &lt; 60</b>                                                                                            | 2.10                                  | 3.02        | 0.48           | 0.29        | 3.08                                   | 6.75        | 0.55           | 0.88        | 2.55                                           | 3.60        | 0.55           | 0.37        |
| <b>Age ≥ 60</b>                                                                                               | 2.23                                  | 2.20        | 0.95           | 0.24        | 2.66                                   | 3.81        | 0.92           | 0.81        | 2.32                                           | 2.83        | 0.52           | 0.49        |
| <b>Women</b>                                                                                                  | 2.34                                  | 3.18        | 0.74           | 0.39        | 2.79                                   | 5.87        | 0.56           | 0.91        | 2.66                                           | 4.49        | 0.58           | 0.74        |
| <b>Men</b>                                                                                                    | 1.35                                  | 2.07        | 0.18           | 0.2         | 2.46                                   | 4.63        | 0.52           | 0.7         | 2.13                                           | 2.87        | 0.71           | 0.41        |
| <b>Very high country human development index</b>                                                              | 1.74                                  | 3.09        | 0.28           | 0.24        | 3.54                                   | 6.88        | 0.59           | 0.77        | 2.68                                           | 4.07        | 0.44           | 0.44        |
| <b>High country human development index</b>                                                                   | 3.68                                  | 2.56        | 1.19           | 0.19        | --                                     | --          | --             | --          | 1.97                                           | 3.22        | 0.21           | 0.15        |
| <b>Low-medium country human development index</b>                                                             | 2.56                                  | 3.92        | 0.37           | 0.46        | 3.98                                   | 4.12        | 0.93           | 0.25        | 5.60                                           | 3.34        | 2.42           | 0.81        |
| <b>Non-medical care</b>                                                                                       | 1.56                                  | 2.25        | 0.05           | 0.11        | 2.01                                   | 6.49        | 0.13           | 0.44        | 2.84                                           | 5.83        | 0.45           | 0.87        |
| <b>Primary care</b>                                                                                           | 3.22                                  | 4.39        | 0.82           | 0.44        | 2.73                                   | 4.89        | 0.34           | 0.38        | 3.78                                           | 4.26        | 0.84           | 0.28        |
| <b>Inpatient specialty care</b>                                                                               | 1.76                                  | 1.12        | 0.48           | 0.00        | 1.67                                   | 4.81        | 0.15           | 0.54        | 1.22                                           | 1.00        | 0.05           | 0.00        |
| <b>Outpatient specialty care</b>                                                                              | 1.74                                  | 3.30        | 0.27           | 0.41        | 3.08                                   | 7.39        | 0.46           | 1.07        | 2.40                                           | 2.45        | 0.44           | 0.18        |

<sup>a</sup>R is the ratio of the estimated standard deviation of the pooled sensitivity (or specificity) from the random-effects model to the estimated standard deviation of the pooled sensitivity (or specificity) from the corresponding fixed-effects model

**eTable 4a. Comparison of PHQ-2 sensitivity and specificity estimates at cutoff 2 among all participants, among participants not currently diagnosed or receiving treatment for a mental health problem, and among participant subgroups based on age, sex, human development index, and care setting**

| Participant Subgroup                                                                                          | Semi-structured Diagnostic Interviews |              |             |              | Fully Structured Diagnostic Interviews |              |             |              | Mini International Neuropsychiatric Interviews |              |             |              |
|---------------------------------------------------------------------------------------------------------------|---------------------------------------|--------------|-------------|--------------|----------------------------------------|--------------|-------------|--------------|------------------------------------------------|--------------|-------------|--------------|
|                                                                                                               | Sensitivity                           |              | Specificity |              | Sensitivity                            |              | Specificity |              | Sensitivity                                    |              | Specificity |              |
|                                                                                                               | Estimate                              | 95% CI       | Estimate    | 95% CI       | Estimate                               | 95% CI       | Estimate    | 95% CI       | Estimate                                       | 95% CI       | Estimate    | 95% CI       |
| <b>All participants</b>                                                                                       | 0.91                                  | (0.88, 0.94) | 0.67        | (0.64, 0.71) | 0.82                                   | (0.75, 0.87) | 0.71        | (0.63, 0.77) | 0.89                                           | (0.84, 0.92) | 0.68        | (0.64, 0.73) |
| <b>Participants verified to not currently be diagnosed or receiving treatment for a mental health problem</b> | 0.90                                  | (0.84, 0.94) | 0.73        | (0.67, 0.78) | 0.91                                   | (0.78, 0.97) | 0.71        | (0.54, 0.83) | 0.85                                           | (0.78, 0.90) | 0.74        | (0.68, 0.79) |
| <b>Age &lt; 60</b>                                                                                            | 0.93                                  | (0.89, 0.96) | 0.64        | (0.61, 0.68) | 0.82                                   | (0.74, 0.87) | 0.70        | (0.62, 0.77) | 0.89                                           | (0.85, 0.93) | 0.67        | (0.62, 0.71) |
| <b>Age ≥ 60</b>                                                                                               | 0.89                                  | (0.81, 0.93) | 0.73        | (0.69, 0.76) | 0.84                                   | (0.74, 0.90) | 0.74        | (0.65, 0.81) | 0.87                                           | (0.80, 0.92) | 0.73        | (0.68, 0.77) |
| <b>Women</b>                                                                                                  | 0.93                                  | (0.88, 0.95) | 0.65        | (0.61, 0.68) | 0.80                                   | (0.72, 0.86) | 0.68        | (0.52, 0.72) | 0.88                                           | (0.84, 0.92) | 0.64        | (0.58, 0.70) |
| <b>Men</b>                                                                                                    | 0.89                                  | (0.84, 0.93) | 0.71        | (0.67, 0.75) | 0.82                                   | (0.74, 0.88) | 0.73        | (0.65, 0.79) | 0.92                                           | (0.85, 0.96) | 0.72        | (0.67, 0.76) |
| <b>Very high country human development index</b>                                                              | 0.93                                  | (0.89, 0.95) | 0.68        | (0.65, 0.72) | 0.82                                   | (0.74, 0.88) | 0.72        | (0.63, 0.79) | 0.91                                           | (0.86, 0.94) | 0.69        | (0.64, 0.74) |
| <b>High country human development index</b>                                                                   | 0.86                                  | (0.70, 0.94) | 0.68        | (0.59, 0.76) | --                                     | --           | --          | --           | 0.84                                           | (0.73, 0.91) | 0.65        | (0.60, 0.70) |
| <b>Low-medium country human development index</b>                                                             | 0.87                                  | (0.69, 0.95) | 0.50        | (0.31, 0.69) | 0.76                                   | (0.57, 0.88) | 0.65        | (0.49, 0.79) | 0.87                                           | (0.15, 1.00) | 0.73        | (0.35, 0.93) |
| <b>Non-medical care</b>                                                                                       | 0.90                                  | (0.71, 0.97) | 0.66        | (0.53, 0.77) | 0.69                                   | (0.53, 0.82) | 0.79        | (0.73, 0.85) | 0.85                                           | (0.75, 0.92) | 0.71        | (0.62, 0.79) |
| <b>Primary care</b>                                                                                           | 0.95                                  | (0.86, 0.98) | 0.69        | (0.61, 0.76) | 0.87                                   | (0.78, 0.93) | 0.66        | (0.58, 0.74) | 0.94                                           | (0.84, 0.98) | 0.62        | (0.52, 0.70) |
| <b>Inpatient specialty care</b>                                                                               | 0.93                                  | (0.81, 0.98) | 0.62        | (0.58, 0.66) | 0.88                                   | (0.61, 0.97) | 0.62        | (0.29, 0.86) | 0.89                                           | (0.78, 0.95) | 0.69        | (0.65, 0.73) |
| <b>Outpatient specialty care</b>                                                                              | 0.89                                  | (0.83, 0.93) | 0.68        | (0.61, 0.73) | 0.81                                   | (0.72, 0.87) | 0.72        | (0.54, 0.85) | 0.87                                           | (0.80, 0.91) | 0.70        | (0.64, 0.76) |

Abbreviations: CI: confidence interval

**eTable 4b. Comparison of PHQ-2 sensitivity and specificity estimates at cutoff 3 among all participants, among participants not currently diagnosed or receiving treatment for a mental health problem, and among participant subgroups based on age, sex, human development index, and care setting**

| Participant Subgroup                                                                                          | Semi-structured Diagnostic Interviews |              |             |              | Fully Structured Diagnostic Interviews |              |             |              | Mini International Neuropsychiatric Interviews |              |             |              |
|---------------------------------------------------------------------------------------------------------------|---------------------------------------|--------------|-------------|--------------|----------------------------------------|--------------|-------------|--------------|------------------------------------------------|--------------|-------------|--------------|
|                                                                                                               | Sensitivity                           |              | Specificity |              | Sensitivity                            |              | Specificity |              | Sensitivity                                    |              | Specificity |              |
|                                                                                                               | Estimate                              | 95% CI       | Estimate    | 95% CI       | Estimate                               | 95% CI       | Estimate    | 95% CI       | Estimate                                       | 95% CI       | Estimate    | 95% CI       |
| <b>All participants</b>                                                                                       | 0.72                                  | (0.67, 0.77) | 0.85        | (0.83, 0.87) | 0.53                                   | (0.44, 0.62) | 0.89        | (0.84, 0.92) | 0.69                                           | (0.62, 0.75) | 0.87        | (0.84, 0.90) |
| <b>Participants verified to not currently be diagnosed or receiving treatment for a mental health problem</b> | 0.68                                  | (0.57, 0.77) | 0.90        | (0.86, 0.92) | 0.55                                   | (0.40, 0.68) | 0.91        | (0.83, 0.95) | 0.67                                           | (0.58, 0.75) | 0.89        | (0.85, 0.93) |
| <b>Age &lt; 60</b>                                                                                            | 0.71                                  | (0.66, 0.77) | 0.84        | (0.81, 0.86) | 0.52                                   | (0.43, 0.61) | 0.89        | (0.84, 0.93) | 0.69                                           | (0.62, 0.75) | 0.87        | (0.84, 0.89) |
| <b>Age ≥ 60</b>                                                                                               | 0.77                                  | (0.67, 0.84) | 0.88        | (0.86, 0.90) | 0.59                                   | (0.43, 0.73) | 0.88        | (0.82, 0.93) | 0.71                                           | (0.62, 0.79) | 0.87        | (0.83, 0.90) |
| <b>Women</b>                                                                                                  | 0.74                                  | (0.67, 0.80) | 0.84        | (0.81, 0.87) | 0.51                                   | (0.42, 0.61) | 0.88        | (0.78, 0.88) | 0.68                                           | (0.60, 0.74) | 0.85        | (0.81, 0.89) |
| <b>Men</b>                                                                                                    | 0.70                                  | (0.64, 0.75) | 0.87        | (0.85, 0.89) | 0.55                                   | (0.45, 0.65) | 0.89        | (0.85, 0.93) | 0.73                                           | (0.64, 0.80) | 0.88        | (0.85, 0.91) |
| <b>Very high country human development index</b>                                                              | 0.73                                  | (0.68, 0.77) | 0.87        | (0.84, 0.89) | 0.52                                   | (0.42, 0.62) | 0.91        | (0.86, 0.94) | 0.73                                           | (0.66, 0.79) | 0.87        | (0.84, 0.90) |
| <b>High country human development index</b>                                                                   | 0.73                                  | (0.55, 0.86) | 0.83        | (0.77, 0.87) | --                                     | --           | --          | --           | 0.60                                           | (0.51, 0.69) | 0.87        | (0.83, 0.90) |
| <b>Low-medium country human development index</b>                                                             | 0.63                                  | (0.44, 0.79) | 0.69        | (0.50, 0.83) | 0.61                                   | (0.34, 0.82) | 0.81        | (0.72, 0.88) | 0.62                                           | (0.13, 0.95) | 0.86        | (0.60, 0.96) |
| <b>Non-medical care</b>                                                                                       | 0.77                                  | (0.62, 0.88) | 0.83        | (0.74, 0.89) | 0.37                                   | (0.27, 0.47) | 0.94        | (0.89, 0.97) | 0.63                                           | (0.50, 0.74) | 0.90        | (0.83, 0.95) |
| <b>Primary care</b>                                                                                           | 0.75                                  | (0.64, 0.84) | 0.86        | (0.81, 0.90) | 0.67                                   | (0.54, 0.77) | 0.87        | (0.80, 0.91) | 0.67                                           | (0.52, 0.80) | 0.86        | (0.80, 0.90) |
| <b>Inpatient specialty care</b>                                                                               | 0.75                                  | (0.61, 0.84) | 0.81        | (0.79, 0.83) | 0.76                                   | (0.58, 0.88) | 0.80        | (0.58, 0.92) | 0.72                                           | (0.62, 0.80) | 0.85        | (0.81, 0.88) |
| <b>Outpatient specialty care</b>                                                                              | 0.69                                  | (0.62, 0.75) | 0.87        | (0.83, 0.90) | 0.43                                   | (0.30, 0.56) | 0.89        | (0.79, 0.95) | 0.72                                           | (0.62, 0.80) | 0.86        | (0.82, 0.89) |

Abbreviations: CI: confidence interval

**eTable 4c. Comparison of PHQ-2 sensitivity and specificity estimates among participants verified to not currently be diagnosed or receiving treatment for a mental health problem compared to all participants, among participants administered a semi-structured diagnostic interview**

| Cutoff | All participants <sup>a</sup> |              |             |              | Participants verified to not currently be diagnosed or receiving treatment for a mental health problem <sup>b</sup> |              |             |              | Difference across groups<br>(All participants – participants verified to not currently be diagnosed or receiving treatment for a mental health problem) |               |             |                |
|--------|-------------------------------|--------------|-------------|--------------|---------------------------------------------------------------------------------------------------------------------|--------------|-------------|--------------|---------------------------------------------------------------------------------------------------------------------------------------------------------|---------------|-------------|----------------|
|        | Sensitivity                   | 95% CI       | Specificity | 95% CI       | Sensitivity                                                                                                         | 95% CI       | Specificity | 95% CI       | Sensitivity                                                                                                                                             | 95% CI        | Specificity | 95% CI         |
| 2      | 0.91                          | (0.88, 0.94) | 0.67        | (0.64, 0.71) | 0.90                                                                                                                | (0.84, 0.94) | 0.73        | (0.67, 0.78) | 0.01                                                                                                                                                    | (-0.05, 0.08) | -0.06       | (-0.10, -0.02) |
| 3      | 0.72                          | (0.67, 0.77) | 0.85        | (0.83, 0.87) | 0.68                                                                                                                | (0.57, 0.77) | 0.90        | (0.86, 0.92) | 0.04                                                                                                                                                    | (-0.05, 0.16) | -0.04       | (-0.07, -0.02) |

<sup>a</sup>N Studies = 48; N Participants = 11,703; N major depression = 1,538; AUC (95% CI) = 0.875 (0.864, 0.887)

<sup>b</sup>N Studies = 25; N Participants = 3,708; N major depression = 527; AUC (95% CI) = 0.895 (0.876, 0.913)

**Abbreviations:** CI: confidence interval



**eTable 4d. Comparison of PHQ-2 sensitivity and specificity estimates among participants aged < 60 compared to ≥ 60, among participants administered a semi-structured diagnostic interview**

| Cutoff | Age < 60 <sup>a</sup> |              |             |              | Age ≥ 60 <sup>b</sup> |              |             |              | Difference across groups<br>(Age < 60 – Age ≥ 60) |               |             |                |
|--------|-----------------------|--------------|-------------|--------------|-----------------------|--------------|-------------|--------------|---------------------------------------------------|---------------|-------------|----------------|
|        | Sensitivity           | 95% CI       | Specificity | 95% CI       | Sensitivity           | 95% CI       | Specificity | 95% CI       | Sensitivity                                       | 95% CI        | Specificity | 95% CI         |
| 2      | 0.93                  | (0.89, 0.96) | 0.64        | (0.61, 0.68) | 0.89                  | (0.81, 0.93) | 0.73        | (0.69, 0.76) | 0.04                                              | (-0.05, 0.08) | -0.08       | (-0.13, -0.05) |
| 3      | 0.71                  | (0.66, 0.77) | 0.84        | (0.81, 0.86) | 0.77                  | (0.67, 0.84) | 0.88        | (0.86, 0.90) | -0.05                                             | (-0.22, 0.03) | -0.04       | (-0.07, -0.01) |

<sup>a</sup>N Studies = 43; N Participants = 7,759; N major depression = 1117; AUC (95% CI) = 0.867 (0.853, 0.881)

<sup>b</sup>N Studies = 40; N Participants = 3,875; N major depression = 415; AUC (95% CI) = 0.886 (0.865, 0.908)

**Abbreviations:** CI: confidence interval

**eTable 4e. Comparison of PHQ-2 sensitivity and specificity estimates among women compared to men, among participants administered a semi-structured diagnostic interview**

| Cutoff | Women <sup>a</sup> |              |             |              | Men <sup>b</sup> |              |             |              | Difference across groups<br>(Women – Men) |               |             |                |
|--------|--------------------|--------------|-------------|--------------|------------------|--------------|-------------|--------------|-------------------------------------------|---------------|-------------|----------------|
|        | Sensitivity        | 95% CI       | Specificity | 95% CI       | Sensitivity      | 95% CI       | Specificity | 95% CI       | Sensitivity                               | 95% CI        | Specificity | 95% CI         |
| 2      | 0.93               | (0.88, 0.95) | 0.65        | (0.61, 0.68) | 0.89             | (0.84, 0.93) | 0.71        | (0.67, 0.75) | 0.03                                      | (-0.04, 0.08) | -0.06       | (-0.10, -0.03) |
| 3      | 0.74               | (0.67, 0.80) | 0.84        | (0.81, 0.87) | 0.70             | (0.64, 0.75) | 0.87        | (0.85, 0.89) | 0.04                                      | (-0.06, 0.12) | -0.03       | (-0.05, 0.00)  |

<sup>a</sup>N Studies = 47; N Participants = 7,280; N major depression = 1,054; AUC (95% CI) = 0.871 (0.857, 0.885)

<sup>b</sup>N Studies = 40; N Participants = 4,345; N major depression = 484; AUC (95% CI) = 0.880 (0.859, 0.900)

**Abbreviations:** CI: confidence interval

**Table 4f. Comparison of PHQ-2 sensitivity and specificity estimates among participants from countries with a very high human development index compared to a high human development index, among participants administered a semi-structured diagnostic interview**

| Cutoff | Very high human development index <sup>a</sup> |              |             |              | High human development index <sup>b</sup> |              |             |              | Difference across groups <sup>c</sup><br>(Very high human development index – high human development index) |               |             |               |
|--------|------------------------------------------------|--------------|-------------|--------------|-------------------------------------------|--------------|-------------|--------------|-------------------------------------------------------------------------------------------------------------|---------------|-------------|---------------|
|        | Sensitivity                                    | 95% CI       | Specificity | 95% CI       | Sensitivity                               | 95% CI       | Specificity | 95% CI       | Sensitivity                                                                                                 | 95% CI        | Specificity | 95% CI        |
| 2      | 0.93                                           | (0.89, 0.95) | 0.68        | (0.65, 0.72) | 0.86                                      | (0.70, 0.94) | 0.68        | (0.59, 0.76) | 0.06                                                                                                        | (-0.05, 0.23) | 0.00        | (-0.08, 0.10) |
| 3      | 0.73                                           | (0.68, 0.77) | 0.87        | (0.84, 0.89) | 0.73                                      | (0.55, 0.86) | 0.83        | (0.77, 0.87) | 0.01                                                                                                        | (-0.17, 0.18) | 0.04        | (-0.01, 0.09) |

<sup>a</sup>N Studies = 37; N Participants = 9,156; N major depression = 944; AUC (95% CI) = 0.890 (0.877, 0.904)

<sup>b</sup>N Studies = 8; N Participants = 1,957; N major depression = 356; AUC (95% CI) = 0.861 (0.835, 0.886)

<sup>c</sup>2 bootstrap iterations (0.2%) did not produce a difference estimate at cutoffs 2 and 3. These iterations were removed prior to determining the bootstrapped CIs for the respective cutoffs.

**Abbreviations:** CI: confidence interval

**eTable 4g. Comparison of PHQ-2 sensitivity and specificity estimates among participants from countries with a very high human development index compared to a low-medium human development index, among participants administered a semi-structured diagnostic interview**

| Cutoff | Very high human development index <sup>a</sup> |              |             |              | Low-medium human development index <sup>b</sup> |              |             |              | Difference across groups <sup>c</sup><br>(Very high human development index – low-medium human development index) |               |             |              |
|--------|------------------------------------------------|--------------|-------------|--------------|-------------------------------------------------|--------------|-------------|--------------|-------------------------------------------------------------------------------------------------------------------|---------------|-------------|--------------|
|        | Sensitivity                                    | 95% CI       | Specificity | 95% CI       | Sensitivity                                     | 95% CI       | Specificity | 95% CI       | Sensitivity                                                                                                       | 95% CI        | Specificity | 95% CI       |
| 2      | 0.93                                           | (0.89, 0.95) | 0.68        | (0.65, 0.72) | 0.87                                            | (0.69, 0.95) | 0.50        | (0.31, 0.69) | 0.06                                                                                                              | (-0.03, 0.17) | 0.18        | (0.06, 0.33) |
| 3      | 0.73                                           | (0.68, 0.77) | 0.87        | (0.84, 0.89) | 0.63                                            | (0.44, 0.79) | 0.69        | (0.50, 0.83) | 0.10                                                                                                              | (-0.08, 0.27) | 0.18        | (0.08, 0.32) |

<sup>a</sup>N Studies = 37; N Participants = 9,156; N major depression = 944; AUC (95% CI) = 0.890 (0.877, 0.904)

<sup>b</sup>N Studies = 3; N Participants = 590; N major depression = 188; AUC (95% CI) = 0.737 (0.691, 0.782)

<sup>c</sup>309 bootstrap iterations (30.9%) did not produce a difference estimate at cutoffs 2 and 3. These iterations were removed prior to determining the bootstrapped CIs for the respective cutoffs.

**Abbreviations:** CI: confidence interval

**eTable 4h. Comparison of PHQ-2 sensitivity and specificity estimates among participants from primary care and non-medical care settings, among participants administered a semi-structured diagnostic interview**

| Cutoff | Primary care <sup>a</sup> |              |             |              | Non-medical care <sup>b</sup> |              |             |              | Difference across groups <sup>c</sup><br>(Primary care – non-medical care) |               |             |               |
|--------|---------------------------|--------------|-------------|--------------|-------------------------------|--------------|-------------|--------------|----------------------------------------------------------------------------|---------------|-------------|---------------|
|        | Sensitivity               | 95% CI       | Specificity | 95% CI       | Sensitivity                   | 95% CI       | Specificity | 95% CI       | Sensitivity                                                                | 95% CI        | Specificity | 95% CI        |
| 2      | 0.95                      | (0.86, 0.98) | 0.69        | (0.61, 0.76) | 0.90                          | (0.71, 0.97) | 0.66        | (0.53, 0.77) | 0.05                                                                       | (-0.04, 0.14) | 0.03        | (-0.04, 0.12) |
| 3      | 0.75                      | (0.64, 0.84) | 0.86        | (0.81, 0.90) | 0.77                          | (0.62, 0.88) | 0.83        | (0.74, 0.89) | -0.02                                                                      | (-0.16, 0.15) | 0.03        | (-0.02, 0.08) |

<sup>a</sup>N Studies = 15; N Participants = 4,569; N major depression = 667; AUC (95% CI) = 0.890 (0.874, 0.907)

<sup>b</sup>N Studies = 2; N Participants = 567; N major depression = 105; AUC (95% CI) = 0.882 (0.839, 0.925)

<sup>c</sup>577 bootstrap iterations (57.7%) did not produce a difference estimate at cutoffs 2 and 3. These iterations were removed prior to determining the bootstrapped CIs for the respective cutoffs.

**Abbreviations:** CI: confidence interval

**eTable 4i. Comparison of PHQ-2 sensitivity and specificity estimates among participants from primary care and inpatient specialty care settings, among participants administered a semi-structured diagnostic interview**

| Cutoff | Primary care <sup>a</sup> |              |             |              | Inpatient specialty care <sup>b</sup> |              |             |              | Difference across groups <sup>c</sup><br>(Primary care – inpatient specialty care) |               |             |               |
|--------|---------------------------|--------------|-------------|--------------|---------------------------------------|--------------|-------------|--------------|------------------------------------------------------------------------------------|---------------|-------------|---------------|
|        | Sensitivity               | 95% CI       | Specificity | 95% CI       | Sensitivity                           | 95% CI       | Specificity | 95% CI       | Sensitivity                                                                        | 95% CI        | Specificity | 95% CI        |
| 2      | 0.95                      | (0.86, 0.98) | 0.69        | (0.61, 0.76) | 0.93                                  | (0.81, 0.98) | 0.62        | (0.58, 0.66) | 0.02                                                                               | (-0.08, 0.15) | 0.07        | (-0.01, 0.16) |
| 3      | 0.75                      | (0.64, 0.84) | 0.86        | (0.81, 0.90) | 0.75                                  | (0.61, 0.84) | 0.81        | (0.79, 0.83) | 0.01                                                                               | (-0.17, 0.22) | 0.05        | (0.00, 0.11)  |

<sup>a</sup>N Studies = 15; N Participants = 4,569; N major depression = 667; AUC (95% CI) = 0.890 (0.874, 0.907)

<sup>b</sup>N Studies = 10; N Participants = 2,019; N major depression = 184; AUC (95% CI) = 0.862 (0.828, 0.897)

<sup>c</sup>1 bootstrap iteration (0.1%) did not produce a difference estimate at cutoffs 2 and 3. These iterations were removed prior to determining the bootstrapped CIs for the respective cutoffs.

**Abbreviations:** CI: confidence interval

**eTable 4j. Comparison of PHQ-2 sensitivity and specificity estimates among participants from primary care and outpatient speciality care settings, among participants administered a semi-structured diagnostic interview**

| Cutoff | Primary care <sup>a</sup> |              |             |              | Outpatient specialty care <sup>b</sup> |              |             |              | Difference across groups<br>(Primary care – outpatient specialty care) |               |             |               |
|--------|---------------------------|--------------|-------------|--------------|----------------------------------------|--------------|-------------|--------------|------------------------------------------------------------------------|---------------|-------------|---------------|
|        | Sensitivity               | 95% CI       | Specificity | 95% CI       | Sensitivity                            | 95% CI       | Specificity | 95% CI       | Sensitivity                                                            | 95% CI        | Specificity | 95% CI        |
| 2      | 0.95                      | (0.86, 0.98) | 0.69        | (0.61, 0.76) | 0.89                                   | (0.83, 0.93) | 0.68        | (0.62, 0.73) | 0.06                                                                   | (-0.03, 0.12) | 0.01        | (-0.07, 0.09) |
| 3      | 0.75                      | (0.64, 0.84) | 0.86        | (0.81, 0.90) | 0.69                                   | (0.62, 0.75) | 0.87        | (0.83, 0.90) | 0.06                                                                   | (-0.07, 0.18) | -0.01       | (-0.06, 0.04) |

<sup>a</sup>N Studies = 15; N Participants = 4,569; N major depression = 667; AUC (95% CI) = 0.890 (0.874, 0.907)

<sup>b</sup>N Studies = 23; N Participants = 4,548; N major depression = 582; AUC (95% CI) = 0.875 (0.856, 0.893)

**Abbreviations:** CI: confidence interval

**eTable 4k. Comparison of PHQ-2 sensitivity and specificity estimates among studies and participants categorized as having “low” risk of bias compared to “high” or “unclear” risk of bias for QUADAS-2 Domain 1 (Participant Selection) - Signalling Question 1 (*Was a consecutive or random sample of participants enrolled?*), among participants administered a semi-structured diagnostic interview**

| Cutoff | Low risk of bias <sup>a</sup> |              |             |              | Unclear or high risk of bias <sup>b</sup> |              |             |              | Difference across groups <sup>c</sup><br>(Low risk of bias – unclear or high risk of bias) |               |             |               |
|--------|-------------------------------|--------------|-------------|--------------|-------------------------------------------|--------------|-------------|--------------|--------------------------------------------------------------------------------------------|---------------|-------------|---------------|
|        | Sensitivity                   | 95% CI       | Specificity | 95% CI       | Sensitivity                               | 95% CI       | Specificity | 95% CI       | Sensitivity                                                                                | 95% CI        | Specificity | 95% CI        |
| 2      | 0.94                          | (0.81, 0.99) | 0.66        | (0.54, 0.76) | 0.91                                      | (0.87, 0.94) | 0.67        | (0.64, 0.71) | 0.04                                                                                       | (-0.10, 0.09) | -0.01       | (-0.15, 0.09) |
| 3      | 0.75                          | (0.62, 0.85) | 0.87        | (0.79, 0.92) | 0.71                                      | (0.66, 0.77) | 0.85        | (0.82, 0.87) | 0.04                                                                                       | (-0.13, 0.18) | 0.02        | (-0.07, 0.07) |

<sup>a</sup>N Studies = 7; N Participants = 1,416; N major depression = 203

<sup>b</sup>N Studies = 41; N Participants = 10,287; N major depression = 1,335

<sup>c</sup>7 bootstrap iterations (0.7%) did not produce a difference estimate at cutoffs 2 and 3. These iterations were removed prior to determining the bootstrapped CIs for the respective cutoffs.

**Abbreviations:** CI: confidence interval



**eTable 4l. Comparison of PHQ-2 sensitivity and specificity estimates among studies and participants categorized as having “low” risk of bias compared to “high” or “unclear” risk of bias for QUADAS-2 Domain 3 (Reference Standard) - Signalling Question 2 (*Were the reference standard results interpreted without knowledge of the results of the index test?*) , among participants administered a semi-structured diagnostic interview**

| Cutoff | Low risk of bias <sup>a</sup> |              |             |              | Unclear or high risk of bias <sup>b</sup> |              |             |              | Difference across groups<br>(Low risk of bias – unclear or high risk of bias) |               |             |                |
|--------|-------------------------------|--------------|-------------|--------------|-------------------------------------------|--------------|-------------|--------------|-------------------------------------------------------------------------------|---------------|-------------|----------------|
|        | Sensitivity                   | 95% CI       | Specificity | 95% CI       | Sensitivity                               | 95% CI       | Specificity | 95% CI       | Sensitivity                                                                   | 95% CI        | Specificity | 95% CI         |
| 2      | 0.92                          | (0.88, 0.95) | 0.63        | (0.59, 0.67) | 0.90                                      | (0.81, 0.96) | 0.73        | (0.68, 0.77) | 0.02                                                                          | (-0.06, 0.11) | -0.09       | (-0.15, -0.04) |
| 3      | 0.73                          | (0.67, 0.79) | 0.83        | (0.79, 0.86) | 0.70                                      | (0.60, 0.78) | 0.88        | (0.85, 0.90) | 0.04                                                                          | (-0.08, 0.15) | -0.05       | (-0.09, -0.01) |

<sup>a</sup>N Studies = 28; N Participants = 7,068; N major depression = 932

<sup>b</sup>N Studies = 20; N Participants = 4,635; N major depression = 606

**Abbreviations:** CI: confidence interval

**eTable 4m. Comparison of PHQ-2 sensitivity and specificity estimates among studies and participants categorized as having “low” risk of bias compared to “high” or “unclear” risk of bias for QUADAS-2 Domain 3 (Reference Standard) - Signalling Question 3 (*Did a qualified person administer the reference standard?*), among participants administered a semi-structured diagnostic interview**

| Cutoff | Low risk of bias <sup>a</sup> |              |             |              | Unclear or high risk of bias <sup>b</sup> |              |             |              | Difference across groups<br>(Low risk of bias – unclear or high risk of bias) |               |             |               |
|--------|-------------------------------|--------------|-------------|--------------|-------------------------------------------|--------------|-------------|--------------|-------------------------------------------------------------------------------|---------------|-------------|---------------|
|        | Sensitivity                   | 95% CI       | Specificity | 95% CI       | Sensitivity                               | 95% CI       | Specificity | 95% CI       | Sensitivity                                                                   | 95% CI        | Specificity | 95% CI        |
| 2      | 0.90                          | (0.85, 0.93) | 0.68        | (0.63, 0.72) | 0.94                                      | (0.87, 0.98) | 0.66        | (0.60, 0.72) | -0.04                                                                         | (-0.11, 0.04) | 0.01        | (-0.05, 0.08) |
| 3      | 0.70                          | (0.64, 0.75) | 0.85        | (0.82, 0.88) | 0.77                                      | (0.66, 0.85) | 0.85        | (0.82, 0.88) | -0.07                                                                         | (-0.18, 0.06) | 0.00        | (-0.04, 0.05) |

<sup>a</sup>N Studies = 34; N Participants = 8,648; N major depression = 1,052

<sup>b</sup>N Studies = 14; N Participants = 3,055; N major depression = 486

**Abbreviations:** CI: confidence interval

**eTable 4n. Comparison of PHQ-2 sensitivity and specificity estimates among studies and participants categorized as having “low” risk of bias compared to “unclear” risk of bias for QUADAS-2 Domain 4 (Flow and Timing) - Signalling Question 1 (*Was there an appropriate interval between index test and reference standard?*), among participants administered a semi-structured interview**

| Cutoff | Low risk of bias <sup>a</sup> |              |             |              | Unclear risk of bias <sup>b</sup> |              |             |              | Difference across groups<br>(Low risk of bias – unclear or high risk of bias) |               |             |               |
|--------|-------------------------------|--------------|-------------|--------------|-----------------------------------|--------------|-------------|--------------|-------------------------------------------------------------------------------|---------------|-------------|---------------|
|        | Sensitivity                   | 95% CI       | Specificity | 95% CI       | Sensitivity                       | 95% CI       | Specificity | 95% CI       | Sensitivity                                                                   | 95% CI        | Specificity | 95% CI        |
| 2      | 0.92                          | (0.88, 0.95) | 0.66        | (0.62, 0.70) | 0.90                              | (0.78, 0.96) | 0.71        | (0.66, 0.76) | 0.02                                                                          | (-0.06, 0.12) | -0.06       | (-0.12, 0.00) |
| 3      | 0.74                          | (0.69, 0.79) | 0.84        | (0.81, 0.86) | 0.64                              | (0.52, 0.74) | 0.89        | (0.86, 0.92) | 0.11                                                                          | (-0.05, 0.24) | -0.05       | (-0.09, 0.01) |

<sup>a</sup>N Studies = 40; N Participants = 9,382; N major depression = 1260

<sup>b</sup>N Studies = 13; N Participants = 2,294; N major depression = 278

**Abbreviations:** CI: confidence interval

**eTable 4o. Comparison of PHQ-2 sensitivity and specificity estimates among studies and participants categorized as having “low” risk of bias compared to “high” or “unclear” risk of bias for QUADAS-2 Domain 4 (Flow and Timing) - Signalling Question 4 (*Were all patients included in the analysis?*), among participants administered a semi-structured diagnostic interview**

| Cutoff | Low risk of bias <sup>a</sup> |              |             |              | Unclear or high risk of bias <sup>b</sup> |              |             |              | Difference across groups<br>(Low risk of bias – unclear or high risk of bias) |               |             |               |
|--------|-------------------------------|--------------|-------------|--------------|-------------------------------------------|--------------|-------------|--------------|-------------------------------------------------------------------------------|---------------|-------------|---------------|
|        | Sensitivity                   | 95% CI       | Specificity | 95% CI       | Sensitivity                               | 95% CI       | Specificity | 95% CI       | Sensitivity                                                                   | 95% CI        | Specificity | 95% CI        |
| 2      | 0.88                          | (0.83, 0.92) | 0.67        | (0.62, 0.71) | 0.96                                      | (0.91, 0.98) | 0.68        | (0.62, 0.73) | -0.07                                                                         | (-0.13, 0.00) | -0.01       | (-0.07, 0.05) |
| 3      | 0.71                          | (0.64, 0.77) | 0.84        | (0.81, 0.87) | 0.75                                      | (0.67, 0.81) | 0.87        | (0.83, 0.90) | -0.04                                                                         | (-0.13, 0.10) | -0.02       | (-0.06, 0.02) |

<sup>a</sup>N Studies = 33; N Participants = 6,874; N major depression = 1,057

<sup>b</sup>N Studies = 15; N Participants = 4,829; N major depression = 481

**Abbreviations:** CI: confidence interval

**eTable 4p. Comparison of PHQ-2 sensitivity and specificity estimates among participants verified to not currently be diagnosed or receiving treatment for a mental health problem compared to all participants, among participants administered a fully structured diagnostic interview**

| Cutoff | All participants <sup>a</sup> |              |             |              | Participants verified to not currently be diagnosed or receiving treatment for a mental health problem <sup>b</sup> |              |             |              | Difference across groups <sup>c</sup><br>(All participants – participants verified to not currently be diagnosed or receiving treatment for a mental health problem) |               |             |               |
|--------|-------------------------------|--------------|-------------|--------------|---------------------------------------------------------------------------------------------------------------------|--------------|-------------|--------------|----------------------------------------------------------------------------------------------------------------------------------------------------------------------|---------------|-------------|---------------|
|        | Sensitivity                   | 95% CI       | Specificity | 95% CI       | Sensitivity                                                                                                         | 95% CI       | Specificity | 95% CI       | Sensitivity                                                                                                                                                          | 95% CI        | Specificity | 95% CI        |
| 2      | 0.82                          | (0.75, 0.87) | 0.71        | (0.63, 0.77) | 0.91                                                                                                                | (0.78, 0.97) | 0.71        | (0.54, 0.83) | -0.09                                                                                                                                                                | (-0.19, 0.00) | 0.00        | (-0.10, 0.16) |
| 3      | 0.53                          | (0.44, 0.62) | 0.89        | (0.84, 0.92) | 0.55                                                                                                                | (0.40, 0.68) | 0.91        | (0.83, 0.95) | -0.02                                                                                                                                                                | (-0.17, 0.14) | -0.02       | (-0.06, 0.07) |

<sup>a</sup>N Studies = 20; N Participants = 17,319; N major depression = 1,365; AUC (95% CI) = 0.821 (0.807, 0.835)

<sup>b</sup>N Studies = 5; N Participants = 4,050; N major depression = 292; AUC (95% CI) = 0.875 (0.848, 0.901)

<sup>c</sup>54 bootstrap iterations (5.4%) did not produce a difference estimate at cutoffs 2 and 3. These iterations were removed prior to determining the bootstrapped CIs for the respective cutoffs.

**Abbreviations:** CI: confidence interval

**eTable 4q. Comparison of PHQ-2 sensitivity and specificity estimates among participants aged < 60 compared to ≥ 60, among participants administered a fully structured diagnostic interview**

| Cutoff | Age < 60 <sup>a</sup> |              |             |              | Age ≥ 60 <sup>b</sup> |              |             |              | Difference across groups<br>(Age < 60 – Age ≥ 60) |               |             |               |
|--------|-----------------------|--------------|-------------|--------------|-----------------------|--------------|-------------|--------------|---------------------------------------------------|---------------|-------------|---------------|
|        | Sensitivity           | 95% CI       | Specificity | 95% CI       | Sensitivity           | 95% CI       | Specificity | 95% CI       | Sensitivity                                       | 95% CI        | Specificity | 95% CI        |
| 2      | 0.82                  | (0.74, 0.87) | 0.70        | (0.62, 0.77) | 0.84                  | (0.74, 0.90) | 0.74        | (0.65, 0.81) | -0.02                                             | (-0.13, 0.10) | -0.04       | (-0.10, 0.04) |
| 3      | 0.52                  | (0.43, 0.61) | 0.89        | (0.84, 0.93) | 0.59                  | (0.43, 0.73) | 0.88        | (0.82, 0.93) | -0.06                                             | (-0.24, 0.12) | 0.01        | (-0.02, 0.05) |

<sup>a</sup>N Studies = 20; N Participants = 13,901; N major depression = 1,097; AUC (95% CI) = 0.816 (0.800, 0.832)

<sup>b</sup>N Studies = 15; N Participants = 3,400; N major depression = 268; AUC (95% CI) = 0.841 (0.811, 0.871)

**Abbreviations:** CI: confidence interval

**eTable 4r. Comparison of PHQ-2 sensitivity and specificity estimates among women compared to men, among participants administered a fully structured diagnostic interview**

| Cutoff | Women <sup>a</sup> |              |             |              | Men <sup>b</sup> |              |             |              | Difference across groups<br>(Women – Men) |               |             |                |
|--------|--------------------|--------------|-------------|--------------|------------------|--------------|-------------|--------------|-------------------------------------------|---------------|-------------|----------------|
|        | Sensitivity        | 95% CI       | Specificity | 95% CI       | Sensitivity      | 95% CI       | Specificity | 95% CI       | Sensitivity                               | 95% CI        | Specificity | 95% CI         |
| 2      | 0.80               | (0.72, 0.86) | 0.68        | (0.52, 0.72) | 0.82             | (0.74, 0.88) | 0.73        | (0.65, 0.79) | -0.02                                     | (-0.13, 0.07) | -0.05       | (-0.10, -0.01) |
| 3      | 0.51               | (0.42, 0.61) | 0.88        | (0.78, 0.88) | 0.55             | (0.45, 0.65) | 0.89        | (0.85, 0.93) | -0.04                                     | (-0.17, 0.05) | -0.01       | (-0.04, 0.02)  |

<sup>a</sup>N Studies = 20; N Participants = 9,690; N major depression = 802; AUC (95% CI) = 0.809 (0.791, 0.828)

<sup>b</sup>N Studies = 18; N Participants = 7,619; N major depression = 561; AUC (95% CI) = 0.827 (0.806, 0.849)

**Abbreviations:** CI: confidence interval

**eTable 4s. Comparison of PHQ-2 sensitivity and specificity estimates among participants from countries with a very high human development index compared to a low-medium human development index, among participants administered a fully structured diagnostic interview**

| Cutoff | Very high human development index <sup>a</sup> |              |             |              | Low-medium human development index <sup>b</sup> |              |             |              | Difference across groups <sup>c</sup><br>(Very high human development index – low-medium human development index) |               |             |               |
|--------|------------------------------------------------|--------------|-------------|--------------|-------------------------------------------------|--------------|-------------|--------------|-------------------------------------------------------------------------------------------------------------------|---------------|-------------|---------------|
|        | Sensitivity                                    | 95% CI       | Specificity | 95% CI       | Sensitivity                                     | 95% CI       | Specificity | 95% CI       | Sensitivity                                                                                                       | 95% CI        | Specificity | 95% CI        |
| 2      | 0.82                                           | (0.74, 0.88) | 0.72        | (0.63, 0.79) | 0.76                                            | (0.57, 0.88) | 0.65        | (0.49, 0.79) | 0.07                                                                                                              | (-0.14, 0.22) | 0.06        | (-0.08, 0.21) |
| 3      | 0.52                                           | (0.42, 0.62) | 0.91        | (0.86, 0.94) | 0.61                                            | (0.34, 0.82) | 0.81        | (0.72, 0.88) | -0.09                                                                                                             | (-0.42, 0.16) | 0.10        | (0.02, 0.17)  |

<sup>a</sup>N Studies = 16; N Participants = 15,574; N major depression = 1,162; AUC (95% CI) = 0.833 (0.819, 0.848)

<sup>b</sup>N Studies = 4; N Participants = 1,745; N major depression = 203; AUC (95% CI) = 0.751 (0.711, 0.791)

<sup>c</sup>131 bootstrap iterations (13.1%) did not produce a difference estimate at cutoffs 2 and 3. These iterations were removed prior to determining the bootstrapped CIs for the respective cutoffs.

**Abbreviations:** CI: confidence interval



**eTable 4t. Comparison of PHQ-2 sensitivity and specificity estimates among participants from primary care and non-medical care settings, among participants administered a fully structured diagnostic interview**

| Cutoff | Primary care <sup>a</sup> |              |             |              | Non-medical care <sup>b</sup> |              |             |              | Difference across groups <sup>c</sup><br>(Primary care – non-medical care) |               |             |                |
|--------|---------------------------|--------------|-------------|--------------|-------------------------------|--------------|-------------|--------------|----------------------------------------------------------------------------|---------------|-------------|----------------|
|        | Sensitivity               | 95% CI       | Specificity | 95% CI       | Sensitivity                   | 95% CI       | Specificity | 95% CI       | Sensitivity                                                                | 95% CI        | Specificity | 95% CI         |
| 2      | 0.87                      | (0.78, 0.93) | 0.66        | (0.58, 0.74) | 0.69                          | (0.53, 0.82) | 0.79        | (0.73, 0.85) | 0.18                                                                       | (-0.01, 0.36) | -0.13       | (-0.22, -0.02) |
| 3      | 0.67                      | (0.54, 0.77) | 0.87        | (0.80, 0.91) | 0.37                          | (0.27, 0.47) | 0.94        | (0.89, 0.97) | 0.30                                                                       | (0.11, 0.46)  | -0.07       | (-0.14, -0.01) |

<sup>a</sup>N Studies = 7; N Participants = 4,789; N major depression = 429; AUC (95% CI) = 0.844 (0.820, 0.867)

<sup>b</sup>N Studies = 4; N Participants = 8,316; N major depression = 378; AUC (95% CI) = 0.801 (0.774, 0.829)

<sup>c</sup>119 bootstrap iterations (11.9%) did not produce a difference estimate at cutoffs 2 and 3. These iterations were removed prior to determining the bootstrapped CIs for the respective cutoffs.

**Abbreviations:** CI: confidence interval

**eTable 4u. Comparison of PHQ-2 sensitivity and specificity estimates among participants from primary care and inpatient specialty care settings, among participants administered a fully structured diagnostic interview**

| Cutoff | Primary care <sup>a</sup> |              |             |              | Inpatient specialty care <sup>b</sup> |              |             |              | Difference across groups <sup>c</sup><br>(Primary care – inpatient specialty care) |               |             |               |
|--------|---------------------------|--------------|-------------|--------------|---------------------------------------|--------------|-------------|--------------|------------------------------------------------------------------------------------|---------------|-------------|---------------|
|        | Sensitivity               | 95% CI       | Specificity | 95% CI       | Sensitivity                           | 95% CI       | Specificity | 95% CI       | Sensitivity                                                                        | 95% CI        | Specificity | 95% CI        |
| 2      | 0.87                      | (0.78, 0.93) | 0.66        | (0.58, 0.74) | 0.88                                  | (0.61, 0.97) | 0.62        | (0.29, 0.86) | -0.01                                                                              | (-0.15, 0.13) | 0.05        | (-0.05, 0.15) |
| 3      | 0.67                      | (0.54, 0.77) | 0.87        | (0.80, 0.91) | 0.76                                  | (0.58, 0.88) | 0.80        | (0.58, 0.92) | -0.10                                                                              | (-0.30, 0.05) | 0.07        | (-0.01, 0.12) |

<sup>a</sup>N Studies = 7; N Participants = 4,789; N major depression = 429; AUC (95% CI) = 0.844 (0.820, 0.867)

<sup>b</sup>N Studies = 2; N Participants = 593; N major depression = 72; AUC (95% CI) = 0.824 (0.764, 0.885)

<sup>c</sup>582 bootstrap iterations (58.2%) did not produce a difference estimate at cutoffs 2 and 3. These iterations were removed prior to determining the bootstrapped CIs for the respective cutoffs.

**Abbreviations:** CI: confidence interval

**eTable 4v. Comparison of PHQ-2 sensitivity and specificity estimates among participants from primary care and outpatient specialty care settings, among participants administered a fully structured diagnostic interview**

| Cutoff | Primary care <sup>a</sup> |              |             |              | Outpatient specialty care <sup>b</sup> |              |             |              | Difference across groups <sup>c</sup><br>(Primary care – outpatient specialty care) |               |             |               |
|--------|---------------------------|--------------|-------------|--------------|----------------------------------------|--------------|-------------|--------------|-------------------------------------------------------------------------------------|---------------|-------------|---------------|
|        | Sensitivity               | 95% CI       | Specificity | 95% CI       | Sensitivity                            | 95% CI       | Specificity | 95% CI       | Sensitivity                                                                         | 95% CI        | Specificity | 95% CI        |
| 2      | 0.87                      | (0.78, 0.93) | 0.66        | (0.58, 0.74) | 0.81                                   | (0.72, 0.87) | 0.72        | (0.54, 0.85) | 0.06                                                                                | (-0.06, 0.23) | -0.05       | (-0.19, 0.13) |
| 3      | 0.67                      | (0.54, 0.77) | 0.87        | (0.80, 0.91) | 0.43                                   | (0.30, 0.56) | 0.89        | (0.79, 0.95) | 0.24                                                                                | (-0.02, 0.46) | -0.02       | (-0.11, 0.08) |

<sup>a</sup>N Studies = 7; N Participants = 4,789; N major depression = 429; AUC (95% CI) = 0.844 (0.820, 0.867)

<sup>b</sup>N Studies = 7; N Participants = 3,621; N major depression = 486; AUC (95% CI) = 0.808 (0.784, 0.832)

<sup>c</sup>6 bootstrap iterations (0.6%) did not produce a difference estimate at cutoffs 2 and 3. These iterations were removed prior to determining the bootstrapped CIs for the respective cutoffs.

**Abbreviations:** CI: confidence interval

**Table 4w. Comparison of PHQ-2 sensitivity and specificity estimates among studies and participants categorized as having “low” risk of bias compared to “high” or “unclear” risk of bias for QUADAS-2 Domain 1 (Participant Selection) - Signalling Question 1 (*Was a consecutive or random sample of participants enrolled?*), among participants administered a fully structured diagnostic interview**

| Cutoff | Low risk of bias <sup>a</sup> |              |             |              | Unclear or high risk of bias <sup>b</sup> |              |             |              | Difference across groups <sup>c</sup><br>(Low risk of bias – unclear or high risk of bias) |               |             |               |
|--------|-------------------------------|--------------|-------------|--------------|-------------------------------------------|--------------|-------------|--------------|--------------------------------------------------------------------------------------------|---------------|-------------|---------------|
|        | Sensitivity                   | 95% CI       | Specificity | 95% CI       | Sensitivity                               | 95% CI       | Specificity | 95% CI       | Sensitivity                                                                                | 95% CI        | Specificity | 95% CI        |
| 2      | 0.91                          | (0.75, 0.97) | 0.72        | (0.60, 0.81) | 0.80                                      | (0.72, 0.86) | 0.70        | (0.60, 0.78) | 0.11                                                                                       | (-0.11, 0.20) | 0.02        | (-0.12, 0.13) |
| 3      | 0.67                          | (0.49, 0.81) | 0.87        | (0.80, 0.91) | 0.50                                      | (0.40, 0.60) | 0.90        | (0.84, 0.93) | 0.17                                                                                       | (-0.11, 0.38) | -0.03       | (-0.12, 0.03) |

<sup>a</sup>N Studies = 5; N Participants = 3,539; N major depression = 232

<sup>b</sup>N Studies = 15; N Participants = 13,780; N major depression = 1,133

<sup>c</sup>49 bootstrap iterations (4.9%) did not produce a difference estimate at cutoffs 2 and 3. These iterations were removed prior to determining the bootstrapped CIs for the respective cutoffs.

**Abbreviations:** CI: confidence interval

**eTable 4x. Comparison of PHQ-2 sensitivity and specificity estimates among studies and participants categorized as having “low” risk of bias compared to “high” or “unclear” risk of bias for QUADAS-2 Domain 3 (Reference Standard) - Signalling Question 2 (*Were the reference standard results interpreted without knowledge of the results of the index test?*), among participants administered a fully structured diagnostic interview**

| Cutoff | Low risk of bias <sup>a</sup> |              |             |              | Unclear or high risk of bias <sup>b</sup> |              |             |              | Difference across groups<br>(Low risk of bias – unclear or high risk of bias) |               |             |               |
|--------|-------------------------------|--------------|-------------|--------------|-------------------------------------------|--------------|-------------|--------------|-------------------------------------------------------------------------------|---------------|-------------|---------------|
|        | Sensitivity                   | 95% CI       | Specificity | 95% CI       | Sensitivity                               | 95% CI       | Specificity | 95% CI       | Sensitivity                                                                   | 95% CI        | Specificity | 95% CI        |
| 2      | 0.81                          | (0.70, 0.88) | 0.74        | (0.67, 0.80) | 0.82                                      | (0.71, 0.89) | 0.64        | (0.48, 0.78) | -0.01                                                                         | (-0.16, 0.11) | 0.10        | (-0.04, 0.28) |
| 3      | 0.56                          | (0.44, 0.67) | 0.91        | (0.86, 0.94) | 0.51                                      | (0.36, 0.65) | 0.86        | (0.76, 0.93) | 0.05                                                                          | (-0.15, 0.25) | 0.05        | (-0.03, 0.15) |

<sup>a</sup>N Studies = 12; N Participants = 10,020; N major depression = 927

<sup>b</sup>N Studies = 8; N Participants = 7,299; N major depression = 438

**Abbreviations:** CI: confidence interval

**eTable 4y. Comparison of PHQ-2 sensitivity and specificity estimates among studies and participants categorized as having “low” risk of bias compared to “unclear” risk of bias for QUADAS-2 Domain 4 (Flow and Timing) - Signalling Question 1 (*Was there an appropriate interval between index test and reference standard?*), among participants administered a fully structured interview**

| Cutoff | Low risk of bias <sup>a</sup> |              |             |              | Unclear risk of bias <sup>b</sup> |              |             |              | Difference across groups <sup>c</sup><br>(Low risk of bias – unclear or high risk of bias) |               |             |               |
|--------|-------------------------------|--------------|-------------|--------------|-----------------------------------|--------------|-------------|--------------|--------------------------------------------------------------------------------------------|---------------|-------------|---------------|
|        | Sensitivity                   | 95% CI       | Specificity | 95% CI       | Sensitivity                       | 95% CI       | Specificity | 95% CI       | Sensitivity                                                                                | 95% CI        | Specificity | 95% CI        |
| 2      | 0.82                          | (0.74, 0.88) | 0.70        | (0.61, 0.77) | 0.79                              | (0.65, 0.88) | 0.75        | (0.61, 0.85) | 0.03                                                                                       | (-0.13, 0.17) | -0.06       | (-0.18, 0.09) |
| 3      | 0.56                          | (0.46, 0.65) | 0.88        | (0.83, 0.92) | 0.45                              | (0.27, 0.65) | 0.91        | (0.83, 0.95) | 0.10                                                                                       | (-0.12, 0.33) | -0.03       | (-0.09, 0.05) |

<sup>a</sup>N Studies = 15; N Participants = 11,311; N major depression = 1,145

<sup>b</sup>N Studies = 6; N Participants = 6,008; N major depression = 220

<sup>c</sup>8 bootstrap iterations (0.8%) did not produce a difference estimate at cutoffs 2 and 3. These iterations were removed prior to determining the bootstrapped CIs for the respective cutoffs.

**Abbreviations:** CI: confidence interval

**eTable 4z. Comparison of PHQ-2 sensitivity and specificity estimates among studies and participants categorized as having “low” risk of bias compared to “high” or “unclear” risk of bias for QUADAS-2 Domain 4 (Flow and Timing) - Signalling Question 4 (*Were all patients included in the analysis?*), among participants administered a fully structured diagnostic interview**

| Cutoff | Low risk of bias <sup>a</sup> |              |             |              | Unclear or high risk of bias <sup>b</sup> |              |             |              | Difference across groups <sup>c</sup><br>(Low risk of bias – unclear or high risk of bias) |               |             |               |
|--------|-------------------------------|--------------|-------------|--------------|-------------------------------------------|--------------|-------------|--------------|--------------------------------------------------------------------------------------------|---------------|-------------|---------------|
|        | Sensitivity                   | 95% CI       | Specificity | 95% CI       | Sensitivity                               | 95% CI       | Specificity | 95% CI       | Sensitivity                                                                                | 95% CI        | Specificity | 95% CI        |
| 2      | 0.82                          | (0.74, 0.88) | 0.70        | (0.61, 0.78) | 0.78                                      | (0.65, 0.87) | 0.71        | (0.61, 0.79) | 0.04                                                                                       | (-0.10, 0.17) | -0.01       | (-0.10, 0.09) |
| 3      | 0.54                          | (0.43, 0.65) | 0.88        | (0.83, 0.92) | 0.48                                      | (0.38, 0.58) | 0.93        | (0.90, 0.95) | 0.06                                                                                       | (-0.11, 0.21) | -0.05       | (-0.09, 0.00) |

<sup>a</sup>N Studies = 17; N Participants = 15,278; N major depression = 1,167

<sup>b</sup>N Studies = 3; N Participants = 2,041; N major depression = 198

<sup>c</sup>305 bootstrap iterations (30.5%) did not produce a difference estimate at cutoffs 2 and 3. These iterations were removed prior to determining the bootstrapped CIs for the respective cutoffs.

**Abbreviations:** CI: confidence interval

**eTable 4aa. Comparison of PHQ-2 sensitivity and specificity estimates among participants verified to not currently be diagnosed or receiving treatment for a mental health problem compared to all participants, among participants administered the MINI**

| Cutoff | All participants <sup>a</sup> |              |             |              | Participants verified to not currently be diagnosed or receiving treatment for a mental health problem <sup>b</sup> |              |             |              | Difference across groups<br>(All participants – participants verified to not currently be diagnosed or receiving treatment for a mental health problem) |               |             |               |
|--------|-------------------------------|--------------|-------------|--------------|---------------------------------------------------------------------------------------------------------------------|--------------|-------------|--------------|---------------------------------------------------------------------------------------------------------------------------------------------------------|---------------|-------------|---------------|
|        | Sensitivity                   | 95% CI       | Specificity | 95% CI       | Sensitivity                                                                                                         | 95% CI       | Specificity | 95% CI       | Sensitivity                                                                                                                                             | 95% CI        | Specificity | 95% CI        |
| 2      | 0.89                          | (0.84, 0.92) | 0.68        | (0.64, 0.73) | 0.85                                                                                                                | (0.78, 0.90) | 0.74        | (0.68, 0.79) | 0.04                                                                                                                                                    | (-0.02, 0.12) | -0.05       | (-0.10, 0.00) |
| 3      | 0.69                          | (0.62, 0.75) | 0.87        | (0.84, 0.90) | 0.67                                                                                                                | (0.58, 0.75) | 0.89        | (0.85, 0.93) | 0.01                                                                                                                                                    | (-0.07, 0.12) | -0.02       | (-0.05, 0.01) |

<sup>a</sup>N Studies = 32; N Participants = 15,296; N major depression = 1,669; AUC (95% CI) = 0.866 (0.854, 0.877)

<sup>b</sup>N Studies = 15; N Participants = 8390; N major depression = 581; AUC (95% CI) = 0.863 (0.844, 0.882)

**Abbreviations:** CI: confidence interval



**eTable 4ab. Comparison of PHQ-2 sensitivity and specificity estimates among participants aged < 60 compared to ≥ 60, among participants administered the MINI**

| Cutoff | Age < 60 <sup>a</sup> |              |             |              | Age ≥ 60 <sup>b</sup> |              |             |              | Difference across groups<br>(Age < 60 – Age ≥ 60) |               |             |               |
|--------|-----------------------|--------------|-------------|--------------|-----------------------|--------------|-------------|--------------|---------------------------------------------------|---------------|-------------|---------------|
|        | Sensitivity           | 95% CI       | Specificity | 95% CI       | Sensitivity           | 95% CI       | Specificity | 95% CI       | Sensitivity                                       | 95% CI        | Specificity | 95% CI        |
| 2      | 0.89                  | (0.85, 0.93) | 0.67        | (0.62, 0.71) | 0.87                  | (0.80, 0.92) | 0.73        | (0.68, 0.77) | 0.02                                              | (-0.06, 0.09) | -0.06       | (-0.12, 0.00) |
| 3      | 0.69                  | (0.62, 0.75) | 0.87        | (0.84, 0.89) | 0.71                  | (0.62, 0.79) | 0.87        | (0.83, 0.90) | -0.02                                             | (-0.17, 0.07) | 0.00        | (-0.04, 0.03) |

<sup>a</sup>N Studies = 31; N Participants = 10,071; N major depression = 1,153; AUC (95% CI) = 0.863 (0.849, 0.877)

<sup>b</sup>N Studies = 26; N Participants = 5,192; N major depression = 506; AUC (95% CI) = 0.878 (0.858, 0.897)

**Abbreviations:** CI: confidence interval

**eTable 4ac. Comparison of PHQ-2 sensitivity and specificity estimates among women compared to men, among participants administered the MINI**

| Cutoff | Women <sup>a</sup> |              |             |              | Men <sup>b</sup> |              |             |              | Difference across groups<br>(Women – Men) |               |             |               |
|--------|--------------------|--------------|-------------|--------------|------------------|--------------|-------------|--------------|-------------------------------------------|---------------|-------------|---------------|
|        | Sensitivity        | 95% CI       | Specificity | 95% CI       | Sensitivity      | 95% CI       | Specificity | 95% CI       | Sensitivity                               | 95% CI        | Specificity | 95% CI        |
| 2      | 0.88               | (0.84, 0.92) | 0.64        | (0.58, 0.70) | 0.92             | (0.85, 0.96) | 0.72        | (0.67, 0.76) | -0.04                                     | (-0.09, 0.01) | -0.08       | (-0.14, 0.03) |
| 3      | 0.68               | (0.60, 0.74) | 0.85        | (0.81, 0.89) | 0.73             | (0.64, 0.80) | 0.88        | (0.85, 0.91) | -0.05                                     | (-0.15, 0.05) | -0.02       | (-0.06, 0.01) |

<sup>a</sup>N Studies = 31; N Participants = 9,053; N major depression = 1,138; AUC (95% CI) = 0.849 (0.834, 0.863)

<sup>b</sup>N Studies = 29; N Participants = 6,225; N major depression = 530; AUC (95% CI) = 0.895 (0.877, 0.913)

**Abbreviations:** CI: confidence interval

**eTable 4ad. Comparison of PHQ-2 sensitivity and specificity estimates among participants from countries with a very high human development index compared to a high human development index, among participants administered the MINI**

| Cutoff | Very high human development index <sup>a</sup> |              |             |              | High human development index <sup>b</sup> |              |             |              | Difference across groups <sup>c</sup><br>(Very high human development index – high human development index) |               |             |               |
|--------|------------------------------------------------|--------------|-------------|--------------|-------------------------------------------|--------------|-------------|--------------|-------------------------------------------------------------------------------------------------------------|---------------|-------------|---------------|
|        | Sensitivity                                    | 95% CI       | Specificity | 95% CI       | Sensitivity                               | 95% CI       | Specificity | 95% CI       | Sensitivity                                                                                                 | 95% CI        | Specificity | 95% CI        |
| 2      | 0.91                                           | (0.86, 0.94) | 0.69        | (0.64, 0.74) | 0.84                                      | (0.73, 0.91) | 0.65        | (0.60, 0.70) | 0.07                                                                                                        | (-0.02, 0.19) | 0.04        | (0.04, 0.13)  |
| 3      | 0.73                                           | (0.66, 0.79) | 0.87        | (0.84, 0.90) | 0.60                                      | (0.51, 0.69) | 0.87        | (0.83, 0.90) | 0.13                                                                                                        | (0.02, 0.25)  | 0.01        | (-0.04, 0.05) |

<sup>a</sup>N Studies = 21; N Participants = 10,699; N major depression = 1,141; AUC (95% CI) = 0.885 (0.872, 0.898)

<sup>b</sup>N Studies = 9; N Participants = 4,352; N major depression = 433; AUC (95% CI) = 0.826 (0.801,0.850)

**Abbreviations:** CI: confidence interval

**eTable 4ae. Comparison of PHQ-2 sensitivity and specificity estimates among participants from countries with a very high human development index compared to a low-medium human development index, among participants administered the MINI**

| Cutoff | Very high human development index <sup>a</sup> |              |             |              | Low-medium human development index <sup>b</sup> |              |             |              | Difference across groups <sup>c</sup><br>(Very high human development index – low-medium human development index) |               |             |               |
|--------|------------------------------------------------|--------------|-------------|--------------|-------------------------------------------------|--------------|-------------|--------------|-------------------------------------------------------------------------------------------------------------------|---------------|-------------|---------------|
|        | Sensitivity                                    | 95% CI       | Specificity | 95% CI       | Sensitivity                                     | 95% CI       | Specificity | 95% CI       | Sensitivity                                                                                                       | 95% CI        | Specificity | 95% CI        |
| 2      | 0.91                                           | (0.86, 0.94) | 0.69        | (0.64, 0.74) | 0.87                                            | (0.15, 1.00) | 0.73        | (0.35, 0.93) | 0.04                                                                                                              | (-0.04, 0.11) | -0.04       | (-0.12, 0.04) |
| 3      | 0.73                                           | (0.66, 0.79) | 0.87        | (0.84, 0.90) | 0.62                                            | (0.13, 0.95) | 0.86        | (0.60, 0.96) | 0.11                                                                                                              | (-0.14, 0.32) | 0.02        | (-0.04, 0.08) |

<sup>a</sup>N Studies = 21; N Participants = 10,699; N major depression = 1,141; AUC (95% CI) = 0.885 (0.872, 0.898)

<sup>b</sup>N Studies = 2; N Participants = 245; N major depression = 95; AUC (95% CI) = 0.824 (0.767, 0.881)

<sup>c</sup>591 bootstrap iterations (59.1%) did not produce a difference estimate at cutoffs 2 and 3. These iterations were removed prior to determining the bootstrapped CIs for the respective cutoffs.

**Abbreviations:** CI: confidence interval

**eTable 4af. Comparison of PHQ-2 sensitivity and specificity estimates among participants from primary care and non-medical care settings, among participants administered the MINI**

| Cutoff | Primary care <sup>a</sup> |              |             |              | Non-medical care <sup>b</sup> |              |             |              | Difference across groups <sup>c</sup><br>(Primary care – non-medical care) |               |             |               |
|--------|---------------------------|--------------|-------------|--------------|-------------------------------|--------------|-------------|--------------|----------------------------------------------------------------------------|---------------|-------------|---------------|
|        | Sensitivity               | 95% CI       | Specificity | 95% CI       | Sensitivity                   | 95% CI       | Specificity | 95% CI       | Sensitivity                                                                | 95% CI        | Specificity | 95% CI        |
| 2      | 0.94                      | (0.84, 0.98) | 0.62        | (0.52, 0.70) | 0.85                          | (0.75, 0.92) | 0.71        | (0.62, 0.79) | 0.09                                                                       | (-0.03, 0.23) | -0.10       | (-0.22, 0.03) |
| 3      | 0.67                      | (0.52, 0.80) | 0.86        | (0.80, 0.90) | 0.63                          | (0.50, 0.74) | 0.90        | (0.83, 0.95) | 0.05                                                                       | (-0.14, 0.28) | -0.05       | (-0.12, 0.02) |

<sup>a</sup>N Studies = 9; N Participants = 5,092; N major depression = 557; AUC (95% CI) = 0.861 (0.841, 0.881)

<sup>b</sup>N Studies = 8; N Participants = 6,792; N major depression = 470; AUC (95% CI) = 0.862 (0.841, 0.884)

<sup>c</sup>3 bootstrap iterations (0.3%) did not produce a difference estimate at cutoffs 2 and 3. These iterations were removed prior to determining the bootstrapped CIs for the respective cutoffs.

**Abbreviations:** CI: confidence interval

**eTable 4ag. Comparison of PHQ-2 sensitivity and specificity estimates among participants from primary care and inpatient specialty care settings, among participants administered the MINI**

| Cutoff | Primary care <sup>a</sup> |              |             |              | Inpatient specialty care <sup>b</sup> |              |             |              | Difference across groups <sup>c</sup><br>(Primary care – inpatient specialty care) |               |             |               |
|--------|---------------------------|--------------|-------------|--------------|---------------------------------------|--------------|-------------|--------------|------------------------------------------------------------------------------------|---------------|-------------|---------------|
|        | Sensitivity               | 95% CI       | Specificity | 95% CI       | Sensitivity                           | 95% CI       | Specificity | 95% CI       | Sensitivity                                                                        | 95% CI        | Specificity | 95% CI        |
| 2      | 0.94                      | (0.84, 0.98) | 0.62        | (0.52, 0.70) | 0.89                                  | (0.78, 0.95) | 0.69        | (0.65, 0.73) | 0.05                                                                               | (-0.07, 0.18) | -0.07       | (-0.20, 0.04) |
| 3      | 0.67                      | (0.52, 0.80) | 0.86        | (0.80, 0.90) | 0.72                                  | (0.62, 0.80) | 0.85        | (0.81, 0.88) | -0.05                                                                              | (-0.24, 0.17) | 0.01        | (-0.07, 0.06) |

<sup>a</sup>N Studies = 9; N Participants = 5,092; N major depression = 557; AUC (95% CI) = 0.861 (0.841, 0.881)

<sup>b</sup>N Studies = 4; N Participants = 619; N major depression = 135; AUC (95% CI) = 0.868 (0.828, 0.908)

<sup>c</sup>123 bootstrap iterations (12.3%) did not produce a difference estimate at cutoffs 2 and 3. These iterations were removed prior to determining the bootstrapped CIs for the respective cutoffs.

**Abbreviations:** CI: confidence interval

**eTable 4ah. Comparison of PHQ-2 sensitivity and specificity estimates among participants from primary care and outpatient specialty care settings, among participants administered the MINI**

| Cutoff | Primary care <sup>a</sup> |              |             |              | Outpatient specialty care <sup>b</sup> |              |             |              | Difference across groups <sup>c</sup><br>(Primary care – outpatient specialty care) |               |             |               |
|--------|---------------------------|--------------|-------------|--------------|----------------------------------------|--------------|-------------|--------------|-------------------------------------------------------------------------------------|---------------|-------------|---------------|
|        | Sensitivity               | 95% CI       | Specificity | 95% CI       | Sensitivity                            | 95% CI       | Specificity | 95% CI       | Sensitivity                                                                         | 95% CI        | Specificity | 95% CI        |
| 2      | 0.94                      | (0.84, 0.98) | 0.62        | (0.52, 0.70) | 0.87                                   | (0.80, 0.91) | 0.70        | (0.64, 0.76) | 0.07                                                                                | (-0.04, 0.16) | -0.09       | (-0.21, 0.03) |
| 3      | 0.67                      | (0.52, 0.80) | 0.86        | (0.80, 0.90) | 0.72                                   | (0.62, 0.80) | 0.86        | (0.82, 0.89) | -0.05                                                                               | (-0.23, 0.14) | 0.00        | (-0.07, 0.05) |

<sup>a</sup>N Studies = 9; N Participants = 5,092; N major depression = 557; AUC (95% CI) = 0.861 (0.841, 0.881)

<sup>b</sup>N Studies = 12; N Participants = 2,663; N major depression = 502; AUC (95% CI) = 0.867 (0.847, 0.888)

<sup>c</sup>2 bootstrap iterations (0.2%) did not produce a difference estimate at cutoffs 2 and 3. These iterations were removed prior to determining the bootstrapped CIs for the respective cutoffs.

**Abbreviations:** CI: confidence interval

**eTable 4ai. Comparison of PHQ-2 sensitivity and specificity estimates among studies and participants categorized as having “low” risk of bias compared to “high” or “unclear” risk of bias for QUADAS-2 Domain 1 (Participant Selection) - Signalling Question 1 (*Was a consecutive or random sample of participants enrolled?*), among participants administered the MINI**

| Cutoff | Low risk of bias <sup>a</sup> |              |             |              | Unclear or high risk of bias <sup>b</sup> |              |             |              | Difference across groups<br>(Low risk of bias – unclear or high risk of bias) |               |             |               |
|--------|-------------------------------|--------------|-------------|--------------|-------------------------------------------|--------------|-------------|--------------|-------------------------------------------------------------------------------|---------------|-------------|---------------|
|        | Sensitivity                   | 95% CI       | Specificity | 95% CI       | Sensitivity                               | 95% CI       | Specificity | 95% CI       | Sensitivity                                                                   | 95% CI        | Specificity | 95% CI        |
| 2      | 0.89                          | (0.84, 0.93) | 0.68        | (0.62, 0.74) | 0.89                                      | (0.80, 0.94) | 0.68        | (0.62, 0.74) | 0.01                                                                          | (-0.07, 0.10) | 0.00        | (-0.08, 0.08) |
| 3      | 0.71                          | (0.64, 0.78) | 0.89        | (0.85, 0.92) | 0.66                                      | (0.55, 0.75) | 0.85        | (0.81, 0.89) | 0.05                                                                          | (-0.08, 0.20) | 0.03        | (-0.01, 0.08) |

<sup>a</sup>N Studies = 14; N Participants = 11,244; N major depression = 897

<sup>b</sup>N Studies = 18; N Participants = 4,052; N major depression = 772

**Abbreviations:** CI: confidence interval



**eTable 4aj. Comparison of PHQ-2 sensitivity and specificity estimates among studies and participants categorized as having “low” risk of bias compared to “high” or “unclear” risk of bias for QUADAS-2 Domain 3 (Reference Standard) - Signalling Question 2 (*Were the reference standard results interpreted without knowledge of the results of the index test?*), among participants administered the MINI**

| Cutoff | Low risk of bias <sup>a</sup> |              |             |              | Unclear or high risk of bias <sup>b</sup> |              |             |              | Difference across groups<br>(Low risk of bias – unclear or high risk of bias) |               |             |               |
|--------|-------------------------------|--------------|-------------|--------------|-------------------------------------------|--------------|-------------|--------------|-------------------------------------------------------------------------------|---------------|-------------|---------------|
|        | Sensitivity                   | 95% CI       | Specificity | 95% CI       | Sensitivity                               | 95% CI       | Specificity | 95% CI       | Sensitivity                                                                   | 95% CI        | Specificity | 95% CI        |
| 2      | 0.89                          | (0.83, 0.94) | 0.67        | (0.61, 0.72) | 0.89                                      | (0.81, 0.93) | 0.71        | (0.64, 0.77) | 0.01                                                                          | (-0.06, 0.11) | -0.04       | (-0.11, 0.04) |
| 3      | 0.70                          | (0.61, 0.78) | 0.86        | (0.83, 0.89) | 0.67                                      | (0.59, 0.74) | 0.89        | (0.83, 0.93) | 0.03                                                                          | (-0.06, 0.19) | -0.03       | (-0.07, 0.03) |

<sup>a</sup>N Studies = 22; N Participants = 6,252; N major depression = 1,067

<sup>b</sup>N Studies = 10; N Participants = 9,044; N major depression = 602

**Abbreviations:** CI: confidence interval

**eTable 4ak. Comparison of PHQ-2 sensitivity and specificity estimates among studies and participants categorized as having “low” risk of bias compared to “unclear” risk of bias for QUADAS-2 Domain 4 (Flow and Timing) - Signalling Question 1 (*Was there an appropriate interval between index test and reference standard?*), among participants administered the MINI**

| Cutoff | Low risk of bias <sup>a</sup> |              |             |              | Unclear risk of bias <sup>b</sup> |              |             |              | Difference across groups<br>(Low risk of bias – unclear risk of bias) |               |             |               |
|--------|-------------------------------|--------------|-------------|--------------|-----------------------------------|--------------|-------------|--------------|-----------------------------------------------------------------------|---------------|-------------|---------------|
|        | Sensitivity                   | 95% CI       | Specificity | 95% CI       | Sensitivity                       | 95% CI       | Specificity | 95% CI       | Sensitivity                                                           | 95% CI        | Specificity | 95% CI        |
| 2      | 0.89                          | (0.83, 0.93) | 0.69        | (0.64, 0.74) | 0.90                              | (0.79, 0.95) | 0.67        | (0.56, 0.76) | -0.01                                                                 | (-0.10, 0.12) | 0.02        | (-0.08, 0.17) |
| 3      | 0.70                          | (0.62, 0.77) | 0.87        | (0.84, 0.90) | 0.64                              | (0.52, 0.75) | 0.87        | (0.77, 0.93) | 0.05                                                                  | (-0.16, 0.25) | 0.00        | (-0.06, 0.10) |

<sup>a</sup>N Studies = 28; N Participants = 12,090; N major depression = 1,410

<sup>b</sup>N Studies = 8; N Participants = 3,187; N major depression = 259

**Abbreviations:** CI: confidence interval

**eTable 4a. Comparison of PHQ-2 sensitivity and specificity estimates among studies and participants categorized as having “low” risk of bias compared to “unclear” risk of bias for QUADAS-2 Domain 4 (Flow and Timing) - Signalling Question 2 (Did all patients receive a reference standard?), among participants administered the MINI**

| Cutoff | Low risk of bias <sup>a</sup> |              |             |              | Unclear risk of bias <sup>b</sup> |              |             |              | Difference across groups <sup>c</sup><br>(Low risk of bias – unclear or high risk of bias) |               |             |               |
|--------|-------------------------------|--------------|-------------|--------------|-----------------------------------|--------------|-------------|--------------|--------------------------------------------------------------------------------------------|---------------|-------------|---------------|
|        | Sensitivity                   | 95% CI       | Specificity | 95% CI       | Sensitivity                       | 95% CI       | Specificity | 95% CI       | Sensitivity                                                                                | 95% CI        | Specificity | 95% CI        |
| 2      | 0.90                          | (0.85, 0.94) | 0.68        | (0.64, 0.72) | 0.81                              | (0.63, 0.92) | 0.72        | (0.53, 0.86) | 0.09                                                                                       | (-0.03, 0.26) | -0.04       | (-0.17, 0.14) |
| 3      | 0.69                          | (0.62, 0.75) | 0.87        | (0.84, 0.90) | 0.64                              | (0.43, 0.81) | 0.87        | (0.78, 0.92) | 0.05                                                                                       | (-0.16, 0.26) | 0.00        | (-0.06, 0.08) |

<sup>a</sup>N Studies = 27; N Participants = 14,151; N major depression = 1,429

<sup>b</sup>N Studies = 5; N Participants = 1,145; N major depression = 240

<sup>c</sup>48 bootstrap iterations (4.8%) did not produce a difference estimate at cutoffs 2 and 3. These iterations were removed prior to determining the bootstrapped CIs for the respective cutoffs.

**Abbreviations:** CI: confidence interval

**eTable 4am. Comparison of PHQ-2 sensitivity and specificity estimates among studies and participants categorized as having “low” risk of bias compared to “high” or “unclear” risk of bias for QUADAS-2 Domain 4 (Flow and Timing) - Signalling Question 4 (*Were all patients included in the analysis?*), among participants administered the MINI**

| Cutoff | Low risk of bias <sup>a</sup> |              |             |              | Unclear or high risk of bias <sup>b</sup> |              |             |              | Difference across groups <sup>c</sup><br>(Low risk of bias – unclear or high risk of bias) |               |             |               |
|--------|-------------------------------|--------------|-------------|--------------|-------------------------------------------|--------------|-------------|--------------|--------------------------------------------------------------------------------------------|---------------|-------------|---------------|
|        | Sensitivity                   | 95% CI       | Specificity | 95% CI       | Sensitivity                               | 95% CI       | Specificity | 95% CI       | Sensitivity                                                                                | 95% CI        | Specificity | 95% CI        |
| 2      | 0.89                          | (0.85, 0.93) | 0.67        | (0.62, 0.71) | 0.86                                      | (0.62, 0.95) | 0.77        | (0.63, 0.87) | 0.04                                                                                       | (-0.09, 0.26) | -0.11       | (-0.21, 0.11) |
| 3      | 0.71                          | (0.65, 0.77) | 0.86        | (0.83, 0.88) | 0.52                                      | (0.34, 0.71) | 0.92        | (0.82, 0.97) | 0.19                                                                                       | (-0.10, 0.40) | -0.06       | (-0.11, 0.05) |

<sup>a</sup>N Studies = 27; N Participants = 9,912; N major depression = 1260

<sup>b</sup>N Studies = 5; N Participants = 5,384; N major depression = 409

<sup>c</sup>60 bootstrap iterations (6.0%) did not produce a difference estimate at cutoffs 2 and 3. These iterations were removed prior to determining the bootstrapped CIs for the respective cutoffs.

**Abbreviations:** CI: confidence interval

**eTable 5. Sensitivity and specificity estimates for the PHQ-2 alone, the PHQ-9 alone, and for PHQ-2  $\geq$  2 followed by PHQ-9, among 44 studies (N participants = 10,627; N major depression = 1,361) that used a semi-structured reference standard and had both PHQ-2 and PHQ-9 item scores available**

| PHQ-2 alone |             |             | PHQ-9 alone |             |             | PHQ-2 $\geq$ 2 followed by PHQ-9 |             |             |
|-------------|-------------|-------------|-------------|-------------|-------------|----------------------------------|-------------|-------------|
| cutoff      | Sensitivity | Specificity | cutoff      | Sensitivity | Specificity | cutoff                           | Sensitivity | Specificity |
| <b>0</b>    | 1.00        | 0.00        | <b>0</b>    | 1.00        | 0.00        | <b>0</b>                         | 1.00        | 0.00        |
| <b>1</b>    | 0.98        | 0.46        | <b>1</b>    | 1.00        | 0.12        | <b>1</b>                         | 0.92        | 0.67        |
| <b>2</b>    | 0.92        | 0.67        | <b>2</b>    | 1.00        | 0.22        | <b>2</b>                         | 0.92        | 0.67        |
| <b>3</b>    | 0.72        | 0.85        | <b>3</b>    | 0.99        | 0.33        | <b>3</b>                         | 0.92        | 0.67        |
| <b>4</b>    | 0.56        | 0.93        | <b>4</b>    | 0.99        | 0.44        | <b>4</b>                         | 0.92        | 0.68        |
| <b>5</b>    | 0.35        | 0.97        | <b>5</b>    | 0.98        | 0.53        | <b>5</b>                         | 0.92        | 0.70        |
| <b>6</b>    | 0.22        | 0.99        | <b>6</b>    | 0.97        | 0.61        | <b>6</b>                         | 0.91        | 0.73        |
|             |             |             | <b>7</b>    | 0.96        | 0.68        | <b>7</b>                         | 0.90        | 0.76        |
|             |             |             | <b>8</b>    | 0.93        | 0.74        | <b>8</b>                         | 0.88        | 0.79        |
|             |             |             | <b>9</b>    | 0.89        | 0.79        | <b>9</b>                         | 0.85        | 0.83        |
|             |             |             | <b>10</b>   | 0.86        | 0.85        | <b>10</b>                        | 0.82        | 0.87        |
|             |             |             | <b>11</b>   | 0.82        | 0.88        | <b>11</b>                        | 0.79        | 0.89        |
|             |             |             | <b>12</b>   | 0.75        | 0.90        | <b>12</b>                        | 0.73        | 0.91        |
|             |             |             | <b>13</b>   | 0.67        | 0.93        | <b>13</b>                        | 0.66        | 0.93        |
|             |             |             | <b>14</b>   | 0.62        | 0.94        | <b>14</b>                        | 0.60        | 0.95        |
|             |             |             | <b>15</b>   | 0.53        | 0.96        | <b>15</b>                        | 0.52        | 0.96        |
|             |             |             | <b>16</b>   | 0.45        | 0.97        | <b>16</b>                        | 0.44        | 0.97        |
|             |             |             | <b>17</b>   | 0.37        | 0.98        | <b>17</b>                        | 0.36        | 0.98        |
|             |             |             | <b>18</b>   | 0.31        | 0.98        | <b>18</b>                        | 0.31        | 0.98        |
|             |             |             | <b>19</b>   | 0.27        | 0.99        | <b>19</b>                        | 0.26        | 0.99        |
|             |             |             | <b>20</b>   | 0.22        | 0.99        | <b>20</b>                        | 0.21        | 0.99        |
|             |             |             | <b>21</b>   | 0.17        | 1.00        | <b>21</b>                        | 0.17        | 1.00        |
|             |             |             | <b>22</b>   | 0.13        | 1.00        | <b>22</b>                        | 0.13        | 1.00        |
|             |             |             | <b>23</b>   | 0.10        | 1.00        | <b>23</b>                        | 0.10        | 1.00        |
|             |             |             | <b>24</b>   | 0.07        | 1.00        | <b>24</b>                        | 0.07        | 1.00        |
|             |             |             | <b>25</b>   | 0.05        | 1.00        | <b>25</b>                        | 0.05        | 1.00        |
|             |             |             | <b>26</b>   | 0.03        | 1.00        | <b>26</b>                        | 0.03        | 1.00        |
|             |             |             | <b>27</b>   | 0.02        | 1.00        | <b>27</b>                        | 0.02        | 1.00        |

**eTable 6. Comparison of sensitivity and specificity for PHQ-2  $\geq$  2 in combination with PHQ-9  $\geq$  5 to 15 versus sensitivity and specificity for PHQ-9  $\geq$  5 to 15, among studies that used a semi-structured diagnostic interview as the reference standard (N Studies = 44; N Participants = 10,627; N major depression = 1,361)**

| Cutoff         | PHQ-2 $\geq$ 2 followed by PHQ-9 $\geq$ 5 to 15 |              |             |              | PHQ-9 $\geq$ 5 to 15 |              |             |              |
|----------------|-------------------------------------------------|--------------|-------------|--------------|----------------------|--------------|-------------|--------------|
|                | Sensitivity                                     | 95% CI       | Specificity | 95% CI       | Sensitivity          | 95% CI       | Specificity | 95% CI       |
| 5              | 0.92                                            | (0.88, 0.95) | 0.70        | (0.67, 0.73) | 0.98                 | (0.95, 0.99) | 0.53        | (0.48, 0.57) |
| 6              | 0.91                                            | (0.87, 0.94) | 0.73        | (0.69, 0.76) | 0.97                 | (0.94, 0.98) | 0.61        | (0.57, 0.65) |
| 7              | 0.90                                            | (0.86, 0.94) | 0.76        | (0.72, 0.79) | 0.96                 | (0.92, 0.98) | 0.68        | (0.64, 0.72) |
| 8              | 0.88                                            | (0.83, 0.92) | 0.79        | (0.76, 0.82) | 0.93                 | (0.88, 0.95) | 0.74        | (0.70, 0.77) |
| 9 <sup>a</sup> | 0.85                                            | (0.80, 0.89) | 0.83        | (0.80, 0.85) | 0.89                 | (0.85, 0.93) | 0.79        | (0.76, 0.82) |
| 10             | 0.82                                            | (0.76, 0.86) | 0.87        | (0.84, 0.89) | 0.86                 | (0.80, 0.90) | 0.85        | (0.82, 0.87) |
| 11             | 0.79                                            | (0.73, 0.84) | 0.89        | (0.87, 0.91) | 0.82                 | (0.76, 0.87) | 0.88        | (0.85, 0.90) |
| 12             | 0.73                                            | (0.67, 0.78) | 0.91        | (0.89, 0.93) | 0.75                 | (0.69, 0.81) | 0.90        | (0.88, 0.92) |
| 13             | 0.66                                            | (0.60, 0.71) | 0.93        | (0.91, 0.94) | 0.67                 | (0.61, 0.73) | 0.93        | (0.91, 0.94) |
| 14             | 0.60                                            | (0.54, 0.66) | 0.95        | (0.93, 0.96) | 0.62                 | (0.55, 0.68) | 0.94        | (0.93, 0.96) |
| 15             | 0.52                                            | (0.45, 0.58) | 0.96        | (0.94, 0.97) | 0.53                 | (0.46, 0.59) | 0.96        | (0.94, 0.97) |

<sup>a</sup>For PHQ-2  $\geq$  2 in combination with PHQ-9  $\geq$  9, the default optimizer in glmer failed, thus bobyqa was used instead

**Abbreviations:** CI: confidence interval

eTable 7. QUADAS-2 ratings for each primary study included in the present study

| First Author, Year                | Domain 1: Participant Selection |     |     |      |      | Domain 2: Index Test |     |     |     | Domain 3: Reference Standard |     |     |      |     | Domain 4: Flow and Timing |     |     |     |     |
|-----------------------------------|---------------------------------|-----|-----|------|------|----------------------|-----|-----|-----|------------------------------|-----|-----|------|-----|---------------------------|-----|-----|-----|-----|
|                                   | SQ 1                            | SQ2 | SQ3 | RoB  | AC   | SQ 1                 | SQ2 | RoB | AC  | SQ 1                         | SQ2 | SQ3 | RoB  | AC  | SQ 1                      | SQ2 | SQ3 | SQ4 | RoB |
| <b>Semi-structured Interviews</b> |                                 |     |     |      |      |                      |     |     |     |                              |     |     |      |     |                           |     |     |     |     |
| Amoozegar, 2017 <sup>1</sup>      | U/C                             | Yes | Yes | Low  | Low  | N/A                  | N/A | Low | Low | Yes                          | Yes | U/C | U/C  | Low | U/C                       | Yes | Yes | No  | U/C |
| Amtmann, 2015 <sup>2</sup>        | No                              | Yes | Yes | U/C  | U/C  | N/A                  | N/A | Low | Low | Yes                          | Yes | Yes | Low  | Low | Yes                       | Yes | Yes | Yes | Low |
| Ayalon, 2010 <sup>3</sup>         | U/C                             | Yes | Yes | U/C  | Low  | N/A                  | N/A | Low | Low | Yes                          | U/C | Yes | U/C  | Low | Yes                       | Yes | Yes | Yes | Low |
| Beraldi, 2014 <sup>4</sup>        | U/C                             | Yes | Yes | U/C  | Low  | N/A                  | N/A | Low | Low | Yes                          | U/C | U/C | U/C  | Low | Yes                       | Yes | Yes | Yes | Low |
| Bernstein, 2018 <sup>5</sup>      | U/C                             | Yes | Yes | U/C  | U/C  | N/A                  | N/A | Low | Low | Yes                          | Yes | Yes | Low  | Low | Yes                       | Yes | Yes | Yes | Low |
| Bhana, 2015 <sup>6</sup>          | U/C                             | Yes | Yes | U/C  | Low  | N/A                  | N/A | Low | Low | Yes                          | U/C | Yes | U/C  | Low | Yes                       | Yes | Yes | Yes | U/C |
| Bombardier, 2012 <sup>7</sup>     | U/C                             | Yes | Yes | U/C  | Low  | N/A                  | N/A | Low | Low | Yes                          | Yes | Yes | Low  | Low | IPD <sup>b</sup>          | Yes | Yes | U/C | U/C |
| Chagas, 2013 <sup>8</sup>         | Yes                             | Yes | Yes | Low  | Low  | N/A                  | N/A | Low | Low | Yes                          | Yes | Yes | Low  | Low | Yes                       | Yes | Yes | No  | U/C |
| Chibanda, 2016 <sup>9</sup>       | U/C                             | Yes | Yes | U/C  | U/C  | N/A                  | N/A | Low | Low | Yes                          | Yes | Yes | Low  | Low | Yes                       | Yes | Yes | Yes | Low |
| Eack, 2006 <sup>10</sup>          | U/C                             | Yes | Yes | U/C  | U/C  | N/A                  | N/A | Low | Low | Yes                          | Yes | Yes | Low  | Low | Yes                       | Yes | Yes | Yes | Low |
| Fiest, 2014 <sup>11</sup>         | U/C                             | Yes | Yes | Low  | Low  | N/A                  | N/A | Low | Low | Yes                          | Yes | U/C | U/C  | Low | U/C                       | Yes | Yes | No  | U/C |
| Fischer, 2014 <sup>12</sup>       | U/C                             | Yes | Yes | U/C  | U/C  | N/A                  | N/A | Low | Low | Yes                          | U/C | Yes | U/C  | Low | Yes                       | Yes | Yes | Yes | Low |
| Gjerdingen, 2009 <sup>13</sup>    | No                              | Yes | Yes | U/C  | Low  | N/A                  | N/A | Low | Low | Yes                          | U/C | Yes | U/C  | Low | Yes                       | Yes | Yes | U/C | U/C |
| Gräfe, 2004 <sup>14</sup>         | Yes                             | Yes | Yes | Low  | Low  | N/A                  | N/A | Low | Low | Yes                          | Yes | U/C | U/C  | Low | Yes                       | Yes | Yes | U/C | U/C |
| Green, 2017 <sup>15</sup>         | No                              | Yes | No  | High | U/C  | N/A                  | N/A | Low | Low | Yes                          | U/C | Yes | U/C  | Low | IPD <sup>b</sup>          | Yes | Yes | No  | U/C |
| Green, 2018 <sup>16</sup>         | U/C                             | Yes | Yes | Low  | U/C  | N/A                  | N/A | Low | Low | Yes                          | Yes | Yes | Low  | Low | Yes                       | Yes | Yes | Yes | Low |
| Haroz, 2017 <sup>17</sup>         | Yes                             | Yes | Yes | Low  | U/C  | N/A                  | N/A | Low | Low | Yes                          | U/C | Yes | U/C  | Low | Yes                       | Yes | Yes | Yes | Low |
| Hitchon, 2019 <sup>18a</sup>      | U/C                             | Yes | Yes | U/C  | U/C  | N/A                  | N/A | Low | Low | Yes                          | Yes | Yes | Low  | Low | U/C                       | Yes | Yes | Yes | U/C |
| Khamseh, 2011 <sup>19</sup>       | U/C                             | Yes | Yes | U/C  | Low  | N/A                  | N/A | Low | Low | Yes                          | Yes | Yes | Low  | Low | Yes                       | Yes | Yes | Yes | Low |
| Kwan, 2012 <sup>20</sup>          | U/C                             | Yes | Yes | U/C  | Low  | N/A                  | N/A | Low | Low | Yes                          | U/C | U/C | U/C  | U/C | Yes                       | Yes | Yes | U/C | U/C |
| Lambert, 2015 <sup>21</sup>       | No                              | Yes | Yes | U/C  | U/C  | N/A                  | N/A | Low | Low | Yes                          | Yes | Yes | Low  | Low | Yes                       | Yes | Yes | Yes | Low |
| Lara, 2015 <sup>22</sup>          | No                              | Yes | Yes | U/C  | U/C  | N/A                  | N/A | Low | Low | Yes                          | U/C | Yes | U/C  | Low | Yes                       | Yes | Yes | Yes | Low |
| Lino, 2014 <sup>23</sup>          | No                              | Yes | Yes | U/C  | U/C  | N/A                  | N/A | Low | Low | Yes                          | Yes | Yes | Low  | Low | U/C                       | Yes | Yes | Yes | U/C |
| Liu, 2011 <sup>24</sup>           | U/C                             | Yes | Yes | U/C  | U/C  | N/A                  | N/A | Low | Low | Yes                          | Yes | Yes | Low  | Low | Yes                       | Yes | Yes | No  | U/C |
| Marrie, 2018 <sup>25</sup>        | U/C                             | Yes | Yes | U/C  | U/C  | N/A                  | N/A | Low | Low | Yes                          | Yes | Yes | Low  | Low | Yes                       | Yes | Yes | Yes | Low |
| Martin-Subero, 2017 <sup>26</sup> | No                              | Yes | Yes | U/C  | U/C  | N/A                  | N/A | Low | Low | Yes                          | Yes | Yes | Low  | Low | Yes                       | Yes | Yes | Yes | Low |
| McGuire, 2013 <sup>27</sup>       | U/C                             | Yes | Yes | Low  | Low  | N/A                  | N/A | Low | Low | Yes                          | Yes | No  | High | Low | Yes                       | Yes | Yes | Yes | Low |
| Osório, 2009 <sup>28</sup>        | No                              | Yes | Yes | U/C  | Low  | N/A                  | N/A | Low | Low | Yes                          | U/C | U/C | U/C  | Low | Yes                       | Yes | Yes | Yes | Low |
| Osório, 2012 <sup>29</sup>        | U/C                             | Yes | Yes | U/C  | U/C  | N/A                  | N/A | Low | Low | Yes                          | Yes | U/C | U/C  | Low | Yes                       | Yes | Yes | Yes | Low |
| Osório, 2015 <sup>30</sup>        | No                              | Yes | Yes | U/C  | U/C  | N/A                  | N/A | Low | Low | Yes                          | U/C | U/C | U/C  | Low | Yes                       | Yes | Yes | Yes | Low |
| Patten, 2015 <sup>31</sup>        | U/C                             | Yes | Yes | Low  | U/C  | N/A                  | N/A | Low | Low | Yes                          | Yes | Yes | Low  | Low | U/C                       | Yes | Yes | Yes | U/C |
| Picardi, 2005 <sup>32</sup>       | Yes                             | Yes | Yes | Low  | U/C  | N/A                  | N/A | Low | Low | Yes                          | Yes | Yes | Low  | Low | Yes                       | Yes | Yes | Yes | Low |
| Prisnie, 2016 <sup>33</sup>       | Yes                             | Yes | Yes | Low  | U/C  | N/A                  | N/A | Low | Low | Yes                          | Yes | Yes | Low  | Low | U/C                       | Yes | Yes | No  | U/C |
| Quinn, Unpublished <sup>a</sup>   | U/C                             | Yes | Yes | U/C  | Low  | N/A                  | N/A | Low | Low | Yes                          | Yes | Yes | Low  | Low | Yes                       | Yes | Yes | Yes | Low |
| Richardson, 2010 <sup>34</sup>    | U/C                             | Yes | Yes | U/C  | Low  | N/A                  | N/A | Low | Low | Yes                          | U/C | U/C | U/C  | Low | Yes                       | Yes | Yes | Yes | Low |
| Roch, 2016 <sup>35</sup>          | Yes                             | Yes | Yes | Low  | U/C  | N/A                  | N/A | Low | Low | Yes                          | Yes | U/C | U/C  | Low | Yes                       | Yes | Yes | Yes | Low |
| Rooney, 2013 <sup>36</sup>        | U/C                             | Yes | Yes | U/C  | Low  | N/A                  | N/A | Low | Low | Yes                          | U/C | Yes | U/C  | Low | Yes                       | Yes | Yes | Yes | Low |
| Shinn, 2017 <sup>37</sup>         | U/C                             | Yes | Yes | Low  | High | N/A                  | N/A | Low | Low | Yes                          | Yes | Yes | Low  | Low | Yes                       | Yes | Yes | Yes | Low |
| Sidebottom, 2012 <sup>38</sup>    | No                              | Yes | Yes | U/C  | U/C  | N/A                  | N/A | Low | Low | Yes                          | Yes | Yes | Low  | Low | IPD <sup>b</sup>          | Yes | Yes | No  | U/C |

|                                                              |     |     |     |     |     |     |     |     |     |     |     |     |      |     |                  |     |     |     |                  |
|--------------------------------------------------------------|-----|-----|-----|-----|-----|-----|-----|-----|-----|-----|-----|-----|------|-----|------------------|-----|-----|-----|------------------|
| <b>Simning, 2012<sup>39</sup></b>                            | No  | Yes | Yes | U/C | Low | N/A | N/A | Low | Low | Yes | U/C | U/C | U/C  | Low | Yes              | Yes | Yes | Yes | Low              |
| <b>Spangenberg, 2015<sup>40</sup></b>                        | No  | Yes | Yes | U/C | U/C | N/A | N/A | Low | U/C | Yes | U/C | No  | High | U/C | Yes              | Yes | Yes | Yes | Low              |
| <b>Swartz, 2017<sup>41</sup></b>                             | Yes | Yes | Yes | Low | Low | N/A | N/A | Low | Low | Yes | No  | No  | High | Low | IPD <sup>b</sup> | Yes | Yes | No  | High             |
| <b>Turner, 2012<sup>42</sup></b>                             | U/C | Yes | Yes | Low | Low | N/A | N/A | Low | Low | Yes | U/C | Yes | U/C  | Low | Yes              | Yes | Yes | Yes | Low              |
| <b>Turner, Unpublished<sup>a</sup></b>                       | U/C | Yes | Yes | U/C | U/C | N/A | N/A | Low | Low | Yes | U/C | Yes | U/C  | Low | Yes              | Yes | Yes | Yes | Low              |
| <b>Twist, 2013<sup>43</sup></b>                              | U/C | Yes | Yes | U/C | U/C | N/A | N/A | Low | Low | Yes | No  | Yes | High | Low | Yes              | Yes | Yes | U/C | U/C              |
| <b>Wagner, 2017<sup>44</sup></b>                             | U/C | Yes | Yes | U/C | Low | N/A | N/A | Low | Low | Yes | U/C | Yes | U/C  | Low | IPD <sup>b</sup> | No  | Yes | No  | High             |
| <b>Williams, 2012<sup>45</sup></b>                           | No  | Yes | Yes | U/C | Low | N/A | N/A | Low | Low | Yes | Yes | Yes | Low  | Low | IPD <sup>b</sup> | Yes | Yes | Yes | IPD <sup>b</sup> |
| <b>Wittkampf, 2009<sup>46</sup></b>                          | No  | Yes | Yes | U/C | Low | N/A | N/A | Low | Low | Yes | Yes | Yes | Low  | Low | Yes              | Yes | Yes | No  | U/C              |
| <b>Fully Structured Interviews</b>                           |     |     |     |     |     |     |     |     |     |     |     |     |      |     |                  |     |     |     |                  |
| <b>Arroll, 2010<sup>47</sup></b>                             | Yes | Yes | Yes | Low | Low | N/A | N/A | Low | Low | Yes | Yes | Yes | Low  | Low | Yes              | Yes | Yes | Yes | Low              |
| <b>Azah, 2005<sup>48</sup></b>                               | U/C | Yes | Yes | U/C | U/C | N/A | N/A | Low | Low | Yes | Yes | Yes | Low  | U/C | Yes              | U/C | Yes | U/C | U/C              |
| <b>de Man-van Ginkel, 2012<sup>49</sup></b>                  | No  | Yes | Yes | U/C | Low | N/A | N/A | Low | Low | Yes | Yes | Yes | Low  | Low | Yes              | Yes | Yes | Yes | Low              |
| <b>Delgado, 2011<sup>50</sup></b>                            | No  | Yes | Yes | U/C | Low | N/A | N/A | Low | Low | Yes | U/C | Yes | U/C  | Low | Yes              | Yes | Yes | Yes | Low              |
| <b>Fisher, 2016<sup>51</sup></b>                             | U/C | Yes | Yes | Low | Low | N/A | N/A | Low | Low | Yes | Yes | Yes | Low  | Low | Yes              | Yes | Yes | Yes | Low              |
| <b>Gelaye, 2014<sup>52</sup></b>                             | U/C | Yes | Yes | U/C | U/C | N/A | N/A | Low | Low | Yes | U/C | Yes | U/C  | Low | Yes              | Yes | Yes | Yes | Low              |
| <b>Grool, 2011<sup>53</sup></b>                              | U/C | Yes | Yes | Low | Low | N/A | N/A | Low | U/C | Yes | U/C | Yes | U/C  | Low | U/C              | Yes | Yes | Yes | U/C              |
| <b>Hahn, 2006<sup>54</sup></b>                               | U/C | Yes | Yes | U/C | U/C | N/A | N/A | Low | Low | Yes | U/C | Yes | U/C  | Low | U/C              | Yes | Yes | Yes | U/C              |
| <b>Henkel, 2004<sup>55</sup></b>                             | U/C | Yes | Yes | U/C | U/C | N/A | N/A | Low | Low | Yes | Yes | Yes | Low  | Low | Yes              | Yes | Yes | Yes | Low              |
| <b>Hobfoll, 2011<sup>56</sup></b>                            | U/C | Yes | Yes | U/C | U/C | N/A | N/A | Low | Low | Yes | U/C | Yes | U/C  | Low | U/C              | Yes | Yes | Yes | U/C              |
| <b>Kiely, 2014<sup>57</sup></b>                              | U/C | Yes | Yes | U/C | Low | N/A | N/A | Low | Low | Yes | U/C | Yes | U/C  | Low | U/C              | U/C | Yes | U/C | U/C              |
| <b>Kim, 2017<sup>58</sup></b>                                | U/C | Yes | Yes | U/C | U/C | N/A | N/A | Low | Low | Yes | Yes | Yes | Low  | Low | Yes              | Yes | Yes | Yes | Low              |
| <b>Kohrt, 2016<sup>59</sup></b>                              | Yes | Yes | Yes | Low | U/C | N/A | N/A | Low | Low | Yes | Yes | Yes | Low  | Low | Yes              | Yes | Yes | Yes | Low              |
| <b>Liu, 2015<sup>60</sup></b>                                | No  | Yes | Yes | U/C | U/C | N/A | N/A | Low | Low | Yes | U/C | Yes | U/C  | Low | U/C              | Yes | Yes | Yes | U/C              |
| <b>Mohd Sidik, 2012<sup>61</sup></b>                         | Yes | Yes | Yes | Low | Low | N/A | N/A | Low | Low | Yes | Yes | Yes | Low  | U/C | Yes              | Yes | Yes | Yes | Low              |
| <b>Patel, 2008<sup>62</sup></b>                              | Yes | Yes | Yes | Low | U/C | N/A | N/A | Low | Low | Yes | Yes | Yes | Low  | Low | Yes              | Yes | Yes | Yes | Low              |
| <b>Pence, 2012<sup>63</sup></b>                              | Yes | Yes | Yes | Low | U/C | N/A | N/A | Low | Low | Yes | Yes | Yes | Low  | Low | Yes              | Yes | Yes | Yes | Low              |
| <b>Razykov, 2013<sup>64</sup></b>                            | No  | Yes | Yes | U/C | U/C | N/A | N/A | Low | Low | Yes | U/C | Yes | U/C  | Low | Yes              | Yes | Yes | Yes | Low              |
| <b>Thombs, 2008<sup>65</sup></b>                             | No  | Yes | Yes | U/C | Low | N/A | N/A | Low | Low | Yes | Yes | Yes | Low  | Low | Yes              | Yes | Yes | Yes | Low              |
| <b>Zuithoff, 2009<sup>66</sup></b>                           | No  | Yes | Yes | U/C | U/C | N/A | N/A | Low | U/C | Yes | Yes | Yes | Low  | U/C | IPD <sup>b</sup> | Yes | Yes | No  | U/C              |
| <b>Mini International Neuropsychiatric Interviews (MINI)</b> |     |     |     |     |     |     |     |     |     |     |     |     |      |     |                  |     |     |     |                  |
| <b>Akena, 2013<sup>67</sup></b>                              | U/C | Yes | Yes | U/C | Low | N/A | N/A | Low | Low | Yes | Yes | Yes | Low  | Low | Yes              | Yes | Yes | Yes | Low              |
| <b>Baron, 2017<sup>68</sup></b>                              | Yes | Yes | Yes | Low | Low | N/A | N/A | Low | Low | Yes | Yes | Yes | Low  | Low | Yes              | Yes | Yes | Yes | Low              |
| <b>Buji, 2018<sup>69</sup></b>                               | Yes | Yes | Yes | Low | U/C | N/A | N/A | Low | Low | Yes | Yes | Yes | Low  | Low | Yes              | Yes | Yes | Yes | Low              |
| <b>Cholera, 2014<sup>70</sup></b>                            | U/C | Yes | Yes | U/C | U/C | N/A | N/A | Low | U/C | Yes | Yes | Yes | Low  | U/C | Yes              | No  | Yes | Yes | High             |
| <b>Conway, 2016<sup>71</sup></b>                             | U/C | Yes | Yes | U/C | Low | N/A | N/A | Low | Low | Yes | Yes | Yes | Low  | Low | IPD <sup>b</sup> | Yes | Yes | Yes | IPD <sup>b</sup> |
| <b>de la Torre, 2016<sup>72</sup></b>                        | Yes | Yes | Yes | Low | Low | N/A | N/A | Low | Low | Yes | Yes | Yes | Low  | Low | Yes              | Yes | Yes | Yes | Low              |
| <b>Garabiles, Unpublished<sup>a</sup></b>                    | No  | Yes | Yes | U/C | U/C | N/A | N/A | Low | Low | Yes | Yes | Yes | Low  | Low | Yes              | Yes | Yes | Yes | Low              |
| <b>Gholizadeh, 2019<sup>73a</sup></b>                        | U/C | Yes | Yes | U/C | Low | N/A | N/A | Low | Low | Yes | Yes | Yes | Low  | Low | IPD <sup>b</sup> | Yes | Yes | Yes | IPD <sup>b</sup> |
| <b>Hantsoo, 2017<sup>74</sup></b>                            | U/C | Yes | Yes | U/C | U/C | N/A | N/A | Low | Low | Yes | U/C | Yes | U/C  | Low | Yes              | Yes | Yes | Yes | Low              |
| <b>Hides, 2007<sup>75</sup></b>                              | No  | Yes | Yes | U/C | U/C | N/A | N/A | Low | Low | Yes | U/C | Yes | U/C  | Low | Yes              | Yes | Yes | Yes | Low              |
| <b>Hyphantis, 2011<sup>76</sup></b>                          | Yes | Yes | Yes | Low | Low | N/A | N/A | Low | Low | Yes | Yes | Yes | Low  | Low | U/C              | U/C | Yes | U/C | U/C              |
| <b>Hyphantis, 2014<sup>77</sup></b>                          | U/C | Yes | Yes | U/C | Low | N/A | N/A | Low | Low | Yes | Yes | Yes | Low  | Low | Yes              | Yes | Yes | Yes | Low              |
| <b>Inagaki, 2013<sup>78</sup></b>                            | Yes | Yes | Yes | Low | U/C | N/A | N/A | Low | Low | Yes | Yes | Yes | Low  | Low | Yes              | No  | Yes | Yes | High             |



|                                          |     |     |     |     |     |     |     |     |     |     |     |     |     |     |                  |     |     |     |                  |
|------------------------------------------|-----|-----|-----|-----|-----|-----|-----|-----|-----|-----|-----|-----|-----|-----|------------------|-----|-----|-----|------------------|
| <b>Janssen, 2016<sup>79</sup></b>        | Yes | Yes | Yes | Low | Low | N/A | N/A | Low | Low | Yes | U/C | Yes | U/C | Low | IPD <sup>b</sup> | Yes | Yes | U/C | U/C              |
| <b>Lamers, 2008<sup>80</sup></b>         | U/C | Yes | Yes | Low | Low | N/A | N/A | Low | Low | Yes | Yes | Yes | Low | Low | IPD <sup>b</sup> | Yes | Yes | No  | U/C              |
| <b>Levin-Aspenson, 2017<sup>81</sup></b> | U/C | Yes | Yes | U/C | U/C | N/A | N/A | Low | Low | Yes | U/C | Yes | U/C | Low | Yes              | Yes | Yes | Yes | Low              |
| <b>Liu, 2016<sup>82</sup></b>            | Yes | Yes | Yes | Low | U/C | N/A | N/A | Low | Low | Yes | U/C | Yes | U/C | Low | Yes              | Yes | Yes | Yes | Low              |
| <b>Lotrakul, 2008<sup>83</sup></b>       | No  | Yes | Yes | U/C | U/C | N/A | N/A | Low | Low | Yes | Yes | Yes | Low | Low | Yes              | No  | Yes | Yes | High             |
| <b>Muramatsu, 2007<sup>84</sup></b>      | U/C | Yes | Yes | U/C | U/C | N/A | N/A | Low | Low | Yes | Yes | Yes | Low | Low | Yes              | Yes | Yes | Yes | Low              |
| <b>Muramatsu, 2018<sup>85</sup></b>      | Yes | Yes | Yes | Low | U/C | N/A | N/A | Low | Low | Yes | Yes | Yes | Low | Low | Yes              | Yes | Yes | Yes | Low              |
| <b>Nakku, 2016<sup>86</sup></b>          | No  | Yes | Yes | U/C | U/C | N/A | N/A | Low | Low | Yes | Yes | Yes | Low | Low | Yes              | No  | Yes | No  | High             |
| <b>Paika, 2017<sup>87</sup></b>          | Yes | Yes | Yes | Low | U/C | N/A | N/A | Low | U/C | Yes | Yes | Yes | Low | Low | Yes              | Yes | Yes | Yes | Low              |
| <b>Park, 2013<sup>88</sup></b>           | U/C | Yes | Yes | U/C | U/C | N/A | N/A | Low | Low | Yes | U/C | Yes | U/C | Low | Yes              | Yes | Yes | Yes | Low              |
| <b>Persoons, 2001<sup>89</sup></b>       | Yes | Yes | Yes | Low | U/C | N/A | N/A | Low | Low | Yes | Yes | Yes | Low | Low | Yes              | Yes | Yes | Yes | Low              |
| <b>Rancans, 2018<sup>90</sup></b>        | Yes | Yes | Yes | Low | U/C | N/A | N/A | Low | Low | Yes | Yes | Yes | Low | Low | Yes              | Yes | Yes | Yes | Low              |
| <b>Santos, 2013<sup>91</sup></b>         | Yes | Yes | Yes | Low | Low | N/A | N/A | Low | Low | Yes | U/C | Yes | U/C | Low | U/C              | Yes | Yes | Yes | U/C              |
| <b>Stafford, 2007<sup>92</sup></b>       | No  | Yes | Yes | U/C | Low | N/A | N/A | Low | Low | Yes | Yes | Yes | Low | Low | Yes              | Yes | Yes | U/C | U/C              |
| <b>Sung, 2013<sup>93</sup></b>           | Yes | Yes | Yes | Low | U/C | N/A | N/A | Low | Low | Yes | Yes | Yes | Low | Low | Yes              | Yes | Yes | Yes | Low              |
| <b>Suzuki, 2015<sup>94</sup></b>         | U/C | Yes | Yes | U/C | Low | N/A | N/A | Low | Low | Yes | U/C | Yes | U/C | Low | Yes              | Yes | Yes | Yes | Low              |
| <b>van Heyningen, 2018<sup>95</sup></b>  | U/C | Yes | Yes | Low | U/C | N/A | N/A | Low | Low | Yes | U/C | Yes | U/C | Low | Yes              | Yes | Yes | Yes | Low              |
| <b>Volker, 2016<sup>96</sup></b>         | Yes | Yes | Yes | Low | U/C | N/A | N/A | Low | U/C | Yes | Yes | Yes | Low | U/C | IPD <sup>b</sup> | Yes | Yes | Yes | IPD <sup>b</sup> |
| <b>Zhang, 2013<sup>97</sup></b>          | U/C | Yes | Yes | U/C | Low | N/A | N/A | Low | Low | Yes | U/C | Yes | U/C | Low | IPD <sup>b</sup> | Yes | Yes | Yes | IPD <sup>b</sup> |

**Abbreviations:** AC: applicability concerns, IPD: individual participant data, N/A: not applicable; RoB: risk of bias, SQ: signalling question, U/C: Unclear

<sup>a</sup>Was unpublished at the time of electronic database search

<sup>b</sup>Rating varies at the individual participant level

## SUPPLEMENTARY MATERIAL REFERENCES

1. Amoozegar F, Patten SB, Becker WJ, et al. The prevalence of depression and the accuracy of depression screening tools in migraine patients. *Gen Hosp Psychiatry*. 2017;48:25-31.
2. Amtmann D, Bamer AM, Johnson KL, et al. A comparison of multiple patient reported outcome measures in identifying major depressive disorder in people with multiple sclerosis. *J Psychosom Res*. 2015;79:550-557.
3. Ayalon L, Goldfracht M, Bech P. 'Do you think you suffer from depression?' Re-evaluating the use of a single item question for the screening of depression in older primary care patients. *Int J Geriatr Psychiatry*. 2010;25:497-502.
4. Beraldi A, Baklayan A, Hoster E, Hiddemann W, Heussner P. Which questionnaire is most suitable for the detection of depressive disorders in haemato-oncological patients? Comparison between HADS, CES-D and PHQ-9. *Oncol Res Treat*. 2014;37:108-109.
5. Bernstein CN, Zhang L, Lix LM, et al. The validity and reliability of screening measures for depression and anxiety disorders in inflammatory bowel disease. *Inflamm Bowel Dis*. 2018;24:1867-1875.
6. Bhana A, Rathod SD, Selohilwe O, Kathree T, Petersen I. The validity of the Patient Health Questionnaire for screening depression in chronic care patients in primary health care in South Africa. *BMC Psychiatry*. 2015;15:118.
7. Bombardier CH, Kalpakjian CZ, Graves DE, Dyer JR, Tate DG, Fann JR. Validity of the Patient Health Questionnaire-9 in assessing major depressive disorder during inpatient spinal cord injury rehabilitation. *Arch Phys Med Rehabil*. 2012;93:1838-1845.
8. Chagas MH, Tumas V, Rodrigues GR, et al. Validation and internal consistency of Patient Health Questionnaire-9 for major depression in Parkinson's disease. *Age Ageing*.

2013;42:645-649.

9. Chibanda D, Verhey R, Gibson LJ, et al. Validation of screening tools for depression and anxiety disorders in a primary care population with high HIV prevalence in Zimbabwe. *J Affect Disord.* 2016;198:50-55.
10. Eack SM, Greeno CG, Lee BJ. Limitations of the Patient Health Questionnaire in identifying anxiety and depression in community mental health: Many cases are undetected. *Res Soc Work Pract.* 2006;16:625-631.
11. Fiest KM, Patten SB, Wiebe S, Bulloch AG, Maxwell CJ, Jette N. Validating screening tools for depression in epilepsy. *Epilepsia.* 2014;55:1642-1650.
12. Fischer HF, Klug C, Roeper K, et al. Screening for mental disorders in heart failure patients using computer-adaptive tests. *Qual Life Res.* 2014;23:1609-1618.
13. Gjerdingen D, Crow S, McGovern P, Miner M, Center B. Postpartum depression screening at well-child visits: validity of a 2-question screen and the PHQ-9. *Ann Fam Med.* 2009;7:63-70.
14. Gräfe K, Zipfel S, Herzog W, Löwe B. Screening for psychiatric disorders with the Patient Health Questionnaire (PHQ). Results from the German validation study. *Diagnostica.* 2004;50:171-181.
15. Green JD, Annunziata A, Kleiman SE, et al. Examining the diagnostic utility of the DSM-5 PTSD symptoms among male and female returning veterans. *Depress Anxiety.* 2017;34:752-760.
16. Green EP, Tuli H, Kwobah E, Menya D, Chesire I, Schmidt C. Developing and validating a perinatal depression screening tool in Kenya blending Western criteria with local idioms: a mixed methods study. *J Affect Disord.* 2018;228:49-59.

17. Haroz EE, Bass J, Lee C, et al. Development and cross-cultural testing of the International Depression Symptom Scale (IDSS): a measurement instrument designed to represent global presentations of depression. *GMH*. 2017;4.
18. Hitchon CA, Zhang L, Peschken CA, et al. The validity and reliability of screening measures for depression and anxiety disorders in rheumatoid arthritis. *Arthrit Care Res*. 2019.
19. Khamseh ME, Baradaran HR, Javanbakht A, Mirghorbani M, Yadollahi Z, Malek M. Comparison of the CES-D and PHQ-9 depression scales in people with type 2 diabetes in Tehran, Iran. *BMC Psychiatry*. 2011;11:61.
20. Kwan Y, Tham WY, Ang A. Validity of the Patient Health Questionnaire-9 (PHQ-9) in the screening of post-stroke depression in a multi-ethnic population. *Biol Psychiatry*. 2012;71:141S.
21. Lambert SD, Clover K, Pallant JF, et al. Making sense of variations in prevalence estimates of depression in cancer: A co-calibration of commonly used depression scales using Rasch analysis. *J Natl Compr Canc Netw*. 2015;13:1203-1211.
22. Lara MA, Navarrete L, Nieto L, Martín JP, Navarro JL, Lara-Tapia H. Prevalence and incidence of perinatal depression and depressive symptoms among Mexican women. *J Affect Disord*. 2015;175:18-24.
23. Lino VT, Portela MC, Camacho LA, et al. Screening for depression in low-income elderly patients at the primary care level: use of the Patient Health Questionnaire-2. *PLoS One*. 2014; 9:e113778.
24. Liu SI, Yeh ZT, Huang HC, et al. Validation of Patient Health Questionnaire for depression screening among primary care patients in Taiwan. *Compr Psychiatry*. 2011;52:96-101.
25. Marrie RA, Zhang L, Lix LM, et al. The validity and reliability of screening measures for

- depression and anxiety disorders in multiple sclerosis. *Mult Scler Relat Dis*. 2018;20:9-15.
26. Martin-Subero M, Kroenke K, Diez-Quevedo C, et al. Depression as measured by PHQ-9 versus clinical diagnosis as an independent predictor of long-term mortality in a prospective cohort of medical inpatients. *Psychosom Med*. 2017;79:273-282.
27. McGuire AW, Eastwood JA, Macabasco-O'Connell A, Hays RD, Doering LV. Depression screening: utility of the Patient Health Questionnaire in patients with acute coronary syndrome. *Am J Crit Care*. 2013;22:12-19.
28. Osório FL, Vilela Mendes A, Crippa JA, Loureiro SR. Study of the discriminative validity of the PHQ-9 and PHQ-2 in a sample of Brazilian women in the context of primary health care. *Perspect Psychiatr Care*. 2009;45:216-227.
29. Osório FL, Carvalho AC, Fracalossi TA, Crippa JA, Loureiro ES. Are two items sufficient to screen for depression within the hospital context? *Int J Psychiatry Med*. 2012;44:141-148.
30. Osório FL, Lima MP, Chagas MH. Screening tools for psychiatry disorders in cancer setting: caution when using. *Psychiatry Res*. 2015;229:739-742.
31. Patten SB, Burton JM, Fiest KM, et al. Validity of four screening scales for major depression in MS. *Mult Scler*. 2015;21:1064-1071.
32. Picardi A, Adler DA, Abeni D, et al. Screening for depressive disorders in patients with skin diseases: a comparison of three screeners. *Acta Derm Venereol*. 2005;85:414-419.
33. Prisdie JC, Fiest KM, Coutts SB, et al. Validating screening tools for depression in stroke and transient ischemic attack patients. *Int J Psychiatry Med*. 2016;51:262-277.
34. Richardson TM, He H, Podgorski C, Tu X, Conwell Y. Screening depression aging services clients. *Am J Geriatr Psychiatry*. 2010;18:1116-1123.
35. Roch S, Fydrich T, Kuech D, et al. Measurement of depression and anxiety in

multidisciplinary inpatient orthopedic rehabilitation - a questionnaire validation with the SCID. *Phys Med Rehab Kuror*. 2016;26:130-136.

36. Rooney AG, McNamara S, Mackinnon M, et al. Screening for major depressive disorder in adults with cerebral glioma: an initial validation of 3 self-report instruments. *Neuro-oncology*. 2013;15:122-129.
37. Shinn EH, Valentine A, Baum G, et al. Comparison of four brief depression screening instruments in ovarian cancer patients: diagnostic accuracy using traditional versus alternative cutpoints. *Gynecol Oncol*. 2017;145:562-568.
38. Sidebottom AC, Harrison PA, Godecker A, Kim H. Validation of the Patient Health Questionnaire (PHQ)-9 for prenatal depression screening. *Arch Womens Ment Health*. 2012;15:367-374.
39. Simning A, van Wijngaarden E, Fisher SG, Richardson TM, Conwell Y. Mental healthcare need and service utilization in older adults living in public housing. *Am J Geriatr Psychiatry*. 2012;20:441-451.
40. Spangenberg L, Glaesmer H, Boecker M, Forkmann T. Differences in Patient Health Questionnaire and Aachen Depression Item Bank scores between tablet versus paper-and-pencil administration. *Qual Life Res*. 2015;24:3023-3032.
41. Swartz RH, Cayley ML, Lanctôt KL, et al. The “dOC” screen: feasible and valid screening for depression, obstructive sleep apnea (OSA) and cognitive impairment in stroke prevention clinics. *PLoS One*. 2017;12:e0174451.
42. Turner A, Hambridge J, White J, et al. Depression screening in stroke: a comparison of alternative measures with the structured diagnostic interview for the Diagnostic and Statistical Manual of Mental Disorders, Fourth Edition (major depressive episode) as

- criterion standard. *Stroke*. 2012;43:1000-1005.
43. Twist K, Stahl D, Amiel SA, Thomas S, Winkley K, Ismail K. Comparison of depressive symptoms in type 2 diabetes using a two-stage survey design. *Psychosom Medicine*. 2013;75:791-797.
  44. Wagner LI, Pugh SL, Small Jr W, et al. Screening for depression in cancer patients receiving radiotherapy: feasibility and identification of effective tools in the NRG Oncology RTOG 0841 trial. *Cancer*. 2017;123:485-493.
  45. Williams JR, Hirsch ES, Anderson K, et al. A comparison of nine scales to detect depression in Parkinson disease: which scale to use? *Neurology*. 2012;78:998-1006.
  46. Wittkamp K, van Ravesteijn H, Baas K, et al. The accuracy of Patient Health Questionnaire-9 in detecting depression and measuring depression severity in high-risk groups in primary care. *Gen Hosp Psychiatry*. 2009;31:451-459.
  47. Arroll B, Goodyear-Smith F, Crengle S, et al. Validation of PHQ-2 and PHQ-9 to screen for major depression in the primary care population. *Ann Fam Med*. 2010;8:348-353.
  48. Azah MN, Shah ME, Shaaban J, Bahri IS, Rushidi WM, Jamil YM. Validation of the Malay version brief Patient Health Questionnaire (PHQ-9) among adult attending family medicine clinics. *Int Med J Tokyo*. 2005;12:259-263.
  49. De Man-van Ginkel JM, Hafsteinsdóttir T, Lindeman E, Burger H, Grobbee D, Schuurmans M. An efficient way to detect poststroke depression by subsequent administration of a 9-item and a 2-item Patient Health Questionnaire. *Stroke*. 2012;43:854-856.
  50. Delgadillo J, Payne S, Gilbody S, et al. How reliable is depression screening in alcohol and drug users? A validation of brief and ultra-brief questionnaires. *J Affect Disord*. 2011;134:266-271.

51. Fisher J, Rowe H, Wynter K, et al. Gender-informed, psychoeducational programme for couples to prevent postnatal common mental disorders among primiparous women: cluster randomised controlled trial. *BMJ Open*. 2016;6:e009396.
52. Gelaye B, Tadesse MG, Williams MA, Fann JR, Vander Stoep A, Zhou XH. Assessing validity of a depression screening instrument in the absence of a gold standard. *Ann Epidemiol*. 2014;24:527-531.
53. Grool AM, van der Graaf Y, Mali WP, Geerlings MI. Location of cerebrovascular and degenerative changes, depressive symptoms and cognitive functioning in later life: the SMART-Medea study. *J Neurol Neurosurg Psychiatry*. 2011;82:1093-1100.
54. Hahn D, Reuter K, Harter M. Screening for affective and anxiety disorders in medical patients - comparison of HADS, GHQ-12 and Brief-PHQ. *GMS Psychsoc Med*. 2006;3.
55. Henkel V, Mergl R, Kohnen R, Allgaier AK, Moller HJ, Hegerl U. Use of brief depression screening tools in primary care: consideration of heterogeneity in performance in different patient groups. *Gen Hosp Psychiatry*. 2004;26:190-198.
56. Hobfoll SE, Canetti D, Hall BJ, et al. Are community studies of psychological trauma's impact accurate? A study among Jews and Palestinians. *Psychol Assess*. 2011;23:599-605.
57. Kiely KM, Butterworth P. Validation of four measures of mental health against depression and generalized anxiety in a community based sample. *Psychiatry Res*. 2014;225:291-298.
58. Kim DJ, Kim K, Lee HW, et al. Internet game addiction, depression, and escape from negative emotions in adulthood: a nationwide community sample of Korea. *J Nerv Ment Dis*. 2017;205:568-573.
59. Kohrt BA, Luitel NP, Acharya P, Jordans MJ. Detection of depression in low resource settings: validation of the Patient Health Questionnaire (PHQ-9) and cultural concepts of



- distress in Nepal. *BMC Psychiatry*. 2016;16:58.
60. Liu Y, Wang J. Validity of the patient health questionnaire-9 for DSM-IV major depressive disorder in a sample of Canadian working population. *J Affect Disord*. 2015;187:122-126.
61. Mohd Sidik S, Arroll B, Goodyear-Smith F. Criterion validity of the PHQ-9 (Malay version) in a primary care clinic in Malaysia. *Med J Malaysia*. 2012;67:309-315.
62. Patel V, Araya R, Chowdhary N, et al. Detecting common mental disorders in primary care in India: a comparison of five screening questionnaires. *Psychol Med*. 2008;38:221-228.
63. Pence BW, Gaynes BN, Atashili J, et al. Validity of an interviewer-administered Patient Health Questionnaire-9 to screen for depression in HIV-infected patients in Cameroon. *J Affect Disord*. 2012;143:208-213.
64. Razykov I, Hudson M, Baron M, Thombs BD, Canadian Scleroderma Research Group. Utility of the Patient Health Questionnaire-9 to assess suicide risk in patients with systemic sclerosis. *Arth Care Res*. 2013;65:753-758.
65. Thombs BD, Ziegelstein RC, Whooley MA. Optimizing detection of major depression among patients with coronary artery disease using the Patient Health Questionnaire: data from the heart and soul study. *J Gen Intern Med*. 2008;23:2014-2017.
66. Zuithoff NP, Vergouwe Y, King M, et al. A clinical prediction rule for detecting major depressive disorder in primary care: the PREDICT-NL study. *J Fam Pract*. 2009;26:241-250.
67. Akena D, Joska J, Obuku EA, Stein DJ. Sensitivity and specificity of clinician administered screening instruments in detecting depression among HIV-positive individuals in Uganda. *AIDS Care*. 2013;25:1245-1252.
68. Baron EC, Davies T, Lund C. Validation of the 10-item centre for epidemiological studies

depression scale (CES-D-10) in Zulu, Xhosa and Afrikaans populations in South Africa. *BMC Psychiatry*. 2017;17:6.

69. Buji RI, Abdul Murad NA, Chan LF, et al. Suicidal ideation in systemic lupus erythematosus: NR2A gene polymorphism, clinical and psychosocial factors. *Lupus*. 2018;27:744-752.
70. Cholera R, Gaynes BN, Pence BW, et al. Validity of the Patient Health Questionnaire-9 to screen for depression in a high-HIV burden primary healthcare clinic in Johannesburg, South Africa. *J Affect Disord*. 2014;167:160-166.
71. Conway A, Sheridan J, Maddicks-Law J, et al. Accuracy of anxiety and depression screening tools in heart transplant recipients. *Appl Nurs Res*. 2016;32:177-181.
72. de la Torre AY, Oliva N, Echevarrieta PL, et al. Major depression in hospitalized Argentine general medical patients: prevalence and risk factors. *J Affect Disord*. 2016;197:36-42.
73. Gholizadeh L, Shahmansouri N, Heydari M, Davidson PM. Assessment and detection of depression in patients with coronary artery disease: validation of the Persian version of the PHQ-9. *Contemp Nurse*. 2019;55:185-194.
74. Hantsoo L, Podcasy J, Sammel M, Epperson CN, Kim DR. Pregnancy and the acceptability of computer-based versus traditional mental health treatments. *J Womens Health*. 2017;26:1106-1113.
75. Hides L, Lubman DI, Devlin H, et al. Reliability and validity of the Kessler 10 and Patient Health Questionnaire among injecting drug users. *Aust N Z J Psychiatry*. 2007;41:166-168.
76. Hyphantis T, Kotsis K, Voulgari PV, Tsifetaki N, Creed F, Drosos AA. Diagnostic accuracy, internal consistency, and convergent validity of the Greek version of the Patient Health Questionnaire 9 in diagnosing depression in rheumatologic disorders. *Arthritis Care Res*.

2011;63:1313-1321.

77. Hyphantis T, Kroenke K, Papatheodorou E, et al. Validity of the Greek version of the PHQ 15-item Somatic Symptom Severity Scale in patients with chronic medical conditions and correlations with emergency department use and illness perceptions. *Compr Psychiatry*. 2014;55:1950-1959.
78. Inagaki M, Ohtsuki T, Yonemoto N, et al. Validity of the Patient Health Questionnaire (PHQ)-9 and PHQ-2 in general internal medicine primary care at a Japanese rural hospital: a cross-sectional study. *Gen Hosp Psychiatry*. 2013;35:592-597.
79. Janssen EP, Köhler S, Stehouwer CD, et al. The Patient Health Questionnaire-9 as a screening tool for depression in individuals with type 2 diabetes mellitus: the Maastricht study. *J Am Geriatr Soc*. 2016;64:e201-206.
80. Lamers F, Jonkers CC, Bosma H, Penninx BW, Knottnerus JA, van Eijk JT. Summed score of the Patient Health Questionnaire-9 was a reliable and valid method for depression screening in chronically ill elderly patients. *J Clin Epidemiol*. 2008;61:679-687.
81. Levin-Aspenson HF, Watson D. Mode of administration effects in psychopathology assessment: analyses of gender, age, and education differences in self-rated versus interview-based depression. *Psychol Assess*. 2018;30:287.
82. Liu H, He YL, Miao JM, Wang JY, Zeng QZ. Validity and reliability of the 12-item Short Form Health Survey in outpatients from traditional Chinese internal department. *Chin Ment Health J*. 2016;30:6-12.
83. Lotrakul M, Sumrithe S, Saipanish R. Reliability and validity of the Thai version of the PHQ-9. *BMC Psychiatry*. 2008;8:46.
84. Muramatsu K, Miyaoka H, Kamijima K, et al. The Patient Health Questionnaire, Japanese

version: validity according to the Mini-International Neuropsychiatric Interview-Plus.  
*Psychol Rep.* 2007;101:952-960.

85. Muramatsu K, Miyaoka H, Kamijima K, et al. Performance of the Japanese version of the Patient Health Questionnaire-9 (J-PHQ-9) for depression in primary care. *Gen Hosp Psychiatry.* 2018;52:64-69.
86. Nakku JE, Rathod SD, Kizza D, et al. Validity and diagnostic accuracy of the Luganda version of the 9-item and 2-item patient health questionnaire for detecting major depressive disorder in rural Uganda. *GMH.* 2016;3.
87. Paika V, Andreoulakis E, Ntountoulaki E, et al. The Greek-Orthodox version of the Brief Religious Coping (B-RCOPE) instrument: psychometric properties in three samples and associations with mental disorders, suicidality, illness perceptions, and quality of life. *Ann Gen Psychiatry.* 2017;16:13.
88. Park H, Kim JH, Hahm BJ. The Distress Thermometer and the PHQ-2 for ultra-brief screening depression of cancer patients in Korea: P3-41. In: Abstracts of the IPOS 15th World Congress of Psycho-Oncology, 4-8 November 2013, Rotterdam, The Netherlands. *Psycho-Oncology.* 2013;22:303-304.
89. Persoons P, Luyckx K, Fischler B. Psychiatric diagnoses in gastroenterology: validation of a self-report instrument (PRIME-MD Patient Health Questionnaire), epidemiology and recognition. *Gastroenterology.* 2001;120:A114.
90. Rancans E, Trapencieris M, Ivanovs R, Vrublevska J. Validity of the PHQ-9 and PHQ-2 to screen for depression in nationwide primary care population in Latvia. *Ann Gen Psychiatry.* 2018;17:33.
91. Santos IS, Tavares BF, Munhoz TN, et al. Sensitivity and specificity of the Patient Health

Questionnaire-9 (PHQ-9) among adults from the general population. *Cad Saude Publica*. 2013;29:1533-1543.

92. Stafford L, Berk M, Jackson HJ. Validity of the Hospital Anxiety and Depression Scale and Patient Health Questionnaire-9 to screen for depression in patients with coronary artery disease. *Gen Hosp Psychiatry*. 2007;29:417-424.
93. Sung SC, Low CC, Fung DS, Chan YH. Screening for major and minor depression in a multiethnic sample of Asian primary care patients: a comparison of the nine-item Patient Health Questionnaire (PHQ-9) and the 16-item Quick Inventory of Depressive Symptomatology - Self-Report (QIDS-SR16). *Asia Pac Psychiatry*. 2013;5:249-258.
94. Suzuki K, Kumei S, Ohhira M, Nozu T, Okumura T. Screening for major depressive disorder with the Patient Health Questionnaire (PHQ-9 and PHQ-2) in an outpatient clinic staffed by primary care physicians in Japan: a case control study. *PLoS One*. 2015;10:e0119147.
95. van Heyningen T, Honikman S, Tomlinson M, Field S, Myer L. Comparison of mental health screening tools for detecting antenatal depression and anxiety disorders in South African women. *PLoS One*. 2018;13:e0193697.
96. Volker D, Zijlstra-Vlasveld MC, Brouwers EP, Homans WA, Emons WH, van der Feltz-Cornelis CM. Validation of the patient health questionnaire-9 for major depressive disorder in the occupational health setting. *J Occup Rehabil*. 2016;26:237-244.
97. Zhang Y, Ting R, Lam M, et al. Measuring depressive symptoms using the Patient Health Questionnaire-9 in Hong Kong Chinese subjects with type 2 diabetes. *J Affect Disord*. 2013;151:660-666.
98. Alamri SH, Bari AI, Ali AT. Depression and associated factors in hospitalized elderly: a

- cross-sectional study in a Saudi teaching hospital. *Ann Saudi Med.* 2017;37:122-129.
99. Bailer J, Kerstner T, Witthöft M, Diener C, Mier D, Rist F. Health anxiety and hypochondriasis in the light of DSM-5. *Anxiety Stress Copin.* 2016;29:219-239.
100. Becker S, Al Zaid K, Al Faris E. Screening for somatization and depression in Saudi Arabia: a validation study of the PHQ in primary care. *Int J Psychiatry Med.* 2002;32:271-283.
101. Brodey BB, Goodman SH, Baldasaro RE, et al. Development of the Perinatal Depression Inventory (PDI)-14 using item response theory: a comparison of the BDI-II, EPDS, PDI, and PHQ-9. *Arch Womens Ment Health.* 2016;19:307-316.
102. Chen S, Fang Y, Chiu H, Fan H, Jin T, Conwell Y. Validation of the nine-item Patient Health Questionnaire to screen for major depression in a Chinese primary care population. *Asia Pac Psychiatry.* 2013;5:61-68.
103. Chen S, Conwell Y, Vanorden K, et al. Prevalence and natural course of late-life depression in China primary care: a population based study from an urban community. *J Affect Disord.* 2012;141:86-93.
104. Fann JR, Bombardier CH, Dikmen S, et al. Validity of the Patient Health Questionnaire-9 in assessing depression following traumatic brain injury. *J Head Trauma Rehabil.* 2005;20:501-511.
105. Fisher L, Hessler DM, Polonsky WH, et al. Prevalence of depression in type 1 diabetes and the problem of over-diagnosis. *Diabet Med.* 2016;33:1590-1597.
106. Irmak C, Altıntaş M. The resilience, attachment, coping, and psychopathology of battered women: comparison of sheltered versus in-home women. *Anadolu Psikiyatr De.* 2017;18:561-570.

107. Lai BP, Tang AK, Lee DT, Yip AS, Chung TK. Detecting postnatal depression in Chinese men: a comparison of three instruments. *Psychiatry Res.* 2010;180:80-85.
108. Limon FJ. Screening Latino farmworkers for depression in primary care. *Dissertation Abstracts International: Section B: The Sciences and Engineering.* 2016.
109. Liu ZW, Yu Y, Hu M, Liu HM, Zhou L, Xiao SY. PHQ-9 and PHQ-2 for screening depression in Chinese rural elderly. *PLoS One.* 2016;11:e0151042.
110. Nacak Y, Morawa E, Tuffner D, Erim Y. Insecure attachment style and cumulative traumatic life events in patients with somatoform pain disorder: a cross-sectional study. *J Psychosom Res.* 2017;103:77-82.
111. Navines R, Castellvi P, Moreno-Espana J, et al. Depressive and anxiety disorders in chronic hepatitis C patients: reliability and validity of the Patient Health Questionnaire. *J Affect Disord.* 2012;138:343-351.
112. Phelan E, Williams B, Meeker K, et al. A study of the diagnostic accuracy of the PHQ-9 in primary care elderly. *BMC Fam Pract.* 2010;11:63.
113. Thompson AW, Liu H, Hays RD, et al. Diagnostic accuracy and agreement across three depression assessment measures for Parkinson's disease. *Parkinsonism Relat Disord.* 2011;17:40-45.
114. Vöhringer PA, Jimenez MI, Igor MA, et al. Detecting mood disorder in resource-limited primary care settings: comparison of a self-administered screening tool to general practitioner assessment. *J Med Screen.* 2013;20:118-124.
115. Watnick S, Wang PL, Demadura T, Ganzini L. Validation of 2 depression screening tools in dialysis patients. *Am J Kid Dis.* 2005;46:919-924.
116. Al-Ghafri G, Al-Sinawi H, Al-Muniri A, et al. Prevalence of depressive symptoms as

- elicited by Patient Health Questionnaire (PHQ-9) among medical trainees in Oman. *Asian J Psychiatr.* 2014;8:59-62.
117. Haddad M, Walters P, Phillips R, et al. Detecting depression in patients with coronary heart disease: a diagnostic evaluation of the PHQ-9 and HADS-D in primary care, findings from the UPBEAT-UK study. *PLoS One.* 2013;8:e78493.
118. Ikin JF, McKenzie DP, Gwini SM, et al. Major depression and depressive symptoms in Australian Gulf War veterans 20 years after the Gulf War. *J Affect Disord.* 2016;189:77-84.
119. Smith MV, Gotman N, Lin H, Yonkers KA. Do the PHQ-8 and the PHQ-2 accurately screen for depressive disorders in a sample of pregnant women? *Gen Hosp Psychiatry.* 2010;32:544-548.
120. Valencia-Garcia D, Bi X, Ayón C. Sensitivity and specificity in three measures of depression among Mexican American women. *J Immigr Minor Health.* 2017;19:562-571.
121. Wang L, Lu K, Li J, Sheng L, Ding R, Hu D. Value of patient health questionnaires (PHQ)-9 and PHQ-2 for screening depression disorders in cardiovascular outpatients. *Zhonghua Xin Xue Guan Bing Za Zhi.* 2015;43:428-431.
122. Choi SK, Boyle E, Burchell AN, et al. Validation of six short and ultra-short screening instruments for depression for people living with HIV in Ontario: results from the Ontario HIV treatment network cohort study. *PLoS One.* 2015;10:e0142706.
123. Du N, Yu K, Ye Y, Chen S. Validity study of Patient Health Questionnaire-9 items for Internet screening in depression among Chinese university students. *Asia Pac Psychiatry.* 2017;9:e12266.
124. Griffith SD, Thompson NR, Rathore JS, Jehi LE, Tesar GE, Katzan IL. Incorporating patient-reported outcome measures into the electronic health record for research: application



- using the Patient Health Questionnaire (PHQ-9). *Qual Life Res.* 2015;24:295-303.
125. Margrove K, Mensah S, Thapar A, Kerr M. Depression screening for patients with epilepsy in a primary care setting using the Patient Health Questionnaire-2 and the Neurological Disorders Depression Inventory for Epilepsy. *Epilepsy Behav.* 2011; 21:387-390.
126. Persoons P, Luyckx K, Desloovere C, Vandenberghe J, Fischler B. Anxiety and mood disorders in otorhinolaryngology outpatients presenting with dizziness: validation of the self-administered PRIME-MD Patient Health Questionnaire and epidemiology. *Gen Hosp Psychiatry.* 2003;25:316-323.
127. Rathore JS, Jehi LE, Fan Y, et al. Validation of the Patient Health Questionnaire-9 (PHQ-9) for depression screening in adults with epilepsy. *Epilepsy Behav.* 2014;37:215-220.
128. Scott JD, Wang CC, Coppel E, Lau A, Veitengruber J, Roy-Byrne P. Diagnosis of depression in former injection drug users with chronic hepatitis C. *J Clin Gastroenterol.* 2011;45:462-467.
129. Seo JG, Park SP. Validation of the Patient Health Questionnaire-9 (PHQ-9) and PHQ-2 in patients with migraine. *J Headache Pain.* 2015;16:65.
130. van Steenberg-Weijnenburg KM, de Vroege L, Ploeger RR, et al. Validation of the PHQ-9 as a screening instrument for depression in diabetes patients in specialized outpatient clinics. *BMC Health Serv Res.* 2010;10:235.
131. Wang W, Bian Q, Zhao Y, et al. Reliability and validity of the Chinese version of the Patient Health Questionnaire (PHQ-9) in the general population. *Gen Hosp Psychiatry.* 2014;36:539-544.
132. Woldetensay YK, Belachew T, Tesfaye M, et al. Validation of the Patient Health Questionnaire (PHQ-9) as a screening tool for depression in pregnant women: Afaan Oromo

version. *PLoS One*. 2018;13:e0191782.

133. Xiong N, Fritzsche K, Wei J, et al. Validation of patient health questionnaire (PHQ) for major depression in Chinese outpatients with multiple somatic symptoms: a multicenter cross-sectional study. *J Affect Disord*. 2015;174:636-643.
